# Supplementary material
Source: publisher figshare collection journal article supplement (https://acs.figshare.com/ndownloader/files/10275495)
Supplement: Supplementary file 1 [file 10275495]

## Sheet: Sheet1
Accession	Name	Peptides(95%)				%Cov(95)				117:116 (MI)					118:116(RG)								119:116(OP)								121:116(SM)
		sample1	sample2	sample3	Average	sample1	sample2	sample3	Average	sample1	sample2	sample3	Average	STDEV	sample1	sample2	sample3	Average	STDEV	RG/MI	P-value	Variability	sample1	sample2	sample3	Average	STDEV	OP/MI	P-value	Variability	sample1	sample2	sample3	Average	STDEV	P-value	SM/MI	Variability
IPI00188304.3	Glo1 Lactoylglutathione lyase	2	1	1	1.33333	10.33	5.435	5.435	7.06667	1.14815	1.36773	0.887156	1.13435	0.240584	0.981748	1.25892	1.11686	1.11918	0.138603	0.986629	0.465121	0.123844	1.1272	1.51356	1.13763	1.25946	0.220118	1.1103	0.271475	0.174771	1.04713	0.903649	1.00925	0.986677	0.0743563	0.200871	0.86982	0.0753603
IPI00188330.1	Ndufs8 Uncharacterized protein	6	4	4	4.66667	25	18.4	18.4	20.6	1.2942	0.316228	1.20226	0.937563	0.540051	0.60256	0.613762	1.01859	0.744971	0.237028	0.794583	0.307299	0.318171	0.855067	1.8197	1.27057	1.31511	0.483857	1.40269	0.209349	0.36792	1.05682	0.972747	2.24905	1.42621	0.713846	0.200799	1.52119	0.500521
IPI00188541.3	Itih4 inter-alpha-inhibitor H4 heavy chain	4	9	5	6	5.359	11.47	6.967	7.932	1.08643	1.20226	1.14815	1.14561	0.0579607	1.1272	1.02802	1.10662	1.08728	0.0523443	0.949079	0.133033	0.0481425	0.990832	1.07647	1.07647	1.04792	0.0494403	0.914724	0.0460884	0.0471794	1.00925	1.1272	1.09648	1.07764	0.0611868	0.117581	0.940668	0.0567783
IPI00188665.2	Rars Arginyl-tRNA synthetase, cytoplasmic	2	2	1	1.66667	3.485	3.485	1.515	2.82833	0.831764	0.765597	0.787046	0.794802	0.0337585	0.862979	0.772681	0.77983	0.805163	0.0501971	1.01304	0.391736	0.062344	0.855067	0.83946	0.801678	0.832068	0.0274511	1.04689	0.107486	0.0329914	0.972747	0.879022	0.903649	0.918473	0.048589	0.0135832	1.1556	0.0529019
IPI00188671.1	Galk1 Uncharacterized protein	1	1	1	1	2.296	2.296	2.296	2.296	0.772681	0.855067	0.83946	0.822402	0.0437617	0.613762	0.704693	0.787046	0.701834	0.0866773	0.853394	0.0609611	0.123501	0.0118032	0.011272	0.0114815	0.0115189	0.000267579	0.0140064	0.000484532	0.0232296	1	0.855067	0.912011	0.922359	0.0730187	0.0636079	1.12154	0.0791652
IPI00188819.1	Tmx2 Thioredoxin-related transmembrane protein 2	1	1	2	1.33333	3.39	3.39	8.475	5.085	0.895365	0.990832	1.10662	0.997607	0.105792	0.870964	1	1.49969	1.12355	0.332071	1.12624	0.292854	0.295555	0.903649	1	0.123595	0.675748	0.480599	0.677369	0.182937	0.711211	0.887156	0.758578	0.203236	0.616323	0.363475	0.102391	0.617802	0.589747
IPI00188909.3	Col1a1 Collagen alpha-1(I) chain	10	34	17	20.3333	9.566	29.32	14.52	17.802	0.870964	0.816582	0.104713	0.59742	0.427562	1.69044	1.05682	0.0390841	0.928781	0.833091	1.55465	0.291733	0.896972	0.92045	0.855067	0.387258	0.720925	0.290807	1.20673	0.351505	0.403381	0.744732	1.19124	0.10666	0.680878	0.545103	0.422729	1.1397	0.800589
IPI00188921.1	Col1a2 Collagen alpha-2(I) chain	6	21	12	13	7.799	18.51	12.03	12.7797	0.636796	1.1272	0.0465586	0.603517	0.541088	1.48594	1.23595	0.564937	1.09561	0.476268	1.81537	0.151752	0.434707	0.376704	0.870964	1.31826	0.855308	0.470972	1.41721	0.288317	0.550646	1.19124	1.41906	0.937562	1.18262	0.240863	0.0983521	1.95955	0.203669
IPI00188924.4	Uqcrc2 Cytochrome b-c1 complex subunit 2, mitochondrial	31	31	26	29.3333	51.77	49.12	42.04	47.6433	0.711214	0.334195	0.534564	0.526658	0.188634	0.118032	0.474242	0.648634	0.413636	0.270443	0.785399	0.294117	0.653819	0.544503	0.597035	0.685488	0.609009	0.0712513	1.15637	0.269129	0.116996	0.591562	0.334195	0.519996	0.481918	0.132842	0.377825	0.915049	0.275652
IPI00188989.1	Acsl1 Long-chain-fatty-acid--CoA ligase 1	25	22	26	24.3333	29.9	26.9	32.33	29.71	0.946237	0.47863	0.510505	0.645124	0.261258	0.109648	0.291072	0.549541	0.316753	0.221068	0.490996	0.0869123	0.697919	0.77983	0.981748	0.870964	0.877514	0.101118	1.36022	0.129959	0.115233	0.794328	0.263027	0.420727	0.492694	0.272864	0.261599	0.76372	0.553821
IPI00189176.6	Ndufa11 NADH dehydrogenase [ubiquinone] 1 alpha subcomplex subunit 11	1	1	3	1.66667	11.35	11.35	35.46	19.3867	1.25892	1.39316	0.862979	1.17169	0.275645	1.20226	1.38038	0.831764	1.13814	0.279875	0.971366	0.444779	0.245907	1.25892	1.38038	1.02802	1.22244	0.178995	1.04332	0.402194	0.146424	1.20226	1.02802	1.0666	1.09896	0.091521	0.34998	0.937929	0.0832798
IPI00189463.1	Psmd6 Uncharacterized protein	2	2	3	2.33333	6.17	6.17	7.455	6.59833	1.02802	0.887156	0.862979	0.92605	0.0891286	1.01859	0.954993	1.0666	1.01339	0.055983	1.09432	0.118339	0.0552431	1.01859	0.946237	0.981748	0.982192	0.036179	1.06063	0.197761	0.036835	0.946237	0.691831	0.737904	0.791991	0.135553	0.118088	0.855235	0.171155
IPI00189809.2	Myh6 myosin-6	432	310	325	355.667	68.33	68.18	67.51	68.0067	0.77983	0.134276	0.077983	0.330697	0.389978	0.591562	0.380189	0.824138	0.59863	0.222059	1.81021	0.18668	0.370945	0.787046	0.731139	0.666807	0.728331	0.0601687	2.20241	0.108654	0.0826117	0.0972747	0.251189	0.981748	0.443404	0.472529	0.383248	1.34082	1.06568
IPI00189811.1	Myh7 Myosin-7	354	249	259	287.333	61.76	61.24	59.38	60.7933	0.549541	0.291072	0.672977	0.50453	0.194891	1.01859	0.636796	0.636796	0.764061	0.22043	1.5144	0.101166	0.288498	0.37325	1.35519	0.346737	0.691725	0.574729	1.37103	0.318843	0.830863	0.0544503	0.903649	1.45881	0.805638	0.707293	0.271154	1.59681	0.87793
IPI00189813.1	Acta1 Actin, alpha skeletal muscle	86	77	65	76	67.37	67.37	62.86	65.8667	1.78649	0.233346	0.731139	0.916991	0.793075	2.99226	1.40605	1.11686	1.83839	1.00969	2.00481	0.142631	0.549225	0.401791	0.331131	0.92045	0.551124	0.321791	0.601013	0.259663	0.583881	0.157036	0.325087	1.11686	0.532996	0.512578	0.263082	0.581244	0.961693
IPI00189981.1	F2 Prothrombin (Fragment)	1	1	1	1	2.269	2.269	2.269	2.269	1.33045	1.70608	1.24738	1.42797	0.244405	1.20226	1.61436	1.51356	1.44339	0.214821	1.0108	0.469291	0.14883	1.30617	1.52757	1.36773	1.40049	0.114275	0.980753	0.435896	0.0815967	0.809096	0.672977	0.870964	0.784345	0.101287	0.0153487	0.549272	0.129136
IPI00190161.1	Ndufc2 NADH dehydrogenase [ubiquinone] 1 subunit C2	5	3	3	3.66667	25	19.17	20	21.39	0.963829	0.554626	0.946237	0.821564	0.231343	0.642688	0.549541	0.981748	0.724659	0.227465	0.882048	0.316109	0.313892	0.895365	0.83946	1.02802	0.920947	0.0968461	1.12097	0.273559	0.105159	0.855067	0.42462	0.92045	0.733379	0.269384	0.344863	0.892662	0.367319
IPI00190287.1	Prelp Prolargin	2	3	2	2.33333	5.836	9.019	5.57	6.80833	0.862979	0.83946	10	3.90081	5.28206	0.801678	0.895365	8.95365	3.55023	4.67973	0.910126	0.467811	1.31815	0.83946	0.895365	9.28966	3.67483	4.86267	0.942068	0.479577	1.32324	0.879022	0.937562	0.990832	0.935805	0.0559254	0.216739	0.2399	0.0597618
IPI00190417.1	Kbtbd10 Kelch repeat and BTB domain-containing protein 10	2	2	2	2	3.135	3.135	3.135	3.135	1.04713	1.85353	0.737904	1.21286	0.575982	0.895365	1.05682	0.570164	0.840782	0.247876	0.693226	0.193376	0.294816	1.04713	0.0772681	0.322107	0.482168	0.504353	0.397548	0.0874485	1.04601	0.704693	0.0613762	0.366438	0.377502	0.321801	0.0559976	0.311251	0.852448
IPI00190557.2	Phb2 Prohibitin-2	11	11	12	11.3333	35.12	39.13	48.83	41.0267	0.816582	0.239883	0.483059	0.513175	0.289527	0.267917	0.630957	0.591562	0.496812	0.199205	0.968114	0.470033	0.400967	0.737904	0.870964	0.724436	0.777768	0.0809902	1.5156	0.125216	0.104132	1.07647	0.831764	0.474242	0.794157	0.302868	0.155066	1.54754	0.38137
IPI00190701.5	Apoe Apolipoprotein E	6	12	11	9.66667	24.68	41.67	37.5	34.6167	1	2.58226	1.90546	1.82924	0.793879	0.92045	0.539511	0.613762	0.691241	0.201943	0.377884	0.0617394	0.292145	0.972747	1.67494	0.937562	1.19508	0.415942	0.653323	0.153628	0.348044	1.21339	1.87068	1.83654	1.6402	0.370026	0.367386	0.896658	0.225598
IPI00190886.3	Coq5 2-methoxy-6-polyprenyl-1,4-benzoquinol methylase, mitochondrial	3	2	1	2	12.84	9.786	6.728	9.78467	0.946237	0.92045	1.05682	0.974502	0.0724448	0.92045	1.02802	1.34276	1.09708	0.219464	1.12578	0.22005	0.200045	0.887156	0.937562	0.946237	0.923652	0.0319024	0.94782	0.176825	0.0345395	0.92045	0.83946	0.809096	0.856335	0.0575629	0.047441	0.878742	0.0672201
IPI00191090.1	Bgn Biglycan	7	6	8	7	20.87	19.78	23.58	21.41	2.12814	1.92309	1.24738	1.7662	0.460861	8.47227	2.24905	1.10662	3.94265	3.96414	2.23227	0.221158	1.00545	2.42103	1.33045	0.954993	1.56883	0.761532	0.888247	0.362205	0.485416	2.51189	1.90546	0.928966	1.7821	0.798637	0.48897	1.009	0.448143
IPI00191103.2	Ndufa2 NADH dehydrogenase [ubiquinone] 1 alpha subcomplex subunit 2	3	3	3	3	18.56	18.56	31.96	23.0267	0.887156	0.972747	0.946237	0.93538	0.0438163	0.165959	0.744732	0.92045	0.61038	0.394781	0.652548	0.144678	0.646779	0.346737	0.946237	0.903649	0.732208	0.334506	0.782792	0.201649	0.456846	0.420727	0.178649	0.92045	0.506608	0.378284	0.0935594	0.541607	0.746699
IPI00191112.1	Ndufab1 Acyl carrier protein	4	4	4	4	20.51	20.51	20.51	20.51	1.10662	1.27057	1.25892	1.21204	0.0914794	0.801678	0.895365	1	0.899014	0.0992113	0.741736	0.00805128	0.110356	1.00925	1.14815	1.20226	1.11989	0.0995612	0.923971	0.151821	0.0889026	1.0666	0.912011	0.981748	0.986785	0.0774156	0.0162297	0.814151	0.0784524
IPI00191312.1	Ndufa7 Uncharacterized protein	4	6	6	5.33333	34.82	51.79	48.21	44.94	0.672977	0.597035	0.816582	0.695531	0.111498	0.192309	0.580764	0.816582	0.529885	0.315231	0.761842	0.232701	0.594905	0.704693	0.758578	0.887156	0.783476	0.0937449	1.12644	0.178175	0.119653	0.809096	0.660694	0.937562	0.80245	0.138554	0.179513	1.15372	0.172663
IPI00191501.1	Psma6 Proteasome subunit alpha type-6	2	3	3	2.66667	7.317	12.6	12.6	10.839	0.895365	0.608135	0.981748	0.828416	0.195597	1.2942	1.47231	1.2942	1.35357	0.102835	1.63392	0.0127665	0.0759735	0.737904	0.698232	0.648634	0.694924	0.0447268	0.838858	0.179302	0.0643622	1.39316	1.10662	1.14815	1.21598	0.15484	0.0288377	1.46784	0.127338
IPI00191681.1	Itgb1 Integrin beta-1	2	3	1	2	2.879	5.006	1.502	3.129	1.03753	1.11686	0.990832	1.04841	0.063716	1.20226	1.14815	0.912011	1.08748	0.154347	1.03726	0.357812	0.141932	1.09648	0.937562	0.83946	0.957833	0.129703	0.913608	0.179624	0.135412	0.92045	1	0.912011	0.944153	0.0485482	0.0459745	0.900559	0.0514198
IPI00191728.1	Calr Calreticulin	13	10	9	10.6667	23.8	20.19	17.55	20.5133	0.903649	3.40408	1.5417	1.94981	1.29921	1.20226	3.56451	0.744732	1.83717	1.51331	0.94223	0.463442	0.82372	0.724436	0.92045	0.519996	0.721627	0.200242	0.370101	0.120713	0.277486	1.01859	2.31206	1.99526	1.77531	0.674206	0.424804	0.910502	0.379769
IPI00191737.6	Alb Serum albumin	134	114	99	115.667	74.67	74.34	75.49	74.8333	1.18032	2.67917	1.03753	1.63234	0.909388	2.75423	2.51189	0.654636	1.97358	1.14865	1.20905	0.354146	0.582013	1.55597	0.92045	0.280543	0.918986	0.637713	0.562987	0.167478	0.69393	0.981748	1.23595	0.824138	1.01394	0.207784	0.180004	0.62116	0.204926
IPI00191749.5	Psmb1 Proteasome subunit beta type-1	1	1	1	1	5.833	5.833	5.833	5.833	0.794328	0.879022	0.855067	0.842806	0.0436581	0.608135	0.698232	1.02802	0.778128	0.221049	0.923259	0.332585	0.284077	0.654636	0.717794	0.679204	0.683878	0.0318375	0.81143	0.00443615	0.0465544	0.608135	0.519996	0.0111686	0.379767	0.322243	0.0640446	0.450598	0.848529
IPI00191913.1	Ndufv1 Uncharacterized protein	23	16	19	19.3333	46.34	39.01	46.12	43.8233	0.625173	0.172187	0.205116	0.334159	0.252563	0.214783	0.586138	0.564937	0.455286	0.208551	1.36248	0.278926	0.458067	0.77983	0.946237	0.685488	0.803852	0.132024	2.4056	0.0322146	0.164239	0.619441	0.316228	0.672977	0.536215	0.192386	0.168108	1.60467	0.358785
IPI00192043.3	Mccc2 Methylcrotonoyl-CoA carboxylase beta chain, mitochondrial	4	4	4	4	10.66	10.3	11.72	10.8933	0.963829	0.586138	0.912011	0.820659	0.204747	0.928966	0.597035	1.00925	0.845085	0.218536	1.02976	0.447255	0.258596	1	1.00925	1	1.00308	0.00534224	1.22229	0.13135	0.00532581	1	0.831764	0.831764	0.887842	0.0971313	0.322336	1.08186	0.109401
IPI00192246.1	Cox5a Cytochrome c oxidase subunit 5A, mitochondrial	16	14	15	15	58.9	66.44	67.12	64.1533	0.92045	0.405508	0.267917	0.531292	0.343971	0.816582	0.60256	0.394457	0.604533	0.211069	1.13786	0.386	0.349145	0.847227	0.711214	0.436516	0.664986	0.209222	1.25164	0.301028	0.314626	0.912011	0.57544	0.597035	0.694829	0.188395	0.260395	1.30781	0.271139
IPI00192301.2	Gpx1 Glutathione peroxidase 1	5	6	6	5.66667	28.86	39.8	35.82	34.8267	1.09648	0.912011	0.737904	0.915464	0.179312	0.83946	0.903649	0.625173	0.789427	0.145824	0.862325	0.200222	0.184722	1.57036	0.981748	0.887156	1.14642	0.370177	1.25229	0.20249	0.322898	1.31826	1.02802	1.05682	1.13436	0.159906	0.0953006	1.23911	0.140965
IPI00192504.2	Mrc2 C-type mannose receptor 2	1	1	1	1	0.8784	0.8784	0.8784	0.8784	0.636796	0.704693	0.691831	0.677773	0.0360657	0.011272	0.0119124	0.0115878	0.0115907	0.000320231	0.0171012	0.000487376	0.0276282	0.937562	1.02802	1.07647	1.01401	0.0705021	1.4961	0.00265875	0.0695277	0.928966	0.794328	0.847227	0.856841	0.0678319	0.0132731	1.2642	0.0791652
IPI00192736.1	Drg1 Uncharacterized protein	2	1	1	1.33333	7.084	2.725	2.725	4.178	0.0691831	0.809096	0.801678	0.559986	0.425064	0.731139	0.816582	0.912011	0.819911	0.0904818	1.46416	0.20063	0.110356	0.642688	0.751623	0.794328	0.729546	0.0781936	1.30279	0.2815	0.107181	1.22462	0.990832	1.05682	1.09076	0.12053	0.0775549	1.94783	0.110502
IPI00192903.3	Afg3l2 Uncharacterized protein	2	2	4	2.66667	2.618	2.618	4.364	3.2	1.18032	0.855067	0.83946	0.958283	0.192449	1.02802	0.794328	0.928966	0.917104	0.117295	0.957028	0.385298	0.127897	1.35519	0.954993	0.895365	1.06852	0.25005	1.11503	0.289888	0.234017	1.11686	0.831764	0.954993	0.967873	0.142985	0.474175	1.01001	0.147732
IPI00192912.1	Rcn1 Uncharacterized protein	1	1	1	1	4.923	4.923	4.615	4.82033	0.895365	1	1.21339	1.03625	0.162082	0.0177011	0.0131826	0.625173	0.218685	0.352036	0.211035	0.0197022	1.60978	0.77983	0.862979	0.642688	0.761832	0.111243	0.735181	0.0406079	0.14602	1.55597	1.33045	1.03753	1.30798	0.259948	0.106313	1.26223	0.19874
IPI00193233.1	Cyb5b Cytochrome b5 type B	1	1	1	1	8.904	8.904	8.904	8.904	0.824138	0.912011	0.903649	0.879933	0.0485001	0.847227	0.972747	1.09648	0.972151	0.124626	1.1048	0.165052	0.128197	0.981748	1.07647	1.1272	1.0618	0.0738251	1.20669	0.0149541	0.069528	0.824138	0.704693	0.751623	0.760151	0.0601775	0.0288069	0.863874	0.0791651
IPI00193243.1	Apobec2 Uncharacterized protein	2	1	2	1.66667	9.821	6.696	9.821	8.77933	1.0666	0.847227	0.751623	0.888482	0.161488	1.10662	1.1695	1.78649	1.3542	0.375687	1.52418	0.0763251	0.277423	1.1695	1.18032	1.70608	1.35197	0.30672	1.52166	0.0513046	0.226869	1.08643	0.981748	1.51356	1.19391	0.281729	0.0982314	1.34377	0.235971
IPI00193247.1	Cse1l Uncharacterized protein	2	2	1	1.66667	2.472	2.472	0.8239	1.92263	0.801678	1.40605	1.44544	1.21772	0.360843	17.5388	1.07647	1.01859	6.54462	9.52129	5.37448	0.21739	1.45483	7.58578	1.72187	1.33045	3.54603	3.50399	2.91202	0.18435	0.988144	2.208	1.92309	1.5417	1.89093	0.334315	0.0385806	1.55284	0.176799
IPI00193349.1	Cops4 COP9 signalosome complex subunit 4	1	1	1	1	2.956	2.956	2.956	2.956	1.28233	1.41906	1.40605	1.36915	0.0754643	1.57036	1.80302	2.03236	1.80191	0.230999	1.31609	0.0356821	0.128197	1.22462	1.34276	1.41906	1.32881	0.0979685	0.970542	0.302082	0.0737263	1.23595	1.05682	1.13763	1.14346	0.089707	0.0151383	0.835166	0.078452
IPI00193485.2	Idh2 Isocitrate dehydrogenase [NADP], mitochondrial	53	49	53	51.6667	61.95	61.73	62.83	62.17	0.660694	0.158489	0.134276	0.31782	0.297184	0.0544503	0.272898	0.30479	0.210713	0.136263	0.662994	0.306314	0.646679	0.544503	0.619441	0.505825	0.556589	0.0577645	1.75127	0.148601	0.103783	0.474242	0.263027	0.331131	0.356133	0.107804	0.424771	1.12055	0.302708
IPI00193500.2	H2afy Histone H2A	2	2	2	2	6.452	6.452	6.452	6.452	1.02802	1.13763	1.1272	1.09761	0.0604985	1.40605	1.61436	1.8197	1.61337	0.206828	1.46989	0.0203191	0.128196	1.04713	1.15878	1.21339	1.13977	0.0847448	1.0384	0.262826	0.0743529	1.24738	1.0666	1.14815	1.15404	0.0905373	0.213499	1.05141	0.0784522
IPI00193522.3	Sec22b Vesicle-trafficking protein SEC22b	1	2	2	1.66667	5.581	9.302	9.302	8.06167	3.87258	1.61436	1.31826	2.2684	1.39713	4.09261	1.24738	1.05682	2.13227	1.70037	0.939989	0.460011	0.797448	3.04789	0.92045	0.981748	1.65003	1.21097	0.727399	0.297022	0.73391	1.23595	1.04713	1.1695	1.15086	0.0957792	0.149985	0.507344	0.0832242
IPI00193716.1	Ivd Isovaleryl-CoA dehydrogenase, mitochondrial	8	7	7	7.33333	23.11	19.81	19.34	20.7533	0.862979	0.862979	1.01859	0.914849	0.0898429	0.636796	0.912011	1.01859	0.855799	0.197007	0.935454	0.335528	0.230202	0.801678	0.954993	0.981748	0.912806	0.0971651	0.997767	0.489977	0.106447	0.946237	0.972747	1.10662	1.00854	0.0859746	0.131025	1.10241	0.0852469
IPI00193828.1	Fxyd1 Phospholemman	1	1	1	1	13.04	13.04	13.04	13.04	1.15878	0.420727	0.751623	0.777042	0.369681	0.731139	0.711214	0.772681	0.738344	0.0313606	0.950199	0.436537	0.0424742	0.794328	0.794328	1.39316	0.993938	0.345734	1.27913	0.249676	0.347843	0.831764	1.02802	1.23595	1.03191	0.20212	0.184765	1.328	0.19587
IPI00193918.1	Cox5b Cytochrome c oxidase subunit 5B, mitochondrial	16	9	13	12.6667	49.61	42.64	57.36	49.87	0.654636	0.299226	0.275423	0.409762	0.212401	0.125893	0.501187	0.534564	0.387215	0.226926	0.944975	0.45305	0.586047	0.619441	0.704693	1.19124	0.838459	0.308479	2.04621	0.0637047	0.367911	0.758578	0.505825	0.751623	0.672008	0.143961	0.0805793	1.64	0.214225
IPI00194045.1	Idh1 Isocitrate dehydrogenase [NADP] cytoplasmic	5	6	5	5.33333	11.59	13.04	11.59	12.0733	0.794328	0.83946	0.895365	0.843051	0.0506139	0.787046	0.855067	0.744732	0.795615	0.0556642	0.943733	0.168339	0.0699638	0.691831	0.724436	0.772681	0.729649	0.0406761	0.865486	0.0206632	0.0557475	1.35519	1.08643	1.03753	1.15971	0.171042	0.0373766	1.37562	0.147487
IPI00194087.3	Actc1 Actin, alpha cardiac muscle 1	100	89	77	88.6667	67.64	67.64	62.86	66.0467	0.963829	0.895365	0.642688	0.83396	0.169147	0.474242	0.758578	0.717794	0.650205	0.153746	0.779659	0.118411	0.236458	0.731139	0.870964	0.608135	0.736746	0.131504	0.88343	0.239181	0.178493	0.586138	0.666807	0.580764	0.611236	0.0482003	0.0708299	0.732932	0.078857
IPI00194097.5	Gc Vitamin D-binding protein	2	3	1	2	6.513	8.193	1.891	5.53233	0.855067	0.963829	0.887156	0.902017	0.0558834	0.824138	0.887156	0.92045	0.877248	0.0489143	0.97254	0.297479	0.0557588	0.92045	0.92045	0.972747	0.937882	0.030194	1.03976	0.199296	0.0321938	1.34276	1.09648	1.13763	1.19229	0.131929	0.0231865	1.3218	0.110652
IPI00194222.1	Cox4i1 Cytochrome c oxidase subunit 4 isoform 1, mitochondrial	21	15	18	18	49.7	49.11	55.62	51.4767	1.02802	0.444631	0.625173	0.699273	0.298668	0.151356	0.49204	0.625173	0.422856	0.244367	0.604708	0.142491	0.577897	0.737904	0.549541	0.758578	0.682008	0.115184	0.975309	0.466167	0.16889	0.549541	0.190546	0.717794	0.48596	0.269313	0.205373	0.694951	0.554187
IPI00194312.3	Ola1 Obg-like ATPase 1	2	2	2	2	7.828	5.556	5.556	6.31333	0.954993	0.564937	0.666807	0.728912	0.202308	1.05682	0.114815	0.376704	0.516112	0.486229	0.708058	0.27	0.942098	1	0.83946	0.963829	0.93443	0.0842111	1.28195	0.106842	0.0901203	1.01859	0.21677	0.685488	0.640283	0.402817	0.378128	0.878409	0.629123
IPI00194324.2	Pdhb Pyruvate dehydrogenase E1 component subunit beta, mitochondrial	25	18	20	21	42.9	40.11	43.45	42.1533	0.831764	0.218776	0.380189	0.47691	0.317733	0.0751623	0.619441	0.636796	0.4438	0.319367	0.930574	0.452423	0.71962	0.580764	0.636796	0.954993	0.724184	0.20184	1.51849	0.164608	0.278713	1.03753	0.519996	0.554626	0.70405	0.289319	0.20607	1.47627	0.410936
IPI00194471.1	Psmd5 Proteasome (Prosome, macropain) 26S subunit, non-ATPase, 5 (Predicted), isoform CRA_b	2	2	1	1.66667	5.556	5.556	1.786	4.29933	15.5597	9.37562	1.59956	8.84495	6.99516	12.1339	6.85488	1.49969	6.82949	5.31715	0.772134	0.356405	0.778558	12.5892	7.87046	1.38038	7.28003	5.62771	0.823072	0.389211	0.773034	21.0863	9.12011	1.92309	10.7098	9.68	0.400718	1.21084	0.903843
IPI00195123.1	Atp5o ATP synthase subunit O, mitochondrial	19	19	20	19.3333	61.97	67.61	64.32	64.6333	0.432514	0.148594	0.246604	0.275904	0.14421	0.138038	0.554626	0.809096	0.500587	0.338777	1.81435	0.18788	0.67676	0.831764	0.666807	1	0.832857	0.166599	3.01865	0.00622084	0.200034	0.879022	0.515229	0.580764	0.658339	0.193907	0.0282935	2.38612	0.294539
IPI00195173.1	Cd59 CD59 glycoprotein	1	1	1	1	7.143	7.143	7.143	7.143	1.0666	1.05682	1.04713	1.05685	0.00973353	1.02802	1.05682	1.18032	1.08838	0.0809108	1.02984	0.285004	0.0743402	0.946237	0.946237	1	0.964158	0.03104	0.912296	0.0133394	0.0321939	0.928966	0.666807	0.711214	0.768996	0.140307	0.0350976	0.727631	0.182455
IPI00195376.1	Pln Cardiac phospholamban	2	3	2	2.33333	32.69	32.69	32.69	32.69	0.990832	0.524808	0.912011	0.809217	0.249439	0.954993	0.963829	0.954993	0.957938	0.00510169	1.18378	0.205137	0.0053257	1.00925	1.14815	1.0666	1.07467	0.0698014	1.32803	0.100314	0.0649516	0.990832	0.879022	0.972747	0.947534	0.0600177	0.220048	1.17093	0.063341
IPI00195516.6	Hpx Hemopexin	11	14	13	12.6667	26.52	31.3	26.74	28.1867	2.39883	2.33346	2.58226	2.43818	0.128984	2.58226	2.91072	0.862979	2.11865	1.09978	0.868947	0.332804	0.519092	1.69044	2.88403	1.51356	2.02934	0.745446	0.832318	0.221621	0.367333	2.07014	1.47231	1.49969	1.68071	0.337532	0.0230956	0.68933	0.200827
IPI00195593.1	Cpt2 Carnitine O-palmitoyltransferase 2, mitochondrial	12	12	12	12	17.63	17.93	18.69	18.0833	1.03753	0.534564	0.510505	0.694199	0.297575	0.474242	0.619441	0.544503	0.546062	0.0726121	0.786607	0.241087	0.132974	0.879022	0.879022	0.510505	0.756183	0.212764	1.08929	0.392596	0.281365	0.903649	0.625173	0.277971	0.602264	0.313467	0.365641	0.867567	0.520481
IPI00195860.1	Cox7a2l2;Cox7a2 Cytochrome c oxidase subunit 7A2, mitochondrial	7	7	7	7	37.35	37.35	37.35	37.35	0.912011	0.809096	0.887156	0.869421	0.0537007	0.758578	0.855067	0.619441	0.744362	0.118454	0.856158	0.100623	0.159135	0.642688	0.83946	0.737904	0.740017	0.0984032	0.851161	0.0683099	0.132974	0.92045	0.981748	0.963829	0.955342	0.0315181	0.0452699	1.09883	0.0329914
IPI00196107.1	Atp5f1 ATP synthase subunit b, mitochondrial	14	15	15	14.6667	42.58	42.58	42.58	42.58	0.954993	0.49204	0.654636	0.700556	0.234868	0.30761	0.47863	0.57544	0.453893	0.135618	0.647904	0.103815	0.298788	0.711214	0.724436	0.855067	0.763572	0.079512	1.08995	0.347819	0.104132	0.887156	0.608135	0.586138	0.69381	0.167804	0.484921	0.99037	0.241858
IPI00196202.1	Nedd8 NEDD8	1	1	2	1.33333	13.58	11.11	24.69	16.46	0.772681	1.0666	0.0801678	0.639815	0.506458	1.03753	1.0666	0.0337287	0.712618	0.588115	1.11379	0.439489	0.825288	0.903649	0.937562	0.0111686	0.61746	0.525337	0.965061	0.480115	0.850804	0.731139	11.0662	0.630957	4.14278	5.9961	0.209098	6.47497	1.44736
IPI00196283.1	Hhatl Uncharacterized protein	4	2	2	2.66667	10.54	6.163	6.163	7.622	0.981748	0.128233	0.928966	0.679649	0.478269	1.0666	0.809096	0.862979	0.91289	0.135812	1.34318	0.245706	0.148772	1.11686	1.03753	0.990832	1.04841	0.063716	1.54257	0.156394	0.0607741	0.92045	0.291072	1.05682	0.756113	0.408469	0.421877	1.11251	0.540222
IPI00196647.4	Cpt1b Carnitine O-palmitoyltransferase 1, muscle isoform	12	12	17	13.6667	13.34	14.64	19.43	15.8033	1.08643	0.847227	1.1272	1.02028	0.151251	0.57544	0.642688	1.00925	0.74246	0.233483	0.7277	0.0852883	0.314472	0.895365	0.92045	1.09648	0.970764	0.109591	0.951465	0.336057	0.112892	0.963829	0.654636	1.00925	0.875906	0.192967	0.184234	0.858493	0.220305
IPI00196750.1	Ssbp1 Single-stranded DNA-binding protein, mitochondrial	2	3	3	2.66667	11.92	21.85	21.85	18.54	0.912011	0.981748	0.879022	0.92426	0.0524468	0.855067	0.809096	0.787046	0.817069	0.0347044	0.884025	0.0249982	0.0424742	0.946237	1.01859	1.11686	1.02723	0.0856404	1.11141	0.0825109	0.0833702	0.809096	0.879022	0.903649	0.863923	0.049052	0.109792	0.934718	0.0567782
IPI00196751.2	Hspa1b;Hspa1a Heat shock 70 kDa protein 1A/1B	11	9	11	10.3333	18.25	13.1	17.16	16.17	2.10863	1.10662	0.824138	1.34646	0.674997	3.87258	0.794328	1.11686	1.92792	1.69182	1.43184	0.31197	0.877537	3.76704	0.717794	0.981748	1.82219	1.68945	1.35332	0.342704	0.927151	3.46737	0.758578	1.04713	1.75769	1.48764	0.347171	1.30541	0.846358
IPI00196994.1	Arhgdia Rho GDP-dissociation inhibitor 1	5	6	2	4.33333	24.51	32.35	12.75	23.2033	0.990832	1.01859	0.990832	1.00008	0.0160267	1.03753	0.954993	0.816582	0.936368	0.111644	0.936288	0.213753	0.119231	0.963829	0.946237	0.870964	0.92701	0.0493281	0.926931	0.0565074	0.053212	1.01859	1.07647	0.879022	0.99136	0.101499	0.447995	0.991275	0.102384
IPI00197081.1	Mrps14 Uncharacterized protein	1	1	1	1	11.72	11.72	11.72	11.72	0.787046	0.870964	0.855067	0.837692	0.0445753	0.0110662	0.011695	0.0144544	0.0124052	0.00180228	0.0148088	0.000477432	0.145284	0.737904	0.809096	0.855067	0.800689	0.0590319	0.955827	0.219267	0.0737264	1.24738	1.0666	1.13763	1.15054	0.0910821	0.00694698	1.37346	0.079165
IPI00197150.1	Smtn Uncharacterized protein	1	1	2	1.33333	3.604	3.604	9.234	5.48067	0.972747	1.07647	0.912011	0.987074	0.083158	0.744732	0.855067	0.263027	0.620942	0.314835	0.629073	0.0875411	0.507027	1.07647	1.19124	1.40605	1.22459	0.167302	1.24062	0.0585295	0.13662	0.772681	0.660694	0.394457	0.609277	0.194283	0.0305861	0.617256	0.318875
IPI00197369.1	Ptges2 Uncharacterized protein	1	1	2	1.33333	3.646	3.646	7.031	4.77433	1	1	0.963829	0.987943	0.0208833	0.895365	0.946237	0.990832	0.944145	0.047768	0.955667	0.124943	0.0505939	1.02802	1.0666	1	1.03154	0.0334374	1.04413	0.0707759	0.0324151	1.05682	0.903649	0.928966	0.963145	0.0821052	0.328698	0.974899	0.085247
IPI00197555.6	Suclg1 Succinyl-CoA ligase [GDP-forming] subunit alpha, mitochondrial	10	8	9	9	30.64	28.61	30.06	29.77	0.83946	0.444631	0.405508	0.5632	0.240047	0.564937	0.765597	0.787046	0.70586	0.122513	1.2533	0.213666	0.173566	0.648634	0.654636	0.672977	0.658749	0.0126816	1.16965	0.280973	0.0192511	0.554626	0.141906	0.401791	0.366107	0.208661	0.172328	0.650049	0.569945
IPI00197579.2	Tubb5 Isoform 1 of Tubulin beta-5 chain	20	21	13	18	32.21	30.18	27.48	29.9567	1	11.3763	1.09648	4.49092	5.96309	1.65959	14.9969	2.12814	6.26153	7.56864	1.39426	0.383512	1.20875	1.22462	10.5682	1.41906	4.40395	5.33926	0.980635	0.492949	1.21238	0.895365	8.79023	0.816582	3.50072	4.58101	0.415736	0.779512	1.30859
IPI00197696.2	Mdh2 Malate dehydrogenase, mitochondrial	40	49	43	44	64.5	72.49	71.01	69.3333	0.642688	0.210863	0.283139	0.378897	0.23129	0.0879023	0.337287	0.363078	0.262756	0.151976	0.693477	0.256731	0.578391	0.580764	0.895365	0.831764	0.769298	0.166343	2.03036	0.0415477	0.216227	0.816582	0.432514	0.586138	0.611745	0.19331	0.126991	1.61454	0.315999
IPI00197703.2	Apoa1 Apolipoprotein A-I	4	6	6	5.33333	13.51	21.24	24.71	19.82	0.887156	0.954993	0.954993	0.93238	0.0391655	1.04713	0.903649	0.981748	0.977509	0.0718337	1.0484	0.203979	0.0734865	1	0.928966	0.870964	0.93331	0.0646278	1.001	0.492114	0.0692458	1.80302	1.09648	1.14815	1.34922	0.393852	0.103618	1.44707	0.291912
IPI00197711.1	Ldha L-lactate dehydrogenase A chain	24	26	21	23.6667	57.83	58.73	46.99	54.5167	1	0.291072	0.394457	0.561843	0.38296	0.794328	0.758578	0.440555	0.664487	0.194753	1.18269	0.353543	0.293088	1.65959	0.83946	0.554626	1.01789	0.573684	1.8117	0.162301	0.5636	1.15878	0.218776	0.42462	0.600724	0.494126	0.459854	1.0692	0.82255
IPI00197770.1	Aldh2 Aldehyde dehydrogenase, mitochondrial	19	15	13	15.6667	34.1	32.95	26.2	31.0833	0.49204	0.42462	0.409261	0.441973	0.0440335	0.255859	0.625173	0.698232	0.526421	0.237145	1.19107	0.301194	0.450484	0.440555	0.691831	0.496592	0.542993	0.131908	1.22856	0.157632	0.242927	0.501187	0.698232	0.461318	0.553579	0.12685	0.131763	1.25252	0.229145
IPI00197888.2	Tpm1 Isoform 1 of Tropomyosin alpha-1 chain	78	60	65	67.6667	71.13	72.54	73.94	72.5367	0.928966	0.291072	0.0751623	0.431733	0.443942	0.20893	0.461318	0.390841	0.353696	0.13023	0.819246	0.397033	0.368196	0.704693	0.510505	0.30761	0.507603	0.198558	1.17573	0.402934	0.391167	0.654636	0.691831	1.1272	0.824555	0.262755	0.136242	1.90987	0.318663
IPI00197986.2	Ndufv3;Ndufv3-ps1 NADH dehydrogenase [ubiquinone] flavoprotein 3, mitochondrial isoform 1	4	2	3	3	11.35	4.803	6.769	7.64067	1.1272	0.103753	0.283139	0.504697	0.546512	1.10662	3.98107	0.47863	1.85544	1.86744	3.67635	0.168352	1.00646	1.21339	6.98232	1.92309	3.37294	3.1459	6.68309	0.126539	0.932689	0.963829	0.413047	0.831764	0.736213	0.287554	0.280999	1.45872	0.390585
IPI00198039.1	Ethe1 Uncharacterized protein	1	1	1	1	5.512	5.512	5.512	5.512	0.928966	1.02802	1.01859	0.991858	0.054669	1.38038	1.58489	1.78649	1.58392	0.203054	1.59692	0.0150145	0.128197	0.972747	1.0666	1.11686	1.05207	0.073148	1.06071	0.160938	0.0695277	1.00925	0.862979	0.92045	0.930894	0.0736944	0.159452	0.938535	0.0791652
IPI00198327.2	Vdac2 Voltage-dependent anion-selective channel protein 2	9	10	12	10.3333	23.05	23.05	30.17	25.4233	1.13763	0.946237	0.879022	0.987629	0.134179	0.77983	0.698232	0.92045	0.799504	0.112407	0.809519	0.0691768	0.140596	1.07647	1.08643	0.92045	1.02778	0.0930844	1.04065	0.34733	0.0905684	0.954993	0.496592	0.724436	0.72534	0.229201	0.089616	0.734426	0.315992
IPI00198467.1	Hadhb Trifunctional enzyme subunit beta, mitochondrial	21	20	21	20.6667	43.58	41.68	40.84	42.0333	0.928966	0.487529	0.57544	0.663978	0.233658	0.175388	0.685488	0.737904	0.532927	0.310745	0.802627	0.296472	0.583091	0.77983	0.816582	0.758578	0.784997	0.0293455	1.18226	0.232426	0.037383	0.731139	0.440555	0.711214	0.627636	0.162323	0.41849	0.945266	0.258626
IPI00198497.1	Csrp3 Cysteine and glycine-rich protein 3	10	6	5	7	42.27	32.99	24.23	33.1633	1.02802	0.586138	0.862979	0.825711	0.223284	1.36773	0.990832	1.01859	1.12572	0.210047	1.36333	0.0827883	0.18659	1.15878	0.862979	1	1.00725	0.148033	1.21986	0.157328	0.146967	0.57544	0.711214	1	0.762218	0.216827	0.370842	0.923105	0.284468
IPI00198620.1	Atp5d ATP synthase subunit delta, mitochondrial	13	10	9	10.6667	58.33	41.07	41.07	46.8233	0.772681	0.0903649	0.0679204	0.310322	0.400572	0.277971	0.554626	0.483059	0.438552	0.143597	1.41322	0.322135	0.327434	0.698232	0.660694	0.515229	0.624718	0.0966606	2.01313	0.152741	0.154727	0.847227	1.30617	0.654636	0.936011	0.334718	0.0543466	3.01626	0.357601
IPI00198667.7	Clu Clusterin	2	3	2	2.33333	6.711	10.07	6.711	7.83067	1.1272	1.1695	1.09648	1.13106	0.0366633	1.28233	1.19124	1.05682	1.1768	0.113448	1.04044	0.282141	0.0964043	1.08643	1.05682	0.772681	0.971975	0.173228	0.85935	0.124954	0.178222	0.831764	0.92045	0.937562	0.896592	0.056791	0.00314383	0.792702	0.063341
IPI00198717.8	Mdh1 Malate dehydrogenase, cytoplasmic	21	20	18	19.6667	41.62	40.12	38.02	39.92	0.801678	0.436516	0.401791	0.546662	0.221532	0.0731139	0.529663	0.765597	0.456125	0.35205	0.834382	0.364343	0.771828	0.679204	0.946237	1.0666	0.897346	0.19827	1.6415	0.0557065	0.220952	0.824138	0.440555	0.737904	0.667532	0.201242	0.261556	1.22111	0.301471
IPI00198720.1	Idh3a Isocitrate dehydrogenase [NAD] subunit alpha, mitochondrial	13	12	13	12.6667	30.6	28.69	30.87	30.0533	1.24738	0.887156	0.990832	1.04179	0.185441	0.529663	0.698232	0.981748	0.736548	0.228465	0.707002	0.0749095	0.310183	0.963829	1.05682	0.972747	0.997798	0.0513069	0.957772	0.362902	0.0514201	1.09648	0.642688	0.946237	0.895134	0.231171	0.220906	0.859227	0.258253
IPI00198887.1	P4hb Protein disulfide-isomerase	6	11	11	9.33333	12.77	19.06	22.99	18.2733	0.534564	2.88403	2.14783	1.85548	1.20171	1.49969	3.37287	1.1695	2.01402	1.18833	1.08545	0.439401	0.590027	0.824138	1.92309	1.05682	1.26802	0.579119	0.683391	0.251588	0.456712	0.586138	2.88403	2.208	1.89273	1.18094	0.485645	1.02008	0.623939
IPI00198897.1	Ndufa6 NADH dehydrogenase [ubiquinone] 1 alpha subcomplex subunit 6	5	5	5	5	20.77	20.77	26.92	22.82	0.912011	0.862979	0.444631	0.739874	0.25686	0.685488	0.809096	0.691831	0.728805	0.0696062	0.98504	0.474187	0.0955073	0.879022	0.937562	0.855067	0.89055	0.0424386	1.20365	0.208501	0.0476544	0.937562	0.724436	0.549541	0.73718	0.194324	0.494592	0.996359	0.263605
IPI00199636.1	Canx Calnexin	9	9	6	8	16.24	16.07	10.66	14.3233	1.69044	1.09648	1.2942	1.36037	0.302461	3.0761	1.24738	1.28233	1.8686	1.04587	1.3736	0.246492	0.559705	1.40605	1.07647	1.20226	1.22826	0.166322	0.902885	0.276621	0.135413	2.0893	1.10662	1.22462	1.47351	0.536538	0.385134	1.08317	0.364122
IPI00199688.3	Mapk1 Mitogen-activated protein kinase 1	1	1	1	1	2.514	2.514	2.514	2.514	0.937562	1.15878	1.13763	1.07799	0.122072	0.809096	0.981748	1.10662	0.965823	0.149402	0.895949	0.186507	0.154689	0.937562	1.08643	1.13763	1.05387	0.10393	0.977628	0.403806	0.0986169	0.717794	1.39316	1.48594	1.19896	0.419278	0.336288	1.11222	0.349701
IPI00199695.3	Serpinf2 Uncharacterized protein	1	1	1	1	2.648	2.648	2.648	2.648	0.0120226	0.012942	0.0110662	0.0120103	0.000937921	0.794328	0.912011	1.02802	0.911452	0.116845	75.8893	0.00278796	0.128196	0.83946	0.92045	0.963829	0.907913	0.0631252	75.5946	0.000823708	0.0695278	0.990832	0.847227	0.903649	0.913903	0.0723493	0.00106753	76.0934	0.0791652
IPI00199861.1	Dcn Decorin	1	1	1	1	1.412	1.412	1.412	1.412	0.809096	0.92045	0.879022	0.869523	0.0562814	1.36773	1.23595	1.85353	1.48574	0.325265	1.70868	0.038798	0.218925	0.855067	1.08643	1.0666	1.0027	0.128235	1.15316	0.103259	0.12789	0.809096	1.10662	0.698232	0.871317	0.211186	0.4949	1.00206	0.242376
IPI00199865.1	Farsa Phenylalanyl-tRNA synthetase alpha chain	2	2	3	2.33333	4.921	4.921	7.087	5.643	0.457088	0.963829	0.0685488	0.496489	0.448939	0.420727	1.01859	0.177011	0.538776	0.433031	1.08517	0.456095	0.803731	0.224906	0.83946	0.0110662	0.358477	0.430047	0.722025	0.360101	1.19965	1.15878	0.879022	0.544503	0.860767	0.307544	0.159242	1.73371	0.35729
IPI00199887.1	Jph2 Junctophilin-2	6	3	2	3.66667	11.85	7.225	5.925	8.33333	1.1272	0.711214	0.505825	0.781412	0.316579	0.175388	0.724436	0.698232	0.532685	0.309706	0.681696	0.192893	0.581405	1.02802	0.751623	0.57544	0.785026	0.22813	1.00463	0.494021	0.290601	0.937562	1.14815	1.38038	1.15537	0.221499	0.0886469	1.47856	0.191713
IPI00200070.1	Nucb2 Nucleobindin-2	1	1	2	1.33333	2.143	2.143	3.81	2.69867	0.0870964	1.31826	0.0122462	0.472533	0.733374	2.03236	7.04693	1.94089	3.67339	2.92193	7.77383	0.0963818	0.795431	1.36773	1.01859	1.24738	1.21123	0.177354	2.56328	0.109422	0.146424	1.55597	5.49541	0.772681	2.60802	2.53104	0.139357	5.51923	0.970483
IPI00200147.1	Rplp0 60S acidic ribosomal protein P0	1	3	4	2.66667	4.101	11.04	12.93	9.357	1	1.09648	1.30617	1.13422	0.156535	0.937562	0.855067	0.717794	0.836808	0.111016	0.737785	0.030696	0.132666	0.928966	0.855067	0.879022	0.887685	0.0377038	0.782642	0.0524884	0.0424742	0.870964	0.724436	0.92045	0.838616	0.101932	0.0306427	0.73938	0.121548
IPI00200271.1	Ehd4 Uncharacterized protein	5	5	6	5.33333	7.394	8.133	10.17	8.56567	0.937562	0.510505	0.570164	0.672744	0.231271	1.24738	1.31826	1.83654	1.46739	0.321647	2.18121	0.0148748	0.219196	1.07647	0.758578	0.92045	0.918497	0.158953	1.3653	0.106391	0.173057	0.903649	0.586138	0.564937	0.684908	0.189732	0.473676	1.01808	0.277018
IPI00200352.1	Crip2 Cysteine-rich protein 2	7	8	5	6.66667	27.88	35.1	20.67	27.8833	1.09648	0.912011	0.346737	0.785075	0.390656	0.83946	0.816582	0.636796	0.764279	0.110995	0.973511	0.4682	0.145229	1.00925	0.831764	0.0549541	0.63199	0.507547	0.805006	0.350717	0.803093	1.04713	0.903649	1.23595	1.06224	0.166664	0.174271	1.35304	0.156898
IPI00200466.3	Slc25a5 ADP/ATP translocase 2	39	34	35	36	52.68	51.68	51.34	51.9	1	0.928966	0.672977	0.867314	0.172008	0.946237	1.02802	0.879022	0.951092	0.0746153	1.09659	0.25024	0.0784522	0.990832	0.963829	0.879022	0.944561	0.0583419	1.08906	0.262687	0.0617661	0.981748	0.928966	0.831764	0.914159	0.0760806	0.348849	1.05401	0.0832246
IPI00200489.1	Mlycd Isoform Mitochondrial of Malonyl-CoA decarboxylase, mitochondrial	2	2	2	2	4.472	4.472	3.252	4.06533	0.92045	0.824138	0.794328	0.846305	0.0659181	0.895365	0.794328	0.711214	0.800302	0.0922209	0.945642	0.26233	0.115233	0.903649	0.903649	0.765597	0.857632	0.0797048	1.01338	0.429555	0.0929359	1.08643	1.34276	0.990832	1.14001	0.181982	0.0471075	1.34704	0.159632
IPI00200593.1	Serpina3k Serine protease inhibitor A3K	7	8	6	7	20.67	24.04	18.75	21.1533	1.09648	1.1695	0.990832	1.0856	0.0898286	2.07014	1.15878	1.00925	1.41272	0.574228	1.30133	0.214161	0.406469	1.48594	1.11686	1.02802	1.21027	0.24283	1.11484	0.237733	0.200641	0.235505	0.83946	0.855067	0.643344	0.353285	0.0778283	0.592614	0.549139
IPI00200847.1	Tcp1 T-complex protein 1 subunit alpha	2	3	3	2.66667	3.957	6.115	6.115	5.39567	0.737904	1.01859	1.03753	0.931341	0.167789	0.685488	0.870964	0.903649	0.820034	0.11766	0.880487	0.202904	0.143482	0.613762	0.912011	0.972747	0.83284	0.192142	0.894237	0.270429	0.230707	0.801678	1.03753	1.11686	0.985356	0.163941	0.355205	1.058	0.166378
IPI00201060.4	Lmna Prelamin-A/C	9	10	5	8	11.13	13.98	8.722	11.2773	1.48594	6.72977	1.36773	3.19448	3.06222	2.55859	3.31131	1.07647	2.31545	1.13709	0.72483	0.339065	0.491086	1.49969	0.691831	0.731139	0.974218	0.455492	0.30497	0.167759	0.467546	1.10662	4.92039	0.928966	2.31866	2.25492	0.356021	0.725835	0.972508
IPI00201137.1	Cope Coatomer protein complex, subunit epsilon (Predicted), isoform CRA_a	2	2	1	1.66667	4.87	4.87	2.922	4.22067	2.24905	2.48886	2.46604	2.40132	0.132355	0.0172187	0.0143219	0.0135519	0.0150308	0.00193347	0.00625941	0.000510832	0.128634	0.0172187	0.0143219	0.0135519	0.0150308	0.00193347	0.00625941	0.000510832	0.128634	2.63027	2.24905	2.42103	2.43345	0.19091	0.411896	1.01338	0.0784523
IPI00201262.1	Mug1;LOC297568 Alpha-1-inhibitor 3	9	16	15	13.3333	6.567	11.17	10.9	9.54567	0.954993	0.937562	0.870964	0.921173	0.0443472	1.05682	0.928966	0.642688	0.876157	0.212056	0.951133	0.375453	0.242029	1.04713	0.92045	0.717794	0.895124	0.166122	0.971723	0.407412	0.185585	1.07647	0.928966	0.903649	0.969694	0.0933292	0.239122	1.05267	0.0962461
IPI00201300.2	Ptrf Polymerase I and transcript release factor	17	11	12	13.3333	38.01	23.98	27.81	29.9333	0.903649	0.912011	1.1272	0.980953	0.126721	0.666807	1	1.03753	0.901445	0.204067	0.918948	0.301384	0.226378	1.08643	1.01859	1.11686	1.07396	0.050308	1.09481	0.166812	0.0468435	0.937562	0.963829	1.1272	1.00953	0.102747	0.388663	1.02913	0.101777
IPI00201307.1	Uqcrb cytochrome b-c1 complex subunit 7	11	9	8	9.33333	62.16	62.16	55.86	60.06	1.08643	0.387258	0.887156	0.786947	0.360195	0.642688	0.564937	0.879022	0.695549	0.163579	0.883858	0.358836	0.23518	0.92045	0.642688	0.928966	0.830701	0.16288	1.0556	0.430542	0.196076	1.01859	0.570164	0.928966	0.839241	0.237297	0.422722	1.06645	0.282752
IPI00201500.8	Rps14 40S ribosomal protein S14	1	1	1	1	8.609	8.609	8.609	8.609	1.11686	0.879022	0.963829	0.986571	0.12054	0.990832	1.02802	0.660694	0.89318	0.202196	0.905338	0.268834	0.226378	0.887156	1.14815	0.972747	1.00269	0.13305	1.01633	0.442028	0.132693	1.1272	1.35519	1.01859	1.16699	0.171791	0.109326	1.18288	0.147209
IPI00201561.3	Prdx2 Peroxiredoxin-2	5	5	8	6	22.73	22.73	29.29	24.9167	0.990832	0.903649	0.954993	0.949825	0.0438204	0.981748	0.963829	1.01859	0.988056	0.0279207	1.04025	0.141384	0.0282582	0.972747	0.981748	0.928966	0.961154	0.0282361	1.01193	0.364393	0.0293773	0.946237	0.981748	1	0.975995	0.0273393	0.219262	1.02755	0.0280117
IPI00201699.3	Rhoa Transforming protein RhoA	5	4	4	4.33333	26.42	19.17	18.13	21.24	1.00925	0.972747	1.00925	0.997084	0.0210766	1.03753	1.02802	0.928966	0.99817	0.0601206	1.00109	0.489329	0.0602308	0.928966	0.928966	0.672977	0.843636	0.147796	0.846103	0.106025	0.175189	0.92045	0.946237	0.60256	0.823082	0.191413	0.127584	0.825489	0.232556
IPI00201858.4	Pbxip1 Pre-B-cell leukemia transcription factor-interacting protein 1	1	1	1	1	2.078	2.078	2.078	2.078	0.981748	1.0666	1.18032	1.07622	0.0996359	0.972747	1.14815	1.1272	1.0827	0.0957964	1.00602	0.469603	0.0884792	1.08643	1.13763	1.5417	1.25525	0.24939	1.16635	0.171267	0.198677	1.10662	0.981748	0.895365	0.994579	0.106212	0.193368	0.924139	0.106791
IPI00201969.1	Vat1 Vesicle amine transport protein 1 homolog (T californica), isoform CRA_a	1	2	2	1.66667	3.713	6.683	6.683	5.693	1.09648	1.09648	1.19124	1.12807	0.054712	1.70608	0.972747	0.765597	1.14814	0.494167	1.0178	0.475235	0.430406	1.0666	0.744732	0.57544	0.795589	0.249496	0.705268	0.0708459	0.313599	1.02802	1	0.879022	0.969013	0.0791828	0.0263424	0.859004	0.0817149
IPI00202111.1	Usmg5;LOC100366152;LOC100360002 Up-regulated during skeletal muscle growth protein 5	3	3	2	2.66667	43.1	43.1	43.1	43.1	1.05682	1.05682	0.963829	1.02582	0.0536872	0.660694	0.801678	0.801678	0.754683	0.0813975	0.735687	0.0060846	0.107856	0.903649	0.937562	0.887156	0.909456	0.0256997	0.886563	0.0229107	0.0282584	0.794328	0.765597	0.855067	0.804997	0.0456793	0.00300756	0.784734	0.0567446
IPI00202238.1	Ndufb10 Uncharacterized protein	19	18	16	17.6667	61.36	61.36	66.48	63.0667	0.870964	0.319154	0.218776	0.469631	0.351169	0.248886	0.529663	0.801678	0.526742	0.276408	1.12161	0.418116	0.524749	1.14815	1.39316	1.5417	1.361	0.198733	2.89803	0.0143224	0.14602	1.28233	1.19124	1.65959	1.37772	0.248316	0.0129752	2.93362	0.180237
IPI00202270.3	Sgcg Uncharacterized protein	1	1	1	1	6.507	6.507	6.507	6.507	1.04713	1.05682	1.03753	1.04716	0.00964502	0.855067	0.954993	1.0666	0.958885	0.105818	0.915702	0.142445	0.110356	0.92045	0.862979	0.903649	0.895693	0.0295502	0.855355	0.00374549	0.0329915	0.77983	0.608135	0.648634	0.678866	0.0897513	0.00914343	0.648294	0.132208
IPI00202379.1	Farsb Uncharacterized protein	1	1	2	1.33333	1.528	1.528	3.396	2.15067	0.731139	0.809096	0.737904	0.75938	0.0431881	0.972747	1.11686	1.00925	1.03295	0.0749244	1.36026	0.00505095	0.072534	1.1695	1.28233	1.20226	1.21803	0.058045	1.60398	0.00029629	0.0476548	0.636796	0.544503	0.0613762	0.414225	0.309041	0.0953274	0.545478	0.74607
IPI00202512.7	Rpl4 60S ribosomal protein L4	3	4	1	2.66667	5.226	8.551	2.613	5.46333	0.505825	0.972747	0.963829	0.814134	0.267041	1.43219	1.09648	0.847227	1.1253	0.293543	1.3822	0.123284	0.260858	1.72187	1.1272	0.963829	1.27097	0.398946	1.56113	0.0924524	0.313892	4.44631	1.57036	1.11686	2.37785	1.80564	0.135561	2.92071	0.759359
IPI00202543.1	Hk1 Hexokinase-1	13	11	13	12.3333	15.03	12.53	14.81	14.1233	1.07647	0.855067	1.01859	0.983374	0.114824	0.847227	0.862979	1.58489	1.09837	0.421418	1.11694	0.343978	0.383677	0.963829	1.1695	1.21339	1.11557	0.133233	1.13443	0.132145	0.11943	0.903649	0.570164	0.912011	0.795275	0.194996	0.119575	0.80872	0.245194
IPI00202616.1	Ndufs3 Uncharacterized protein	15	15	13	14.3333	43.18	43.94	37.88	41.6667	0.847227	0.461318	0.387258	0.565268	0.246976	0.0862978	0.519996	0.636796	0.414363	0.290053	0.733039	0.265626	0.699997	0.711214	0.794328	0.636796	0.714112	0.0788063	1.26332	0.204679	0.110356	0.887156	0.648634	0.648634	0.728142	0.137711	0.194562	1.28814	0.189126
IPI00202658.1	Hibadh 3-hydroxyisobutyrate dehydrogenase, mitochondrial	4	2	4	3.33333	17.31	8.358	13.43	13.0327	0.990832	0.954993	0.301995	0.749273	0.387768	0.794328	0.870964	0.642688	0.769326	0.116174	1.02676	0.469186	0.151007	0.92045	0.981748	0.794328	0.898842	0.09556	1.19962	0.288357	0.106315	0.801678	0.887156	0.685488	0.791441	0.101223	0.435193	1.05628	0.127897
IPI00203054.2	Acsf2 Acyl-CoA synthetase family member 2, mitochondrial	9	9	9	9	16.91	18.86	18.7	18.1567	1.09648	0.636796	0.954993	0.896089	0.235434	0.666807	0.92045	1.01859	0.868616	0.18153	0.969341	0.440534	0.208988	0.816582	0.847227	0.990832	0.884881	0.0930272	0.987492	0.472182	0.10513	0.903649	0.205116	0.954993	0.687919	0.418907	0.252587	0.767691	0.608948
IPI00203137.1	Mdp1 Uncharacterized protein	1	1	2	1.33333	6.707	6.707	14.63	9.348	1.1272	1.24738	0.954993	1.10986	0.146964	1.2942	1.48594	1.0666	1.28224	0.209925	1.15532	0.15783	0.163717	0.870964	0.954993	0.972747	0.932901	0.0543691	0.840559	0.0809715	0.0582796	0.879022	0.751623	1.03753	0.889391	0.143234	0.0681649	0.801356	0.161048
IPI00203214.6	Eef2 Elongation factor 2	15	16	13	14.6667	16.55	18.88	16.32	17.25	1.03753	0.679204	0.461318	0.726016	0.290944	1.80302	0.816582	0.691831	1.10381	0.608736	1.52037	0.203305	0.551486	1.47231	0.534564	0.554626	0.853834	0.535712	1.17605	0.369974	0.627419	1.30617	1.1695	1.49969	1.32512	0.165906	0.0247269	1.82519	0.125201
IPI00203232.6	Macrod1 MACRO domain-containing protein 1	6	3	3	4	19.81	13.93	13.93	15.89	1.02802	1.21339	1.01859	1.08667	0.109847	1.04713	1.07647	1.19124	1.10495	0.0761609	1.01682	0.412872	0.0689273	0.937562	0.937562	0.963829	0.946318	0.0151653	0.870846	0.0775025	0.0160255	1.0666	0.816582	0.457088	0.780089	0.306388	0.109404	0.717874	0.392761
IPI00203250.1	Dpysl3 Isoform 2 of Dihydropyrimidinase-related protein 3	2	2	2	2	3.367	3.367	3.367	3.367	1	1.01859	1.28233	1.10031	0.157911	1.34276	0.855067	1.14815	1.11533	0.245501	1.01365	0.466978	0.220115	1.1272	0.928966	1.0666	1.04092	0.101579	0.946027	0.308814	0.0975862	0.870964	1.04713	1.47231	1.13013	0.309148	0.445601	1.02711	0.27355
IPI00203352.1	Bzw2 Basic leucine zipper and W2 domain-containing protein 2	1	1	1	1	2.148	2.148	2.148	2.148	1.05682	0.816582	0.990832	0.954744	0.124117	1.02802	0.765597	0.855067	0.882893	0.133404	0.924743	0.266152	0.151099	1.13763	1.00925	0.981748	1.04288	0.0832013	1.09231	0.186198	0.0797806	1.07647	0.937562	1.51356	1.17586	0.300589	0.166699	1.2316	0.255633
IPI00203390.3	Ppp1cb Serine/threonine-protein phosphatase PP1-beta catalytic subunit	3	3	2	2.66667	11.01	10.09	7.034	9.378	1.1272	0.972747	1.39316	1.16437	0.212655	1.15878	1.09648	1.92309	1.39278	0.460317	1.19617	0.247762	0.330502	1.20226	1.0666	1.65959	1.30948	0.310695	1.12463	0.272706	0.237266	0.831764	0.831764	0.390841	0.684789	0.254567	0.0342174	0.588121	0.371745
IPI00203443.3	Ptgr1 Prostaglandin reductase 1	1	2	3	2	4.255	7.903	10.33	7.496	0.981748	1.08643	0.963829	1.01067	0.0662176	0.963829	0.972747	0.92045	0.952342	0.0279772	0.94229	0.132121	0.0293773	0.870964	0.903649	0.887156	0.887256	0.0163431	0.877891	0.038197	0.0184199	0.887156	0.946237	1.10662	0.980006	0.113564	0.355789	0.969662	0.115881
IPI00203690.5	Aldh9a1 4-trimethylaminobutyraldehyde dehydrogenase	4	2	4	3.33333	9.213	4.798	8.637	7.54933	0.981748	0.731139	0.981748	0.898212	0.144689	0.954993	0.870964	0.946237	0.924064	0.0461946	1.02878	0.395849	0.0499907	0.963829	0.801678	1.02802	0.931174	0.116649	1.0367	0.38734	0.125271	1.00925	0.937562	1.04713	0.997981	0.0556464	0.17899	1.11108	0.055759
IPI00203881.5	Sgca Uncharacterized protein	2	0	1	1	6.977	0	2.584	3.187	1.11686	1.15878	1.03753	1.10439	0.0615794	0.972747	1.1272	1.02802	1.04265	0.0782589	0.9441	0.173235	0.0750574	1.10662	1.20226	1.1695	1.15946	0.0486035	1.04987	0.147094	0.041919	0.981748	0.698232	0.972747	0.884243	0.161152	0.0644228	0.800662	0.182249
IPI00203972.2	Gys1 Glycogen [starch] synthase, muscle	4	3	3	3.33333	5.827	4.607	4.607	5.01367	1.04713	1.19124	1.14815	1.12884	0.073972	1	1.18032	1.40605	1.19546	0.203447	1.05901	0.318699	0.170183	1.10662	1.27057	1.40605	1.26108	0.149938	1.11715	0.133277	0.118896	1.0666	0.870964	1.19124	1.04293	0.161445	0.233739	0.923897	0.154799
IPI00204261.2	Kpnb1 Uncharacterized protein	3	3	2	2.66667	4.68	4.68	2.968	4.10933	0.654636	0.619441	0.366438	0.546838	0.157219	1.05682	1.01859	1.05682	1.04408	0.0220703	1.9093	0.0148529	0.0211386	0.847227	0.862979	1.08643	0.932211	0.133786	1.70473	0.0165281	0.143515	1.10662	1.2942	1.1272	1.17601	0.102871	0.00343531	2.15056	0.0874751
IPI00204316.1	Atp5j ATP synthase-coupling factor 6, mitochondrial	6	6	6	6	46.3	50	50	48.7667	0.831764	0.691831	0.608135	0.710577	0.112987	0.0862978	0.672977	0.625173	0.461482	0.325797	0.649448	0.15807	0.70598	0.57544	0.758578	0.648634	0.660884	0.0921813	0.930067	0.29398	0.139482	0.554626	0.613762	0.711214	0.626534	0.0790713	0.178569	0.881726	0.126204
IPI00204344.1	Bckdk [3-methyl-2-oxobutanoate dehydrogenase [lipoamide]] kinase, mitochondrial	1	1	1	1	2.67	2.67	2.67	2.67	0.816582	0.903649	0.895365	0.871866	0.0480555	0.751623	0.862979	0.972747	0.86245	0.110563	0.9892	0.450869	0.128197	0.672977	0.744732	0.77983	0.732513	0.0544646	0.840167	0.0149904	0.0743531	0.787046	0.672977	0.717794	0.725939	0.057469	0.0146496	0.832627	0.0791651
IPI00204365.2	Rpn1 Ribophorin1	1	5	1	2.33333	2.475	6.436	2.475	3.79533	1	1.28233	1.1272	1.13651	0.141396	0.801678	1.38038	1.25892	1.147	0.305158	1.00923	0.480264	0.26605	1	1.20226	1.21339	1.13855	0.120118	1.0018	0.492865	0.1055	0.912011	1.09648	0.870964	0.959817	0.120118	0.0881189	0.844531	0.125147
IPI00204641.1	Ndufb9 Uncharacterized protein	9	4	3	5.33333	38.55	29.05	21.79	29.7967	1.65959	0.954993	1	1.20486	0.394448	0.487529	0.937562	1.01859	0.814561	0.286101	0.676062	0.12203	0.351234	1.33045	0.963829	1.01859	1.10429	0.197767	0.916531	0.359929	0.17909	0.60256	0.887156	0.954993	0.814903	0.186996	0.112008	0.676346	0.229471
IPI00204703.5	Serpinh1 Serpin H1	4	8	9	7	13.43	24.46	27.82	21.9033	1.00925	2.24905	2.31206	1.85679	0.734665	1.38038	1.23595	0.724436	1.11359	0.344667	0.599738	0.107952	0.30951	1.10662	1.13763	0.870964	1.0384	0.145835	0.559247	0.0948011	0.140441	1.09648	1.99526	2.01372	1.70182	0.524324	0.391227	0.916539	0.308096
IPI00205018.3	Aldh6a1 Methylmalonate-semialdehyde dehydrogenase [acylating], mitochondrial	25	24	24	24.3333	30.47	33.83	36.45	33.5833	0.937562	0.270396	0.343558	0.517172	0.365902	0.319154	0.554626	0.648634	0.507471	0.169726	0.981243	0.484771	0.334455	0.654636	0.787046	1.00925	0.816978	0.179193	1.5797	0.147402	0.219337	0.765597	0.280543	0.383707	0.476616	0.255525	0.441706	0.921581	0.536124
IPI00205036.1	Hba2 hemoglobin alpha 2 chain	51	33	39	41	71.13	67.61	72.54	70.4267	1.0666	0.963829	0.483059	0.837828	0.311506	1.51356	0.847227	0.534564	0.965118	0.500032	1.15193	0.365343	0.518105	0.954993	0.870964	0.444631	0.756862	0.273645	0.903363	0.376236	0.361551	1	0.92045	1.03753	0.985993	0.0597829	0.24917	1.17684	0.0606322
IPI00205076.1	Lonp1 Lon protease homolog, mitochondrial	1	1	2	1.33333	1.158	1.158	2.526	1.614	0.990832	1.13763	0.954993	1.02782	0.0967717	1.03753	1.20226	0.794328	1.01137	0.205222	0.984001	0.45422	0.202914	1.07647	1.15878	1.02802	1.08775	0.0661073	1.05831	0.215945	0.0607742	0.954993	0.744732	0.981748	0.893824	0.129809	0.115281	0.869633	0.145229
IPI00205157.1	Hadh Hydroxyacyl-coenzyme A dehydrogenase, mitochondrial	14	12	15	13.6667	38.54	34.39	46.5	39.81	0.711214	0.0724436	0.244343	0.342667	0.330541	0.0524807	0.120226	0.363078	0.178595	0.163318	0.521192	0.249173	0.914461	0.515229	0.366438	0.529663	0.470443	0.0903602	1.37289	0.288479	0.192075	0.809096	0.291072	0.847227	0.649132	0.310675	0.153565	1.89435	0.4786
IPI00205193.2	Ccdc56 Uncharacterized protein	1	1	1	1	9.259	9.259	9.259	9.259	1.20226	0.724436	0.711214	0.879304	0.279769	0.0717794	0.0131826	0.0114815	0.0321478	0.0343325	0.0365605	0.0164219	1.06796	1.15878	0.636796	0.666807	0.820793	0.293087	0.933457	0.407419	0.357078	0.49204	1.15878	1.23595	0.962255	0.409042	0.394037	1.09434	0.425087
IPI00205241.1	Myoz2 Uncharacterized protein	10	5	11	8.66667	24.24	18.18	30.3	24.24	1.07647	0.737904	0.704693	0.839687	0.205727	0.946237	0.679204	0.928966	0.851469	0.149436	1.01403	0.47012	0.175504	1.04713	0.737904	0.92045	0.901828	0.155451	1.074	0.34966	0.172373	0.946237	0.711214	1.22462	0.960689	0.257006	0.280268	1.1441	0.267523
IPI00205332.4	Etfa Electron transfer flavoprotein subunit alpha, mitochondrial	12	12	15	13	45.35	45.95	54.95	48.75	0.981748	0.501187	0.672977	0.718637	0.243512	0.337287	0.465586	0.613762	0.472212	0.138356	0.657093	0.110074	0.292996	0.801678	0.847227	0.946237	0.865048	0.0739087	1.20373	0.204896	0.0854389	0.801678	0.270396	0.319154	0.463743	0.293674	0.156806	0.645308	0.63327
IPI00205374.1	Hmgcl Hydroxymethylglutaryl-CoA lyase, mitochondrial	1	1	1	1	4.308	4.308	4.308	4.308	1.01859	1.10662	1.08643	1.07055	0.0461146	0.816582	0.912011	1	0.909531	0.0917339	0.849595	0.0370628	0.100859	1.04713	1.11686	1.15878	1.10759	0.0563987	1.0346	0.215024	0.0509202	0.912011	0.787046	0.83946	0.846172	0.0627523	0.00469983	0.790411	0.0741602
IPI00205394.1	Timm44 Mitochondrial import inner membrane translocase subunit TIM44	4	3	3	3.33333	8.609	5.96	5.96	6.843	1.0666	1.25892	1.1695	1.16501	0.0962431	1.07647	1.59956	1.45881	1.37828	0.270686	1.18307	0.152381	0.196394	1.01859	1.28233	1.15878	1.15323	0.131957	0.989894	0.453596	0.114424	0.937562	0.879022	1.14815	0.988246	0.141544	0.0788977	0.848275	0.143227
IPI00205413.1	Slc25a20 Mitochondrial carnitine/acylcarnitine carrier protein	3	2	4	3	14.29	10.3	17.61	14.0667	0.990832	1.05682	0.77983	0.942493	0.144683	0.937562	1.07647	1.03753	1.01719	0.0716512	1.07925	0.241459	0.0704407	0.946237	1.04713	1	0.997789	0.0504823	1.05867	0.292337	0.0505942	0.981748	0.887156	0.831764	0.900223	0.0758411	0.342099	0.95515	0.084247
IPI00205466.1	Cand1 Cullin-associated NEDD8-dissociated protein 1	1	1	2	1.33333	0.9756	0.9756	1.382	1.11107	8.70964	2.65461	1.58489	4.31638	3.84208	0.990832	0.57544	1.83654	1.13427	0.642669	0.262783	0.143277	0.566592	8.79023	2.72898	1.72187	4.41369	3.82349	1.02254	0.488342	0.86628	9.81748	1.88799	1.33045	4.34531	4.74723	0.496931	1.0067	1.0925
IPI00205489.1	Hspb6 Heat shock protein beta-6	4	4	3	3.66667	27.78	27.78	19.75	25.1033	0.990832	0.47863	0.862979	0.77748	0.26659	1.2942	0.831764	0.981748	1.0359	0.235925	1.33238	0.138987	0.227748	1.11686	1.00925	0.895365	1.00716	0.110764	1.29542	0.136147	0.109976	0.831764	0.529663	1.03753	0.799652	0.255451	0.461089	1.02852	0.319452
IPI00205598.1	Grpel1 GrpE protein homolog 1, mitochondrial	3	1	1	1.66667	17.51	4.147	5.069	8.90867	0.870964	0.801678	0.744732	0.805791	0.0632162	0.83946	0.83946	0.816582	0.831834	0.0132084	1.03232	0.276036	0.0158787	0.990832	0.887156	0.105682	0.661223	0.483898	0.820589	0.328724	0.731822	0.855067	0.816582	0.109648	0.593766	0.4197	0.237339	0.736873	0.706844
IPI00205681.1	Mtp18 Uncharacterized protein	1	1	1	1	6.627	6.627	6.627	6.627	0.887156	0.981748	0.963829	0.944244	0.0502452	0.698232	0.801678	0.903649	0.801187	0.102709	0.848495	0.0608535	0.128197	0.928966	1.02802	1.07647	1.01115	0.075182	1.07086	0.139268	0.074353	0.855067	0.731139	0.77983	0.788679	0.0624358	0.0151243	0.835249	0.0791651
IPI00205916.3	Coq3 Hexaprenyldihydroxybenzoate methyltransferase, mitochondrial	1	1	1	1	4.928	4.928	4.928	4.928	0.654636	0.724436	0.711214	0.696762	0.0370762	0.77983	0.895365	1.00925	0.894816	0.114712	1.28425	0.0421365	0.128197	0.0120226	0.011695	0.011272	0.0116632	0.000376338	0.0167392	0.000486899	0.0322671	0.816582	0.698232	0.744732	0.753182	0.0596258	0.124669	1.08098	0.0791651
IPI00205990.5	Ppp5c Serine/threonine-protein phosphatase 5	1	1	1	1	2.605	2.605	2.605	2.605	0.928966	1.02802	1.00925	0.988745	0.0526131	0.937562	1.07647	1.21339	1.07581	0.137915	1.08805	0.196677	0.128197	0.990832	1.08643	1.14815	1.07514	0.0792662	1.08738	0.100692	0.0737266	0.963829	0.824138	0.879022	0.888997	0.0703775	0.0631739	0.899116	0.0791651
IPI00206010.1	Rras Ras-related protein R-Ras	2	2	2	2	12.84	12.84	10.55	12.0767	1	1.01859	1.15878	1.05912	0.0868023	1.1695	1.14815	1.1695	1.16238	0.0123236	1.0975	0.0866021	0.010602	1.03753	1.10662	1.23595	1.1267	0.100721	1.0638	0.214712	0.0893951	1.11686	1.04713	1.19124	1.11841	0.0720689	0.207909	1.05598	0.0644387
IPI00206020.1	Lrrc59 Leucine-rich repeat-containing protein 59	1	1	1	1	3.257	3.257	3.257	3.257	0.903649	1.35519	9.37562	3.87815	4.7663	1.49969	1.6293	20.7014	7.94346	11.0489	2.04826	0.301708	1.39094	0.895365	1.05682	1.08643	1.01287	0.102833	0.261173	0.203553	0.101527	1	1.28233	7.58578	3.28937	3.72347	0.43737	0.848179	1.13197
IPI00206193.1	Fhl2 Four and a half LIM domains protein 2	2	1	2	1.66667	6.452	2.509	6.452	5.13767	1	0.972747	0.972747	0.981831	0.0157344	0.597035	0.831764	0.912011	0.78027	0.16368	0.794709	0.0827083	0.209773	0.954993	1.04713	0.972747	0.991623	0.0488825	1.00997	0.383882	0.0492955	0.870964	0.731139	0.801678	0.80126	0.0699132	0.020412	0.816087	0.087254
IPI00206224.1	Dars Aspartyl-tRNA synthetase, cytoplasmic	1	1	2	1.33333	2.196	2.196	3.992	2.79467	1.04713	0.77983	4.61318	2.14671	2.1402	1.49969	0.744732	0.534564	0.926327	0.50754	0.43151	0.214531	0.547906	0.981748	0.772681	2.37684	1.37709	0.872097	0.641488	0.304717	0.63329	1.1272	0.862979	0.534564	0.84158	0.296896	0.200889	0.392032	0.352784
IPI00206403.1	Lum Lumican	6	6	5	5.66667	17.16	17.16	14.5	16.2733	0.765597	1.94089	1.10662	1.27104	0.604648	1.95885	2.75423	1.07647	1.92985	0.839258	1.51833	0.168786	0.434883	1.05682	1.92309	0.946237	1.30872	0.534931	1.02965	0.469753	0.408745	1.36773	1.99526	1.07647	1.47982	0.469542	0.331354	1.16426	0.317297
IPI00206624.1	Hspa5 78 kDa glucose-regulated protein	20	23	23	22	30.89	35.02	35.32	33.7433	0.879022	0.928966	1.00925	0.939081	0.0657018	1.97697	1.08643	1.00925	1.35755	0.53782	1.44562	0.154773	0.396169	1.11686	0.990832	0.937562	1.01509	0.0920782	1.08094	0.157739	0.0907098	1.11686	1.09648	1.03753	1.08362	0.0412001	0.0205365	1.15392	0.0380207
IPI00206780.1	Plg Plasminogen	2	4	2	2.66667	2.094	6.034	2.094	3.40733	0.879022	1.20226	0.457088	0.846125	0.373676	1.70608	1.03753	1.08643	1.27668	0.372677	1.50885	0.115258	0.291911	0.855067	0.990832	0.809096	0.884998	0.094493	1.04594	0.437888	0.106772	0.524808	0.990832	0.376704	0.630781	0.320486	0.245877	0.745494	0.508078
IPI00206977.1	Cs Citrate synthase, mitochondrial	29	25	25	26.3333	43.35	38.84	38.84	40.3433	0.758578	0.190546	0.192309	0.380478	0.327445	0.155597	0.505825	0.461318	0.374246	0.190659	0.983622	0.489476	0.509449	0.496592	0.679204	0.654636	0.610144	0.0991029	1.60363	0.174418	0.162425	0.625173	0.328095	0.291072	0.41478	0.183143	0.441908	1.09016	0.441544
IPI00207003.1	Aco1 Cytoplasmic aconitate hydratase	3	2	1	2	4.949	4.049	1.912	3.63667	0.895365	0.0457088	0.0110662	0.31738	0.500849	1.0666	0.519996	1.88799	1.15819	0.688582	3.64924	0.0845584	0.594531	0.946237	0.642688	1.75388	1.11427	0.574338	3.51083	0.0728316	0.515439	0.972747	0.144544	0.0110662	0.376119	0.520987	0.44743	1.18508	1.38517
IPI00207050.5	Rcn3 reticulocalbin 3, EF-hand calcium binding domain	2	4	3	3	4.268	12.8	11.28	9.44933	14.1906	4.57088	6.0256	8.26235	5.18526	17.8649	3.69828	1.69044	7.7512	8.81605	0.938135	0.468051	1.13738	6.08135	2.99226	2.65461	3.90941	1.88852	0.473159	0.140466	0.483071	13.4277	3.94457	3.98107	7.11777	5.46455	0.402727	0.86147	0.767734
IPI00207146.1	Hbb-b1 Zero beta-1 globin	29	32	31	30.6667	82.99	84.35	73.47	80.27	1.09648	1.2942	1.43219	1.27429	0.168738	1.45881	1.01859	1.55597	1.34446	0.286358	1.05507	0.368602	0.212992	1.0666	0.824138	1.08643	0.992387	0.146045	0.778778	0.0476538	0.147165	1.23595	1	1.43219	1.22271	0.216398	0.381003	0.959526	0.176982
IPI00207217.1	Echs1 Enoyl-CoA hydratase, mitochondrial	8	9	9	8.66667	28.28	30.34	32.41	30.3433	0.591562	0.194089	0.263027	0.349559	0.212396	0.16293	0.359749	0.660694	0.394457	0.25069	1.12844	0.412414	0.635532	0.597035	0.580764	0.672977	0.616925	0.0492188	1.76487	0.0775861	0.0797808	0.737904	0.267917	0.559758	0.52186	0.237275	0.201172	1.49291	0.454671
IPI00207275.1	Apom Apolipoprotein M	1	1	1	1	3.684	3.684	3.684	3.684	1.19124	1.36773	99.0832	33.8807	56.4671	1.10662	1.18032	99.0832	33.79	56.5455	0.997324	0.499263	1.67344	1.14815	1.21339	99.0832	33.8149	56.524	0.998058	0.499465	1.67157	1.20226	1.1272	99.0832	33.8042	56.5333	0.499378	0.997742	1.67237
IPI00207335.1	Pafah1b2 Platelet-activating factor acetylhydrolase IB subunit beta	2	1	1	1.33333	6.987	3.057	3.93	4.658	0.60256	0.824138	0.685488	0.704062	0.111951	1.00925	1.03753	0.0110662	0.685949	0.584637	0.974274	0.481233	0.852303	0.698232	0.972747	0.809096	0.826692	0.138101	1.17417	0.150393	0.167052	0.37325	0.0113763	0.831764	0.405463	0.411141	0.16746	0.575892	1.014
IPI00207390.9	Anxa3 Annexin A3	3	2	4	3	13.58	10.8	18.52	14.3	0.903649	0.824138	0.92045	0.882746	0.0514461	0.937562	0.928966	1.03753	0.968019	0.06035	1.0966	0.0689004	0.0623438	0.937562	0.92045	1.02802	0.962009	0.0578003	1.08979	0.0758292	0.0600829	0.879022	0.801678	0.809096	0.829932	0.0426749	0.12262	0.940171	0.0514198
IPI00207657.1	Usp5 Ubiquitin carboxyl-terminal hydrolase	2	3	3	2.66667	3.263	4.662	4.662	4.19567	0.963829	0.895365	0.963829	0.941008	0.0395278	1.15878	1.04713	1.27057	1.15883	0.111722	1.23147	0.0321751	0.09641	1.30617	1.09648	1.21339	1.20535	0.105078	1.28091	0.0179554	0.0871763	1.05682	1.13763	1.20226	1.13224	0.0728727	0.0133502	1.20322	0.0643617
IPI00207668.1	Afm Afamin	3	3	3	3	6.743	6.414	5.921	6.35933	0.824138	1.34276	0.801678	0.989527	0.306119	0.717794	1.6293	0.744732	1.03061	0.518654	1.04152	0.456448	0.503251	0.487529	0.197697	0.660694	0.44864	0.233935	0.453388	0.0381232	0.521432	0.92045	0.436516	0.666807	0.674591	0.242061	0.119146	0.68173	0.358826
IPI00207890.1	Fabp4 Adipocyte lipid-binding protein	9	9	7	8.33333	26.67	27.33	27.33	27.11	0.816582	0.613762	0.855067	0.761804	0.129644	0.325087	0.772681	0.928966	0.675578	0.313431	0.886814	0.34647	0.463945	0.586138	0.704693	0.855067	0.715299	0.134778	0.938955	0.34445	0.188421	0.887156	0.831764	1.02802	0.915645	0.10118	0.0923301	1.20194	0.110502
IPI00208026.1	Selenbp1 Selenium-binding protein 1	2	3	2	2.33333	4.873	6.992	5.085	5.65	1.1272	1.15878	0.946237	1.0774	0.114686	1	1.00925	0.928966	0.979406	0.0439267	0.909043	0.137319	0.0448503	1.09648	1.09648	0.954993	1.04932	0.0816866	0.97393	0.374434	0.0778475	1.03753	0.981748	1.04713	1.02213	0.0353041	0.24848	0.948702	0.0345396
IPI00208118.1	Cald1 Non-muscle caldesmon	2	4	4	3.33333	4.896	4.896	7.156	5.64933	1.09648	1.39316	1.92309	1.47091	0.418756	1.2942	1.36773	0.691831	1.11792	0.37083	0.760019	0.168309	0.331715	1.01859	1.00925	0.711214	0.913019	0.174831	0.620718	0.0669654	0.191487	0.946237	1.49969	0.981748	1.14256	0.309791	0.170551	0.776769	0.271139
IPI00208123.4	Sub1 Activated RNA polymerase II transcriptional coactivator p15	1	1	1	1	8.661	8.661	8.661	8.661	1.19124	0.937562	0.937562	1.02212	0.146462	1.57036	1	0.831764	1.13404	0.387115	1.1095	0.338225	0.341358	1.21339	1.09648	0.912011	1.07396	0.151946	1.05072	0.346219	0.141482	1.03753	1.35519	1.07647	1.15639	0.173259	0.182372	1.13137	0.149827
IPI00208203.2	Eci2 Enoyl-CoA delta isomerase 2, mitochondrial	5	4	2	3.66667	13.81	11.76	4.859	10.143	1.52757	1.10662	2.91072	1.8483	0.943844	0.416869	0.990832	2.67917	1.36229	1.176	0.737049	0.303879	0.863255	0.954993	1.01859	3.87258	1.94872	1.66641	1.05433	0.466543	0.855131	0.895365	0.809096	0.954993	0.886484	0.0733526	0.109512	0.479621	0.0827455
IPI00208205.1	Hspa8 Heat shock cognate 71 kDa protein	31	32	26	29.6667	40.87	42.88	37.15	40.3	1.22462	0.954993	0.963829	1.04781	0.15318	1.40605	1.05682	1.00925	1.15737	0.216668	1.10456	0.259069	0.187207	1.18032	1	0.972747	1.05102	0.112802	1.00306	0.4891	0.107326	0.758578	0.928966	0.981748	0.889764	0.116636	0.116457	0.849163	0.131086
IPI00208215.2	Prdx3 Thioredoxin-dependent peroxide reductase, mitochondrial	12	9	9	10	30.35	26.07	26.07	27.4967	0.954993	1.0666	1.0666	1.02939	0.0644343	0.270396	0.501187	0.981748	0.584444	0.362911	0.567755	0.082037	0.620951	0.691831	1	1.03753	0.909786	0.189685	0.883807	0.196008	0.208494	0.912011	0.570164	1.05682	0.846331	0.249887	0.16575	0.822164	0.295259
IPI00208304.1	Sept2 Septin-2	1	3	2	2	3.324	10.25	6.371	6.64833	0.887156	1.1695	1.40605	1.15423	0.259783	1.30617	1.77011	1.94089	1.67239	0.328448	1.44892	0.0511914	0.196394	0.879022	1.15878	1.38038	1.13939	0.251242	0.987143	0.473359	0.220505	0.990832	1.48594	1.61436	1.36371	0.329243	0.219117	1.18148	0.241432
IPI00208598.1	Hdlbp Vigilin	1	1	1	1	0.9464	0.9464	0.9464	0.9464	1.04713	1.1695	1.14815	1.12159	0.0653657	1.35519	1.55597	1.75388	1.55501	0.199348	1.38643	0.0261511	0.128197	1	1.10662	1.15878	1.08847	0.0809308	0.970464	0.305924	0.074353	0.711214	0.608135	0.648634	0.655994	0.0519319	0.00040851	0.584877	0.0791652
IPI00208784.5	Flot1 Isoform 1 of Flotillin-1	3	3	2	2.66667	9.112	9.112	5.607	7.94367	0.903649	0.801678	0.946237	0.883855	0.0742845	0.92045	0.887156	0.92045	0.909352	0.0192221	1.02885	0.308479	0.0211382	1.00925	1.00925	1.39316	1.13722	0.221647	1.28666	0.0888432	0.194902	0.946237	1.02802	1.15878	1.04434	0.107207	0.0542741	1.18158	0.102654
IPI00209113.3	Myh9 Myosin-9	4	8	6	6	2.958	5.456	3.927	4.11367	0.981748	1.23595	1.05682	1.0915	0.130601	1.1695	0.887156	0.937562	0.998072	0.150584	0.914401	0.231635	0.150875	1.03753	0.937562	0.928966	0.968019	0.06035	0.886867	0.119741	0.0623438	0.903649	1.10662	1.07647	1.02891	0.109524	0.280154	0.942656	0.106447
IPI00209115.2	Slc25a3 Uncharacterized protein	30	24	23	25.6667	42.86	40.9	42.3	42.02	0.60256	0.231207	0.265461	0.366409	0.205228	0.122462	0.436516	0.554626	0.371201	0.223363	1.01308	0.489745	0.60173	0.554626	0.580764	0.608135	0.581175	0.026757	1.58614	0.104976	0.0460395	0.685488	0.580764	0.660694	0.642315	0.0547274	0.0687388	1.753	0.0852033
IPI00209291.1	Esyt1 Extended synaptotagmin-1	1	1	2	1.33333	1.195	1.195	2.298	1.56267	1.11686	1.18032	9.81748	4.03822	5.00508	1	1.72187	12.1339	4.95192	6.23023	1.22626	0.426553	1.25814	1.00925	0.954993	8.31764	3.42729	4.23525	0.848714	0.439907	1.23574	0.77983	0.0120226	0.928966	0.573606	0.492029	0.176582	0.142044	0.857782
IPI00209789.1	Fkbp3 peptidyl-prolyl cis-trans isomerase FKBP3	1	1	1	1	3.571	3.571	3.571	3.571	1.03753	0.895365	1.07647	1.00312	0.0953273	1.00925	0.751623	0.981748	0.914208	0.141473	0.911365	0.212181	0.154749	1.0666	0.912011	0.954993	0.977866	0.0797907	0.974826	0.371615	0.0815968	0.903649	0.895365	0.92045	0.906488	0.012781	0.109797	0.903669	0.0140995
IPI00209848.1	Cstb Cystatin-B	1	2	2	1.66667	11.22	16.33	12.24	13.2633	87.9023	83.946	0.928966	57.5924	49.1118	87.9023	81.6582	0.847227	56.8026	48.5592	0.986286	0.492573	0.854877	87.9023	83.1764	0.636796	57.2385	49.0754	0.993855	0.496689	0.857385	87.9023	64.2688	0.954993	51.042	44.9574	0.436514	0.886263	0.880792
IPI00209893.5	RGD1308772 Uncharacterized protein	3	4	4	3.66667	1.89	2.205	1.995	2.03	1.18032	87.9023	23.1206	37.4011	45.0901	1.1272	87.9023	21.677	36.9022	45.3468	0.986661	0.494933	1.22884	1.21339	87.0964	24.8886	37.7328	44.3588	1.00887	0.496594	1.1756	1.07647	85.5067	31.9154	39.4995	42.723	0.478077	1.05611	1.08161
IPI00209938.1	Nexn Isoform 1 of Nexilin	4	4	2	3.33333	5.03	4.878	2.744	4.21733	1.0666	0.928966	1.18032	1.05863	0.125867	1.15878	1.10662	1.05682	1.10741	0.050984	1.04608	0.291706	0.0460391	1.1272	1.0666	0.972747	1.05551	0.0778195	0.997058	0.4865	0.0737266	1.00925	1.14815	1.04713	1.06818	0.0718031	0.457973	1.00902	0.0672201
IPI00209980.6	Pmpcb Mitochondrial-processing peptidase subunit beta	1	2	3	2	2.045	4.499	6.953	4.499	0.990832	0.912011	1.20226	1.03504	0.150091	0.92045	0.724436	1.02802	0.890967	0.153922	0.860808	0.155178	0.172759	0.862979	0.903649	1.27057	1.0124	0.224508	0.978131	0.446282	0.221758	0.981748	1.21339	1.69044	1.29519	0.361359	0.171052	1.25135	0.279
IPI00210090.3	Hnrnpu SP120	2	3	2	2.33333	3.634	5.514	2.882	4.01	1.21339	1.07647	0.685488	0.991781	0.27395	1.77011	1.21339	0.0275423	1.00368	0.89001	1.012	0.492032	0.886747	0.175388	1.15878	0.724436	0.6862	0.492808	0.691887	0.207269	0.71817	0.218776	1.61436	1.1695	1.00088	0.712908	0.492515	1.00917	0.712282
IPI00210120.2	Vtn Uncharacterized protein	2	2	1	1.66667	6.122	6.122	2.449	4.89767	1.40605	34.3558	1.2942	12.352	19.0559	1.19124	11.9124	0.903649	4.6691	6.27454	0.378004	0.282296	1.34384	1.24738	22.4905	0.972747	8.23689	12.3448	0.666846	0.385869	1.49872	1.59956	28.3139	1.1272	10.3469	15.5617	0.447412	0.837669	1.504
IPI00210187.1	Pdlim5 PDZ and LIM domain protein 5	10	9	12	10.3333	12.01	12.86	19.46	14.7767	0.990832	1.10662	1.20226	1.09991	0.105876	0.946237	1.08643	1.1272	1.05329	0.0949229	0.957615	0.300415	0.0901206	1.02802	1.1272	1.0666	1.07394	0.0499968	0.976389	0.363856	0.0465547	0.831764	0.711214	1.02802	0.856998	0.159902	0.0518154	0.779155	0.186583
IPI00210238.3	Rps23 40S ribosomal protein S23	1	1	1	1	7.692	7.692	7.692	7.692	1.57036	0.963829	1.72187	1.41869	0.401136	1.78649	1.28233	2.29087	1.78656	0.504269	1.25931	0.190667	0.282256	1.51356	1.07647	1.7378	1.44261	0.336329	1.01686	0.470412	0.233139	1.47231	1.1695	1.34276	1.32819	0.151932	0.371418	0.936212	0.11439
IPI00210351.2	Ak1 Adenylate kinase isoenzyme 1	10	6	8	8	55.67	39.18	44.33	46.3933	0.912011	0.21677	0.816582	0.648455	0.376882	0.496592	1.0666	0.831764	0.798317	0.28647	1.23111	0.307304	0.358842	0.981748	1.21339	0.912011	1.03572	0.157771	1.59721	0.104943	0.15233	0.879022	0.301995	0.847227	0.676082	0.324358	0.46403	1.0426	0.479762
IPI00210435.2	Pc Pyruvate carboxylase, mitochondrial	1	0	1	0.666667	1.188	0	1.188	0.792	0.794328	0.990832	1.02802	0.937725	0.12557	1.07647	38.3707	0.946237	13.4645	21.5695	14.3587	0.210191	1.60196	0.954993	0.990832	0.92045	0.955425	0.0351932	1.01887	0.416681	0.0368351	0.990832	52.9663	1.44544	18.4675	29.8777	0.208227	19.694	1.61785
IPI00210900.1	Ambp Protein AMBP	1	2	2	1.66667	4.298	8.596	8.596	7.16333	1.01859	0.990832	0.981748	0.997057	0.0191942	1.05682	1.1695	1.31826	1.18152	0.131134	1.18501	0.0661521	0.110987	1.02802	0.92045	0.963829	0.970765	0.0541176	0.97363	0.248079	0.0557473	1	0.990832	1.05682	1.01588	0.0357456	0.239611	1.01888	0.0351867
IPI00210920.1	Got2 Aspartate aminotransferase, mitochondrial	43	37	40	40	58.6	57.67	59.07	58.4467	0.60256	0.369828	0.380189	0.450859	0.131479	0.190546	0.559758	0.636796	0.462366	0.238534	1.02552	0.473058	0.515898	0.440555	0.691831	0.510505	0.54763	0.129687	1.21464	0.207715	0.236814	0.765597	0.322107	0.328095	0.471933	0.254338	0.453313	1.04674	0.538928
IPI00210941.1	Tpm3 Isoform 2 of Tropomyosin alpha-3 chain	28	28	29	28.3333	43.15	52.02	43.15	46.1067	0.758578	1.34276	1.11686	1.07274	0.294583	2.37684	0.704693	1.11686	1.39947	0.871158	1.30458	0.295316	0.622494	1.31826	0.903649	0.118032	0.779979	0.609595	0.727094	0.255113	0.781552	0.77983	1.39316	13.0617	5.07823	6.92069	0.210863	4.73391	1.36282
IPI00210977.2	Coq7 Ubiquinone biosynthesis protein COQ7 homolog	4	3	2	3	18.43	13.36	9.217	13.669	0.903649	0.879022	0.879022	0.887231	0.0142184	0.903649	0.946237	1.01859	0.956159	0.0581097	1.07769	0.0851684	0.060774	0.895365	0.879022	0.787046	0.853811	0.0583949	0.962332	0.213875	0.0683933	0.903649	0.847227	0.685488	0.812122	0.113238	0.184681	0.915344	0.139435
IPI00211053.6	Ckm Creatine kinase M-type	49	41	38	42.6667	70.6	67.19	60.89	66.2267	0.928966	0.310456	0.457088	0.565503	0.323194	0.0912011	0.331131	0.501187	0.30784	0.205983	0.544364	0.159746	0.669124	0.903649	0.847227	0.981748	0.910875	0.0675507	1.61073	0.100743	0.0741603	1.0666	0.383707	0.461318	0.637207	0.373881	0.407105	1.1268	0.58675
IPI00211075.2	Serpina3n Serpina3n-like protein	5	8	6	6.33333	13.95	23.26	20	19.07	1.48594	1.00925	1.57036	1.35518	0.302545	1.64437	1.1272	0.937562	1.23638	0.365835	0.912332	0.343887	0.295893	1.39316	0.981748	1.24738	1.20743	0.208594	0.890971	0.264523	0.172759	0.990832	1.00925	1	1.00003	0.00921056	0.0894707	0.737928	0.0092103
IPI00211110.1	Ppp2r5a Uncharacterized protein	1	1	1	1	2.881	2.881	2.881	2.881	1.04713	1.15878	1.14815	1.11802	0.0616227	0.724436	0.831764	0.937562	0.831254	0.106564	0.743505	0.0120916	0.128197	0.879022	0.963829	1.01859	0.953814	0.0703212	0.853128	0.0195995	0.0737263	1.1695	1	1.0666	1.0787	0.0853951	0.278157	0.964829	0.079165
IPI00211133.4	Cdc37 Hsp90 co-chaperone Cdc37	1	2	1	1.33333	3.958	5.805	3.958	4.57367	0.895365	2.99226	1.09648	1.66137	1.15697	0.928966	2.12814	0.855067	1.30406	0.714632	0.784929	0.338537	0.548006	1.03753	1.94089	1.0666	1.34834	0.513369	0.811582	0.349809	0.380742	0.77983	0.325087	1.2942	0.799704	0.48486	0.164384	0.481353	0.606299
IPI00211216.4	Eif5a Eukaryotic translation initiation factor 5A-1	3	4	3	3.33333	38.96	46.75	30.52	38.7433	0.887156	0.990832	0.981748	0.953245	0.0574149	1.04713	1.1695	1.30617	1.17427	0.129587	1.23186	0.0404197	0.110355	1.02802	1.03753	1.08643	1.05066	0.0313401	1.10219	0.0396485	0.0298291	0.855067	0.855067	0.903649	0.871261	0.0280492	0.0578886	0.913994	0.0321938
IPI00211225.1	Acadl Long-chain specific acyl-CoA dehydrogenase, mitochondrial	39	38	35	37.3333	43.49	42.56	46.74	44.2633	0.744732	0.207014	0.237684	0.396477	0.301988	0.0539511	0.409261	0.534564	0.332592	0.249311	0.838869	0.396004	0.749599	0.461318	0.724436	0.704693	0.630149	0.146545	1.58937	0.158609	0.232556	0.758578	0.366438	0.452898	0.525971	0.20603	0.288414	1.32661	0.391713
IPI00211336.1	Sh3bgrl3 Uncharacterized protein	1	2	2	1.66667	16.13	24.73	24.73	21.8633	1.0666	1.18032	1.1695	1.13881	0.0627688	1.39316	1.59956	1.78649	1.59307	0.196746	1.39889	0.023222	0.123501	1.1695	1.28233	1.34276	1.26487	0.0879435	1.11069	0.0603958	0.069528	1	0.855067	0.912011	0.922359	0.0730187	0.00919998	0.809936	0.0791652
IPI00211448.2	Ehd2 EH domain-containing protein 2	9	11	8	9.33333	20.07	21.55	15.47	19.03	0.981748	0.83946	1.02802	0.949741	0.0982683	0.539511	0.887156	1.03753	0.821398	0.255438	0.864865	0.242418	0.310979	0.895365	0.855067	1.05682	0.93575	0.106767	0.985268	0.43776	0.114097	0.816582	0.758578	0.946237	0.840466	0.0960824	0.12027	0.884942	0.11432
IPI00211593.1	Sod2 Superoxide dismutase [Mn], mitochondrial	10	8	7	8.33333	31.98	24.32	27.03	27.7767	1.05682	0.954993	0.954993	0.988934	0.0587889	0.272898	0.946237	0.937562	0.718899	0.386273	0.726943	0.174642	0.537312	0.648634	0.92045	0.92045	0.829845	0.156933	0.83913	0.107189	0.189111	0.954993	0.963829	0.972747	0.963856	0.00887734	0.269067	0.974641	0.00921023
IPI00211733.1	Psmc1 26S protease regulatory subunit 4	1	1	2	1.33333	1.818	1.818	4.773	2.803	1.02802	1.44544	0.972747	1.14873	0.258436	1.09648	1.77011	0.937562	1.26805	0.441997	1.10387	0.355889	0.348564	1.20226	1.72187	1.04713	1.32375	0.353395	1.15236	0.265026	0.266965	0.903649	0.981748	0.855067	0.913488	0.0639111	0.12614	0.795213	0.0699638
IPI00211756.1	Phb Prohibitin	12	13	11	12	44.12	46.32	39.34	43.26	0.704693	0.619441	0.660694	0.661609	0.0426334	0.369828	0.717794	0.912011	0.666544	0.274701	1.00746	0.489074	0.412126	0.794328	0.903649	0.824138	0.840705	0.0565122	1.2707	0.00695924	0.06722	0.654636	0.862979	0.855067	0.790894	0.118069	0.0949804	1.19541	0.149285
IPI00211812.1	Copb1 Coatomer subunit beta	3	4	2	3	3.778	4.827	2.518	3.70767	0.937562	1.07647	1.03753	1.01719	0.0716512	1.00925	1.08643	0.855067	0.983582	0.117797	0.966965	0.349464	0.119763	0.855067	0.963829	0.946237	0.921711	0.058382	0.906139	0.0755036	0.0633409	0.937562	0.963829	0.847227	0.916206	0.061164	0.0693522	0.900727	0.0667579
IPI00212014.3	Vcp Transitional endoplasmic reticulum ATPase	16	15	15	15.3333	21.22	20.47	22.95	21.5467	0.990832	0.990832	1.41906	1.13357	0.247236	1.04713	0.990832	0.619441	0.885801	0.232385	0.781423	0.137427	0.262345	1.02802	0.963829	0.483059	0.824968	0.297836	0.727759	0.120855	0.361028	0.981748	1.03753	0.895365	0.971547	0.0716285	0.187634	0.857066	0.0737262
IPI00212015.1	Acadm Medium-chain specific acyl-CoA dehydrogenase, mitochondrial	11	12	10	11	26.6	28.98	25.42	27	0.972747	0.60256	0.758578	0.777961	0.185853	0.260615	0.625173	0.704693	0.53016	0.236795	0.681474	0.115442	0.446648	0.711214	0.801678	0.831764	0.781552	0.0627446	1.00462	0.488555	0.0802821	0.613762	0.636796	0.679204	0.643254	0.0331954	0.167765	0.826845	0.0516054
IPI00212052.3	Ndufs4 NADH dehydrogenase [ubiquinone] iron-sulfur protein 4, mitochondrial	5	5	5	5	25.14	31.43	31.43	29.3333	0.60256	0.483059	0.711214	0.598944	0.11412	0.231207	0.501187	0.744732	0.492375	0.256876	0.822072	0.280993	0.521708	0.704693	0.731139	1	0.811944	0.163397	1.35563	0.0731232	0.201242	0.679204	0.457088	0.731139	0.622477	0.145566	0.41848	1.03929	0.233849
IPI00212314.5	Msn Moesin	16	13	16	15	23.05	19.76	20.62	21.1433	1.45881	6.54636	2.67917	3.56145	2.65605	2.18776	5.70164	0.580764	2.82339	2.61894	0.792765	0.374534	0.927588	1.27057	3.34195	0.737904	1.78348	1.37571	0.500773	0.189472	0.771362	1.28233	9.28966	2.88403	4.48534	4.23704	0.383922	1.25942	0.944641
IPI00212523.1	Park7 Protein DJ-1	6	6	4	5.33333	30.16	33.86	22.22	28.7467	1.11686	0.597035	1.00925	0.907717	0.274385	0.369828	0.636796	0.928966	0.645197	0.279664	0.710791	0.155192	0.433455	1.01859	0.937562	1.05682	1.00432	0.0608947	1.10643	0.303607	0.0606326	0.963829	0.642688	0.912011	0.839509	0.17241	0.368577	0.924858	0.20537
IPI00212622.2	Hadha Trifunctional enzyme subunit alpha, mitochondrial	44	41	41	42	47.44	45.35	45.09	45.96	0.711214	0.255859	0.337287	0.434786	0.24283	0.0887156	0.448745	0.519996	0.352486	0.231193	0.81071	0.346323	0.655893	0.704693	0.862979	0.895365	0.821012	0.102028	1.88831	0.0472559	0.124272	0.794328	0.331131	0.444631	0.523364	0.241427	0.33866	1.20373	0.461299
IPI00212651.1	Timm13 Mitochondrial import inner membrane translocase subunit Tim13	3	4	4	3.66667	25.26	33.68	33.68	30.8733	0.972747	0.83946	0.981748	0.931318	0.0796789	0.887156	0.946237	1.04713	0.960174	0.080892	1.03098	0.341277	0.0842473	0.937562	1.02802	1.02802	0.997865	0.0522236	1.07145	0.15132	0.0523354	0.990832	0.937562	1.0666	0.99833	0.064843	0.162058	1.07195	0.0649514
IPI00212666.2	Mug1;LOC297568 Isoform 1 of Murinoglobulin-1	11	14	15	13.3333	7.801	9.684	11.63	9.705	0.946237	0.92045	0.928966	0.931884	0.013139	1.05682	0.972747	0.972747	1.00077	0.0485383	1.07392	0.0624415	0.0485009	0.946237	0.937562	0.928966	0.937588	0.00863537	1.00612	0.28443	0.00921019	1	1.09648	1.10662	1.0677	0.0588496	0.0256296	1.14574	0.055118
IPI00212767.1	Prss1 Anionic trypsin-1	17	8	10	11.6667	20.33	15.85	8.13	14.77	0.698232	0.772681	0.946237	0.805717	0.12726	0.731139	0.83946	0.855067	0.808555	0.067497	1.00352	0.487444	0.0834785	0.619441	0.679204	0.591562	0.630069	0.0447771	0.781998	0.0637733	0.0710671	1.00925	0.862979	0.912011	0.928081	0.0744496	0.120024	1.15187	0.0802189
IPI00212776.1	Rps3 40S ribosomal protein S3	2	2	2	2	9.053	9.053	9.053	9.053	1.08643	1.1272	0.963829	1.05915	0.0850312	1.28233	1.10662	0.794328	1.06109	0.247167	1.00183	0.495347	0.232936	1.22462	1.10662	0.887156	1.0728	0.171254	1.01289	0.4548	0.159633	0.879022	1.1695	0.879022	0.975848	0.167707	0.249675	0.921349	0.171857
IPI00212868.1	Lamb2 Laminin subunit beta-2	2	1	1	1.33333	1.499	0.7773	1.11	1.12877	0.963829	1.15878	0.737904	0.953503	0.210626	1.0666	0.963829	1.08643	1.03895	0.0658082	1.08961	0.280753	0.0633411	0.963829	1.05682	1.49969	1.17344	0.286333	1.23067	0.174569	0.244011	1	1.08643	1.58489	1.22377	0.31571	0.147024	1.28345	0.257981
IPI00212936.1	- Uncharacterized protein	20	15	16	17	26.2	28.16	25.75	26.7033	0.990832	0.654636	0.642688	0.762719	0.197642	0.954993	0.870964	1.02802	0.951324	0.0785904	1.24728	0.117477	0.0826116	1.10662	1.04713	1.09648	1.08341	0.0318274	1.42046	0.0515821	0.0293771	0.954993	0.903649	0.724436	0.861026	0.121044	0.255536	1.12889	0.140581
IPI00212980.1	Brp44 Isoform Long of Brain protein 44	5	2	3	3.33333	18.9	9.449	19.69	16.013	0.937562	0.847227	0.809096	0.864628	0.0659771	0.928966	0.870964	0.879022	0.892984	0.031421	1.0328	0.275886	0.0351865	0.946237	0.862979	0.801678	0.870298	0.0725569	1.00656	0.462549	0.0833702	0.981748	0.824138	0.862979	0.889622	0.0821133	0.351543	1.02891	0.0923014
IPI00213013.1	Stip1 Stress-induced-phosphoprotein 1	2	2	2	2	3.499	3.315	3.315	3.37633	1.07647	1.01859	1.14815	1.08107	0.0649041	1.1272	0.83946	0.207014	0.724557	0.47073	0.670222	0.159667	0.649679	1.24738	1.33045	1.10662	1.22815	0.113147	1.13605	0.0702081	0.0921279	0.990832	1.11686	0.564937	0.890877	0.289221	0.186495	0.82407	0.324647
IPI00213015.1	Dctn2 Dynactin subunit 2	1	2	1	1.33333	3.731	7.711	3.731	5.05767	0.887156	1.20226	1.02802	1.03915	0.157849	0.903649	1.15878	1.1272	1.06321	0.139081	1.02316	0.426383	0.130813	0.862979	1.1272	1.01859	1.00292	0.132805	0.965142	0.388303	0.132418	0.879022	1.0666	0.83946	0.92836	0.12134	0.196537	0.893388	0.130703
IPI00213190.1	Bcat2 Branched-chain-amino-acid aminotransferase, mitochondrial	2	2	2	2	6.361	6.361	3.817	5.513	0.972747	1.0666	0.359749	0.799698	0.383885	0.731139	0.816582	0.937562	0.828428	0.10372	1.03593	0.455275	0.125201	0.724436	0.801678	0.711214	0.745776	0.0488621	0.932572	0.415575	0.0655185	0.879022	0.765597	0.554626	0.733082	0.164625	0.401031	0.916699	0.224565
IPI00213296.1	Hspb2 Heat shock protein beta-2	4	3	3	3.33333	34.62	24.18	24.73	27.8433	1.0666	1.03753	1.10662	1.07025	0.0346926	0.937562	1.1695	1.10662	1.07123	0.119951	1.00091	0.49512	0.111976	1.00925	1.20226	1.07647	1.09599	0.0979762	1.02405	0.351102	0.0893949	0.608135	0.758578	0.744732	0.703815	0.0831499	0.0042326	0.657618	0.118142
IPI00213436.2	Ndufa4 Uncharacterized protein	17	12	10	13	71.95	58.54	56.1	62.1967	0.487529	0.465586	0.405508	0.452874	0.0424619	0.114815	0.440555	0.564937	0.373436	0.232446	0.82459	0.308006	0.622452	0.376704	0.666807	0.666807	0.570106	0.167491	1.25886	0.17451	0.293789	0.787046	0.524808	0.744732	0.685528	0.140787	0.0464805	1.51373	0.20537
IPI00213463.2	Actn4 Alpha-actinin-4	7	10	6	7.66667	7.684	12.18	6.915	8.92633	1.85353	1.67494	1.67494	1.73447	0.103108	1.34276	1.21339	0.937562	1.16457	0.206965	0.671427	0.0123227	0.177718	0.990832	0.928966	0.83946	0.919753	0.0761054	0.530278	0.000299258	0.0827455	1.8197	1.47231	1.27057	1.52086	0.277764	0.157228	0.876844	0.182636
IPI00213547.2	Surf1;Surf4 Uncharacterized protein	2	2	2	2	3.82	3.82	3.82	3.82	1.00925	1.11686	2.1677	1.43127	0.640033	1.04713	1.27057	1.48594	1.26788	0.219416	0.88584	0.354728	0.173057	1.04713	1.14815	1.51356	1.23628	0.245386	0.863763	0.330552	0.198488	1.25892	1.22462	1.22462	1.23605	0.0198083	0.325056	0.863603	0.0160254
IPI00213587.1	Psmc5 26S protease regulatory subunit 8	1	1	1	1	4.68	4.68	4.68	4.68	1.04713	1.15878	1.14815	1.11802	0.0616227	1.02802	1.18032	1.31826	1.17553	0.14518	1.05144	0.288536	0.123501	0.809096	0.887156	0.937562	0.877938	0.0647272	0.785261	0.00484798	0.0737264	0.737904	0.630957	0.672977	0.680613	0.0538808	0.000411684	0.608766	0.0791651
IPI00213611.1	LOC287167 Uncharacterized protein	3	4	4	3.66667	15.49	21.83	12.68	16.6667	1.19124	1.2942	1.14815	1.2112	0.0750382	1.20226	1.00925	0.751623	0.987713	0.226091	0.815485	0.11157	0.228904	1.11686	1.05682	0.895365	1.02302	0.114553	0.844631	0.0431587	0.111976	0.990832	0.912011	0.963829	0.955557	0.0400563	0.006588	0.788936	0.0419194
IPI00213644.3	Ppib Peptidyl-prolyl cis-trans isomerase B	4	6	5	5	17.59	30.09	23.61	23.7633	0.879022	1.28233	1.1695	1.11028	0.208073	2.46604	1.38038	1.02802	1.62481	0.749524	1.46342	0.178418	0.461299	0.990832	1.10662	0.731139	0.942865	0.192283	0.849211	0.182127	0.203935	0.77983	0.772681	0.685488	0.746	0.0525262	0.0428732	0.6719	0.0704105
IPI00213659.3	Decr1 2,4-dienoyl-CoA reductase, mitochondrial	9	7	8	8	27.76	21.79	22.69	24.08	0.660694	0.559758	0.946237	0.722229	0.200453	0.325087	0.731139	0.990832	0.682353	0.335543	0.944787	0.435067	0.491744	0.613762	0.895365	0.912011	0.807046	0.167596	1.11744	0.302425	0.207665	0.711214	0.510505	0.895365	0.705694	0.192489	0.461444	0.977106	0.272766
IPI00213997.2	RGD1563216 Uncharacterized protein	1	1	2	1.33333	7.792	7.792	17.53	11.038	0.981748	0.787046	1.0666	0.94513	0.143327	0.809096	0.57544	1.04713	0.810555	0.235848	0.857612	0.227596	0.290971	0.981748	0.92045	1.13763	1.01327	0.111969	1.0721	0.276846	0.110502	0.912011	0.011272	0.831764	0.585015	0.498494	0.168564	0.618979	0.852104
IPI00214000.4	Myl2 Myosin regulatory light chain 2, ventricular/cardiac muscle isoform	63	52	48	54.3333	89.76	89.76	87.95	89.1567	1.31826	0.242103	0.170608	0.576989	0.642951	0.123595	0.369828	0.440555	0.311326	0.166382	0.53957	0.276288	0.534429	1.51356	0.912011	0.597035	1.00754	0.46567	1.74619	0.202759	0.462187	1.51356	0.570164	0.731139	0.938288	0.504661	0.244415	1.62618	0.537853
IPI00214033.3	Echdc1 Enoyl-CoA hydratase domain-containing protein 1	1	1	1	1	4.013	4.013	4.013	4.013	0.711214	0.787046	0.772681	0.75698	0.0402804	0.580764	0.666807	0.751623	0.666398	0.08543	0.880338	0.100061	0.128197	0.597035	0.654636	0.685488	0.64572	0.0448955	0.853021	0.0168035	0.0695278	1.13763	0.972747	1.03753	1.0493	0.083068	0.0065623	1.38617	0.0791651
IPI00214448.1	Crym Mu-crystallin homolog	1	1	1	1	4.792	4.792	4.792	4.792	1.01859	1.00925	1.0666	1.03148	0.0307677	0.990832	0.946237	1.20226	1.04644	0.136773	1.01451	0.434485	0.130703	1.03753	1.10662	1.21339	1.11918	0.0886003	1.08502	0.111254	0.0791654	0.862979	0.963829	0.801678	0.876162	0.0818754	0.0335201	0.849422	0.0934478
IPI00214477.1	Hspb3 Heat shock protein beta-3	2	1	1	1.33333	16.45	11.18	11.18	12.9367	1.07647	1.15878	1.14815	1.1278	0.0447724	1.02802	1.00925	1.1272	1.05482	0.0633774	0.935293	0.0932697	0.0600834	1.05682	1.04713	1.10662	1.07019	0.0319222	0.94892	0.0756715	0.0298285	0.981748	0.794328	0.847227	0.874435	0.0966266	0.014569	0.775346	0.110502
IPI00214517.3	Mb Myoglobin	62	42	40	48	85.71	81.82	82.47	83.3333	1	0.0903649	0.0990832	0.396483	0.522679	0.887156	0.18197	0.380189	0.483105	0.363683	1.21848	0.413309	0.752804	0.972747	0.383707	0.390841	0.582432	0.338042	1.469	0.318233	0.580397	1	0.432514	0.972747	0.801754	0.320061	0.16399	2.02217	0.399202
IPI00214761.1	Cd151 CD151 antigen	1	1	1	1	3.953	3.953	3.953	3.953	0.870964	0.963829	0.946237	0.92701	0.0493281	1.00925	1.15878	1.30617	1.15807	0.14846	1.24925	0.051308	0.128197	0.963829	1.05682	1.10662	1.04242	0.0724776	1.1245	0.0468626	0.069528	0.946237	0.809096	0.870964	0.875432	0.0686797	0.177963	0.944361	0.0784523
IPI00214787.1	Slc16a1 Monocarboxylate transporter 1	2	1	1	1.33333	5.061	1.822	1.822	2.90167	1.00925	1.1272	1.10662	1.08103	0.0630019	0.963829	1.19124	1.34276	1.16595	0.19073	1.07856	0.264072	0.163584	0.963829	1.1695	1.23595	1.12309	0.141871	1.03891	0.336687	0.126322	0.895365	0.787046	0.83946	0.840624	0.0541689	0.00393735	0.777617	0.0644389
IPI00214905.3	Tpm4 Tropomyosin alpha-4 chain	25	26	30	27	35.89	40.32	44.76	40.3233	0.816582	1.41906	1.67494	1.30353	0.440688	1.36773	1.09648	0.642688	1.03563	0.36633	0.794484	0.232473	0.353727	1	1.05682	0.539511	0.865443	0.283692	0.663924	0.116417	0.327799	0.549541	1.28233	0.390841	0.740904	0.475556	0.103829	0.568384	0.641859
IPI00215107.3	Rpsa 40S ribosomal protein SA	7	5	4	5.33333	22.37	17.29	17.29	18.9833	1.08643	1.03753	1.02802	1.05066	0.0313401	1.59956	1.11686	0.903649	1.20669	0.356544	1.14851	0.263982	0.295473	0.787046	1.02802	0.816582	0.877215	0.13143	0.83492	0.0715916	0.149827	1.10662	1.20226	1.25892	1.18927	0.0769773	0.0366725	1.13193	0.0647265
IPI00215349.5	Wdr1 WD repeat-containing protein 1	1	1	1	1	1.65	1.65	1.65	1.65	0.981748	1.10662	1.25892	1.11577	0.138814	1.0666	1.1272	2.0893	1.4277	0.573763	1.27957	0.223936	0.40188	1.05682	1.10662	1.25892	1.14079	0.105296	1.02243	0.40832	0.092301	0.990832	1.0666	1.55597	1.20446	0.306757	0.340692	1.0795	0.254683
IPI00215465.1	Cryab Alpha-crystallin B chain	15	18	19	17.3333	61.71	61.71	61.71	61.71	0.801678	0.283139	0.474242	0.519686	0.262239	1.20226	0.972747	0.452898	0.87597	0.383943	1.68557	0.131852	0.438306	0.496592	0.648634	0.359749	0.501659	0.144509	0.96531	0.461652	0.288063	0.37325	0.772681	1.28233	0.809421	0.455653	0.203163	1.55752	0.562937
IPI00215564.1	Rab7a Ras-related protein Rab-7a	3	2	2	2.33333	16.43	11.59	11.59	13.2033	0.963829	0.990832	1.11686	1.02384	0.0816827	1.09648	1.01859	1.02802	1.0477	0.0425093	1.0233	0.342	0.0405741	1.07647	1.04713	0.954993	1.0262	0.0633841	1.0023	0.48527	0.0617661	1.00925	1.07647	1.10662	1.06411	0.0498466	0.25712	1.03933	0.0468433
IPI00230787.5	Car2 Carbonic anhydrase 2	4	3	1	2.66667	19.62	14.23	3.462	12.4373	1.15878	1	1	1.05293	0.0916699	1.70608	1.08643	1.24738	1.34663	0.321529	1.27894	0.125262	0.238766	1.27057	1.05682	1.08643	1.13794	0.115815	1.08074	0.188992	0.101776	1.28233	0.937562	0.855067	1.02499	0.226652	0.428676	0.973465	0.221126
IPI00230830.5	Eif2s1 Eukaryotic translation initiation factor 2 subunit 1	1	1	1	1	2.54	2.54	3.81	2.96333	0.824138	0.912011	65.4636	22.3999	37.2943	1.00925	1.15878	61.9441	21.3707	35.1377	0.954053	0.48696	1.6442	1.15878	1.27057	66.6807	23.0367	37.7969	1.02843	0.492212	1.64073	1.7378	1.48594	83.946	29.0566	47.5358	0.429227	1.29717	1.63597
IPI00230832.7	Cox6c Cytochrome c oxidase subunit 6C-2	8	9	9	8.66667	60.53	76.32	60.53	65.7933	0.963829	0.515229	0.356451	0.611836	0.315003	0.197697	0.60256	0.591562	0.463939	0.230638	0.758274	0.27531	0.49713	0.801678	0.981748	0.751623	0.845016	0.121029	1.38112	0.164886	0.143227	0.824138	0.519996	0.47863	0.607588	0.188675	0.492586	0.993057	0.310531
IPI00230835.5	Ywhag 14-3-3 protein gamma	10	8	8	8.66667	21.46	19.03	19.03	19.84	1.21339	0.954993	0.862979	1.01045	0.18167	1.38038	0.855067	0.698232	0.977894	0.357278	0.967778	0.448555	0.365355	1.31826	0.831764	0.855067	1.0017	0.274398	0.991333	0.482882	0.273933	1.05682	1.39316	1.35519	1.26839	0.184206	0.0796458	1.25527	0.145228
IPI00230838.5	Atp5h ATP synthase subunit d, mitochondrial	16	14	11	13.6667	80.12	75.78	71.43	75.7767	0.711214	0.270396	0.331131	0.43758	0.238911	0.120226	0.591562	0.619441	0.443743	0.28052	1.01408	0.489155	0.632168	0.619441	0.772681	1.00925	0.800458	0.196385	1.82928	0.057272	0.245341	0.758578	0.258226	0.420727	0.479177	0.255245	0.423418	1.09506	0.532675
IPI00230901.7	Gpt Alanine aminotransferase 1	2	0	0	0.666667	3.629	0	0	1.20967	0.990832	0.432514	0.862979	0.762108	0.292508	0.847227	0.134276	0.879022	0.620175	0.421101	0.813763	0.329756	0.679003	1.05682	0.167494	0.887156	0.703823	0.472157	0.923521	0.433129	0.670847	1.03753	0.0847227	0.862979	0.661743	0.507278	0.392408	0.868306	0.766579
IPI00230902.5	Gyg1 Glycogenin-1	1	1	2	1.33333	2.102	4.204	5.105	3.80367	1.05682	0.597035	0.751623	0.801825	0.233966	1.34276	1.28233	0.751623	1.12557	0.325257	1.40376	0.120497	0.28897	1.20226	0.954993	0.809096	0.988784	0.19875	1.23317	0.17622	0.201005	1.01859	1.52757	1.02802	1.19139	0.291174	0.0742321	1.48585	0.244399
IPI00230914.5	Rpl5 60S ribosomal protein L5	3	2	0	1.66667	9.428	6.061	0	5.163	1.07647	1.00925	1.10662	1.06411	0.0498466	1.19124	1.04713	0.879022	1.03913	0.156263	0.976522	0.406435	0.150379	1.03753	0.990832	0.809096	0.945819	0.120685	0.888832	0.112901	0.127599	0.990832	1.10662	0.824138	0.973865	0.142005	0.19465	0.915188	0.145816
IPI00230917.7	Rpl18 60S ribosomal protein L18	1	1	1	1	6.915	6.915	4.787	6.20567	0.887156	1.03753	11.1686	4.36444	5.89308	1.19124	1.22462	18.3654	6.92708	9.90587	1.58716	0.361976	1.43002	0.954993	1.04713	1.11686	1.03966	0.0811932	0.238212	0.215766	0.0780958	0.816582	1.23595	1	1.01751	0.21023	0.214496	0.233137	0.206612
IPI00230921.9	S100a10 Protein S100-A10	3	3	3	3	22.11	22.11	22.11	22.11	0.972747	1.11686	1.10662	1.06541	0.0804127	1.57036	1.94089	2.1677	1.89298	0.301538	1.77676	0.0171324	0.159292	1.02802	1.09648	1.14815	1.09088	0.0602642	1.02391	0.3425	0.0552435	0.963829	0.928966	0.990832	0.961209	0.0310159	0.0709154	0.902195	0.0322676
IPI00230937.5	Pebp1 Phosphatidylethanolamine-binding protein 1	8	12	8	9.33333	58.29	59.89	59.36	59.18	1.01859	0.737904	0.954993	0.903829	0.147172	0.744732	0.613762	0.870964	0.743153	0.128608	0.822227	0.114397	0.173057	0.946237	0.981748	0.887156	0.93838	0.0477829	1.03823	0.365199	0.0509206	0.887156	0.591562	0.912011	0.796909	0.17827	0.234731	0.881703	0.223702
IPI00230941.5	Vim Vimentin	27	34	30	30.3333	38.2	49.79	48.28	45.4233	1.72187	6.42688	6.0256	4.72478	2.60833	2.65461	3.56451	1.6293	2.61614	0.968181	0.553706	0.14763	0.37008	0.887156	1.5417	0.717794	1.04888	0.435111	0.221996	0.0655629	0.414833	1.88799	5.39511	3.94457	3.74256	1.76226	0.310659	0.792112	0.470871
IPI00230942.5	Gstm7 Glutathione S-transferase Yb-3	3	3	4	3.33333	14.22	13.76	17.43	15.1367	1.18032	1.30617	1.2942	1.26023	0.0694612	0.92045	1.05682	1.19124	1.05617	0.135397	0.838078	0.0516468	0.128197	1	1.10662	1.15878	1.08847	0.0809308	0.863706	0.0253121	0.074353	1.00925	0.862979	0.92045	0.930894	0.0736944	0.00246959	0.73867	0.0791652
IPI00231028.2	RGD1303003 ES1 protein homolog, mitochondrial	8	7	7	7.33333	31.58	31.58	31.58	31.58	1.08643	0.529663	0.744732	0.78694	0.280771	0.524808	0.353183	0.496592	0.458194	0.09203	0.582248	0.085502	0.200854	0.870964	0.642688	0.586138	0.69993	0.150794	0.889432	0.333971	0.215442	0.963829	0.248886	0.679204	0.630639	0.359937	0.293418	0.801381	0.57075
IPI00231046.8	Psma4 Proteasome subunit alpha type-4	1	1	1	1	3.831	3.831	3.831	3.831	1.15878	1.1272	1.11686	1.13428	0.0218359	1.15878	1.2942	1.45881	1.30393	0.150255	1.14957	0.0937107	0.115233	1.2942	1.39316	1.45881	1.38206	0.0828686	1.21844	0.0143483	0.0599604	1.18032	1.1695	1.24738	1.19907	0.0421907	0.049608	1.05712	0.0351863
IPI00231069.5	LOC100365425;Dbi Acyl-CoA-binding protein	3	4	3	3.33333	20.69	28.74	35.63	28.3533	1.21339	0.787046	0.758578	0.919671	0.254765	0.954993	0.758578	0.636796	0.783455	0.160551	0.851887	0.242342	0.204926	1.0666	0.77983	0.698232	0.84822	0.19347	0.922308	0.35995	0.22809	1.13763	0.928966	0.870964	0.979186	0.140246	0.372836	1.06471	0.143227
IPI00231106.5	Mpst 3-mercaptopyruvate sulfurtransferase	3	4	4	3.66667	11.11	14.81	14.81	13.5767	1.09648	0.672977	0.972747	0.914067	0.217763	0.731139	0.744732	0.928966	0.801613	0.110501	0.876973	0.241997	0.137848	0.765597	0.737904	0.809096	0.770866	0.0358871	0.843336	0.186347	0.0465543	1.02802	1.0666	1.04713	1.04725	0.0192903	0.200269	1.1457	0.01842
IPI00231107.5	Ptms Parathymosin	1	1	1	1	10.78	11.76	11.76	11.4333	0.698232	1.94089	10.0925	4.24388	5.10304	1.44544	1.22462	4.16869	2.27958	1.63974	0.537146	0.290329	0.719315	0.0564937	0.20893	3.28095	1.18213	1.81924	0.278548	0.206315	1.53895	1.08643	5.59758	3.83707	3.50702	2.27361	0.41757	0.826372	0.648303
IPI00231134.5	Gnb2l1 Guanine nucleotide-binding protein subunit beta-2-like 1	2	3	3	2.66667	5.994	9.779	9.464	8.41233	2.01372	0.963829	1.11686	1.36481	0.567165	0.831764	1.04713	1.58489	1.1546	0.387895	0.845978	0.313851	0.335958	2.60615	1.05682	1.21339	1.62545	0.852911	1.19098	0.342682	0.524722	5.39511	1.25892	2.26987	2.97463	2.15627	0.162152	2.17953	0.724888
IPI00231136.5	Nid1 Uncharacterized protein	4	3	2	3	4.334	3.531	2.167	3.344	0.954993	1.00925	1.07647	1.01357	0.0608512	1	1.15878	1.27057	1.14312	0.135965	1.12781	0.118163	0.118942	1.02802	1.03753	1.04713	1.03756	0.00955657	1.02367	0.283321	0.00921064	0.972747	0.937562	0.570164	0.826825	0.222969	0.14073	0.815755	0.26967
IPI00231139.6	Tkt transketolase	2	3	2	2.33333	4.733	5.954	4.122	4.93633	0.981748	1.02802	1.49969	1.16982	0.28661	1.19124	1.1272	2.10863	1.47569	0.549076	1.26147	0.227477	0.372081	1.10662	1.05682	0.313329	0.82559	0.44433	0.705743	0.166177	0.538197	1.1695	1.1272	1.13763	1.14477	0.0220377	0.446883	0.978594	0.0192507
IPI00231192.5	LOC689064;LOC100134871;Hbb Hemoglobin subunit beta-2	47	45	50	47.3333	86.39	70.75	82.99	80.0433	1.1695	1.55597	1.40605	1.37717	0.194845	1.25892	0.60256	0.887156	0.916214	0.329146	0.665287	0.0605644	0.359246	0.787046	0.704693	0.299226	0.596988	0.261136	0.433489	0.00838541	0.437423	1.04713	0.586138	0.77983	0.804366	0.231473	0.0159216	0.584071	0.287771
IPI00231196.5	Tagln Transgelin	3	4	3	3.33333	10.45	19.4	13.93	14.5933	1.35519	3.7325	2.0893	2.39233	1.21728	1.69044	2.12814	1.61436	1.81098	0.27729	0.756994	0.248817	0.153116	0.963829	1.1272	1.07647	1.05583	0.0836163	0.44134	0.0985257	0.0791948	1.1272	3.66438	1.92309	2.23822	1.29761	0.444018	0.935583	0.579751
IPI00231200.5	Por NADPH--cytochrome P450 reductase	1	2	1	1.33333	1.622	2.802	1.18	1.868	0.912011	0.895365	0.972747	0.926708	0.0407309	1.05682	0.879022	0.744732	0.893524	0.156548	0.964192	0.376352	0.175202	0.954993	0.963829	0.972747	0.963856	0.00887734	1.04009	0.126063	0.00921023	1.11686	1.20226	1.05682	1.12531	0.0730904	0.0119839	1.21432	0.0649511
IPI00231202.6	Rps8 40S ribosomal protein S8	3	2	3	2.66667	14.9	9.615	16.83	13.7817	0.77983	0.831764	0.870964	0.827519	0.0457148	1.13763	1.20226	0.972747	1.10421	0.118351	1.33437	0.0209657	0.107181	0.963829	0.981748	0.92045	0.955342	0.0315181	1.15447	0.0102721	0.0329914	0.744732	0.787046	0.928966	0.820248	0.0965006	0.45696	0.991213	0.117648
IPI00231229.9	Gstp1 Glutathione S-transferase P	1	2	2	1.66667	7.619	12.86	12.86	11.113	0.717794	0.954993	0.937562	0.870116	0.132202	0.554626	0.711214	0.794328	0.686722	0.121714	0.789231	0.0761699	0.177238	0.353183	0.685488	0.711214	0.583295	0.199697	0.670364	0.0586443	0.342361	1	1.1272	1.19124	1.10615	0.0973434	0.0364944	1.27126	0.0880023
IPI00231260.5	Prdx6 Peroxiredoxin-6	4	6	7	5.66667	20.09	27.68	37.5	28.4233	0.990832	1.02802	1.05682	1.02522	0.0330816	0.954993	1.00925	1.09648	1.02024	0.0713799	0.995142	0.460006	0.0699637	0.990832	1.05682	1.07647	1.04137	0.0448575	1.01575	0.32215	0.0430754	0.963829	0.92045	0.92045	0.934909	0.0250451	0.0111436	0.911909	0.0267888
IPI00231261.7	Slc25a11 Mitochondrial 2-oxoglutarate/malate carrier protein	9	10	9	9.33333	31.53	31.53	33.76	32.2733	0.660694	0.296483	0.591562	0.516246	0.193434	0.285759	0.534564	0.744732	0.521685	0.229757	1.01054	0.488261	0.440414	0.870964	0.903649	0.963829	0.912814	0.0471061	1.76818	0.0318204	0.0516054	1	0.356451	0.879022	0.745158	0.342021	0.191921	1.44342	0.458992
IPI00231264.7	Pon1 Serum paraoxonase/arylesterase 1	1	1	1	1	4.507	4.507	4.507	4.507	0.831764	0.92045	0.912011	0.888075	0.048949	1.00925	1.15878	1.2942	1.15408	0.14253	1.29953	0.0355212	0.123501	1.08643	1.20226	1.25892	1.18254	0.087925	1.33158	0.00668084	0.0743527	1.01859	0.870964	0.928966	0.939507	0.074376	0.190911	1.05791	0.079165
IPI00231275.7	Lgals1 Galectin-1	5	7	8	6.66667	38.52	41.48	52.59	44.1967	1.27057	15.9956	1.08643	6.11753	8.55514	2.18776	13.8038	1.01859	5.67006	7.06827	0.926856	0.473894	1.24659	1.41906	10.1859	0.963829	4.1896	5.19794	0.684852	0.379394	1.24068	1.44544	9.54993	1.10662	4.034	4.77994	0.36807	0.659416	1.18491
IPI00231293.7	Pfkm 6-phosphofructokinase, muscle type	9	9	9	9	16.54	17.69	16.79	17.0067	0.21677	0.178649	0.501187	0.298869	0.176247	0.376704	0.698232	1.19124	0.755393	0.410266	2.52751	0.0921531	0.543117	1.07647	1.14815	1.31826	1.18096	0.124189	3.95143	0.00155311	0.10516	0.83946	0.461318	0.751623	0.684134	0.197899	0.0331567	2.28908	0.28927
IPI00231298.5	Pafah1b1 Platelet-activating factor acetylhydrolase IB subunit alpha	1	1	2	1.33333	2.683	2.683	4.878	3.41467	0.92045	0.879022	0.870964	0.890145	0.0265519	0.660694	0.758578	0.809096	0.742789	0.0754505	0.834458	0.032107	0.101577	0.862979	0.870964	0.870964	0.868302	0.00461017	0.975461	0.144442	0.00530941	1.52757	1.27057	1.24738	1.34851	0.155502	0.0165803	1.51493	0.115314
IPI00231346.5	Rpl30;LOC100362027;LOC100364549 60S ribosomal protein L30	1	1	1	1	10.43	10.43	10.43	10.43	71.1214	87.9023	5.39511	54.8062	43.6061	64.2688	87.9023	1.70608	51.2924	44.5391	0.935886	0.463458	0.868339	87.0964	87.9023	7.11213	60.7036	46.4133	1.1076	0.440187	0.764589	85.5067	87.9023	11.8032	61.7374	43.2608	0.427286	1.12647	0.700724
IPI00231358.6	Pfn1 Profilin-1	6	6	7	6.33333	40.71	43.57	52.14	45.4733	1.38038	1.41906	1	1.26648	0.231587	1.69044	1.87068	0.954993	1.50537	0.485087	1.18863	0.249936	0.322238	1.34276	1.07647	1	1.13974	0.179931	0.89993	0.249071	0.15787	1.97697	2.26987	1.04713	1.76465	0.638419	0.154309	1.39335	0.361781
IPI00231359.3	Acads Uncharacterized protein	18	14	15	15.6667	42.03	32.37	37.68	37.36	1.02802	0.619441	0.717794	0.788417	0.213246	0.394457	0.660694	0.887156	0.647436	0.246617	0.821184	0.248163	0.380913	0.990832	0.794328	0.954993	0.913384	0.104651	1.1585	0.21562	0.114575	0.711214	0.469894	0.77983	0.653646	0.16279	0.218259	0.829061	0.249049
IPI00231360.9	Rpl27 60S ribosomal protein L27	1	1	1	1	5.882	5.882	5.882	5.882	0.152757	1.03753	1.1272	0.772494	0.538578	1.28233	1.04713	0.92045	1.0833	0.183633	1.40234	0.213763	0.169512	1.24738	1.0666	0.990832	1.1016	0.13181	1.42603	0.200996	0.119652	3.04789	1.43219	1.2942	1.92476	0.975108	0.0838351	2.49162	0.506613
IPI00231368.5	Txn1 Thioredoxin	3	3	2	2.66667	29.52	29.52	10.48	23.1733	1.09648	1.1272	0.870964	1.03155	0.139915	1.07647	1.04713	0.515229	0.879608	0.315902	0.852708	0.253053	0.35914	1.03753	0.954993	0.642688	0.878403	0.208265	0.85154	0.17893	0.237095	0.990832	1.01859	0.340408	0.783277	0.383787	0.191371	0.759323	0.489976
IPI00231379.2	Slc4a1 band 3 anion transport protein	2	1	0	1	1.94	0.7543	0	0.8981	0.879022	1.70608	1.57036	1.38516	0.443546	1.13763	0.235505	0.613762	0.662298	0.453015	0.47814	0.0597708	0.684005	1.01859	0.887156	0.737904	0.881217	0.140438	0.636186	0.0899945	0.159368	1.07647	0.265461	0.972747	0.771558	0.44135	0.0823228	0.557019	0.572025
IPI00231381.8	Mvp Major vault protein	1	2	3	2	1.626	2.439	4.994	3.01967	0.937562	0.92045	0.92045	0.926154	0.00987983	1.14815	0.972747	0.751623	0.957508	0.198704	1.03385	0.405184	0.207522	0.981748	0.879022	0.724436	0.861735	0.129524	0.930445	0.239995	0.150306	0.903649	1.31826	1.15878	1.12689	0.209134	0.119054	1.21675	0.185585
IPI00231411.7	Atp5e ATP synthase subunit epsilon, mitochondrial	4	4	3	3.66667	29.41	43.14	43.14	38.5633	0.946237	0.47863	0.515229	0.646699	0.260053	0.636796	0.711214	0.654636	0.667548	0.038853	1.03224	0.45143	0.0582025	0.855067	1.08643	1.00925	0.983582	0.117797	1.52093	0.070234	0.119763	0.862979	0.928966	0.895365	0.89577	0.0329958	0.118852	1.38514	0.0368351
IPI00231418.5	Lmnb1 Lamin-B1	2	2	1	1.66667	3.748	3.578	1.874	3.06667	0.946237	1.52757	1.02802	1.16727	0.314691	1.04713	0.136773	1.36773	0.850544	0.63859	0.728659	0.249265	0.750803	0.855067	0.946237	0.912011	0.904438	0.0460545	0.77483	0.141916	0.0509206	0.704693	0.248886	0.717794	0.557124	0.267023	0.032105	0.477287	0.479288
IPI00231423.6	C9 Uncharacterized protein	2	2	3	2.33333	3.175	4.586	6.173	4.64467	1.07647	0.912011	1.13763	1.04203	0.116682	1.21339	1.28233	1.05682	1.18418	0.115559	1.13641	0.1041	0.0975859	1.10662	1.11686	0.981748	1.06841	0.0752274	1.02531	0.380624	0.0704105	0.954993	1.00925	1.18032	1.04819	0.117602	0.475891	1.00591	0.112195
IPI00231426.6	Pgk1 Phosphoglycerate kinase 1	21	21	21	21	43.88	46.76	51.32	47.32	1.65959	0.765597	0.963829	1.12967	0.469502	1.31826	1.20226	0.990832	1.17045	0.166015	1.0361	0.448936	0.141838	2.14783	1.1695	0.990832	1.43605	0.622856	1.27121	0.268136	0.433728	2.05116	0.879022	1.00925	1.31315	0.642449	0.355901	1.16241	0.489244
IPI00231434.6	Fkbp1a Peptidyl-prolyl cis-trans isomerase FKBP1A	1	2	2	1.66667	12.04	25	25	20.68	1.0666	0.77983	0.972747	0.939724	0.146207	1.18032	0.981748	0.717794	0.959954	0.232032	1.02153	0.452792	0.241712	1.15878	0.855067	0.809096	0.94098	0.190013	1.00134	0.496612	0.201931	0.928966	1.13763	0.990832	1.01914	0.107172	0.246899	1.08451	0.105159
IPI00231504.3	Cox6a2 cytochrome c oxidase subunit 6A2, mitochondrial precursor	4	3	3	3.33333	54.64	42.27	42.27	46.3933	0.772681	0.030479	0.30479	0.369316	0.375285	0.717794	0.190546	0.444631	0.450991	0.263682	1.22115	0.38741	0.584672	0.731139	0.16293	0.685488	0.526519	0.315704	1.42566	0.304577	0.599606	0.794328	0.131826	0.57544	0.500531	0.337544	0.338046	1.35529	0.674371
IPI00231506.5	Pgam2 Phosphoglycerate mutase 2	15	12	8	11.6667	45.45	40.71	32.41	39.5233	1.36773	0.946237	0.912011	1.07533	0.253806	0.77983	0.83946	0.912011	0.843767	0.0661955	0.784662	0.125642	0.0784524	0.972747	0.912011	0.912011	0.932256	0.0350662	0.866953	0.216134	0.0376143	1.1272	0.887156	0.92045	0.978268	0.130047	0.298608	0.909741	0.132936
IPI00231553.4	Atxn10 Ataxin-10	1	2	3	2	3.579	4.632	5.684	4.63167	0.895365	0.937562	0.92045	0.917792	0.0212237	1	1.1272	1.25892	1.12871	0.129469	1.22981	0.0511616	0.114706	0.946237	1.03753	1.08643	1.0234	0.0711547	1.11506	0.0569587	0.069528	0.946237	0.787046	0.831764	0.855016	0.0821033	0.157626	0.9316	0.0960255
IPI00231615.5	Anxa1 Annexin A1	6	7	7	6.66667	22.25	25.43	26.88	24.8533	1.10662	3.7325	1.07647	1.97186	1.52483	1.35519	3.94457	0.981748	2.09384	1.61362	1.06186	0.46439	0.770654	1.14815	3.31131	1	1.81982	1.29379	0.922894	0.450874	0.710943	1.21339	2.77971	1.09648	1.69653	0.939886	0.402856	0.860367	0.554006
IPI00231631.13	Eno3 Beta-enolase	15	13	18	15.3333	33.18	25.58	31.34	30.0333	0.420727	0.501187	0.149969	0.357294	0.184001	0.331131	0.660694	0.787046	0.592957	0.235384	1.65958	0.123752	0.396967	1.10662	1.45881	0.724436	1.09662	0.367291	3.06925	0.0269611	0.334929	1.35519	0.711214	0.226986	0.764463	0.565983	0.169677	2.13959	0.740367
IPI00231643.5	Sod1 Superoxide dismutase [Cu-Zn]	11	10	8	9.66667	59.09	53.9	48.7	53.8967	1.13763	0.794328	1.03753	0.989828	0.17655	0.591562	0.824138	0.981748	0.799149	0.19629	0.807362	0.139912	0.245623	0.912011	0.887156	1.02802	0.942394	0.0751848	0.952079	0.350173	0.0797806	0.862979	0.564937	0.879022	0.768979	0.176888	0.100311	0.776882	0.230029
IPI00231659.3	Tmed10 Transmembrane emp24 domain-containing protein 10	1	1	1	1	9.589	9.589	9.589	9.589	1.13763	1.25892	0.92045	1.10567	0.171486	1.78649	1.58489	1	1.45713	0.408514	1.31787	0.136471	0.280356	1.52757	1.18032	0.912011	1.20663	0.30862	1.09132	0.32655	0.25577	1.10662	1.2942	0.963829	1.12155	0.165688	0.456861	1.01436	0.147732
IPI00231674.5	Arf3 ADP-ribosylation factor 3	2	2	2	2	10.5	14.36	13.81	12.89	0.954993	1	1.48594	1.14698	0.294409	1.22462	1.22462	2.12814	1.52579	0.521649	1.33027	0.174904	0.341888	1.02802	0.887156	1.59956	1.17158	0.377275	1.02145	0.466786	0.322023	1.07647	1.22462	2.22844	1.50984	0.626716	0.217165	1.31636	0.415088
IPI00231677.5	Ywhah 14-3-3 protein eta	8	8	7	7.66667	21.54	19.11	19.11	19.92	1.0666	0.685488	1.49969	1.08392	0.407375	1.0666	1.18032	0.0816582	0.776192	0.604165	0.716095	0.25517	0.778371	1.11686	2.07014	1.24738	1.47813	0.516834	1.36368	0.180522	0.349654	1.01859	1.55597	1.14815	1.2409	0.280437	0.307614	1.14483	0.225994
IPI00231689.7	Tnni3 Troponin I, cardiac muscle	27	27	27	27	54.5	59.72	53.08	55.7667	0.660694	0.0679204	0.0751623	0.267925	0.340166	0.147231	0.539511	0.465586	0.384109	0.208446	1.43364	0.3228	0.542673	0.972747	0.717794	0.420727	0.703756	0.276278	2.62669	0.0815348	0.392576	1.30617	1.00925	1.15878	1.15807	0.14846	0.0151437	4.32235	0.128197
IPI00231693.5	Rps3a 40S ribosomal protein S3a	4	3	6	4.33333	19.32	16.67	25.76	20.5833	2.01372	1.75388	1.51356	1.76039	0.250145	2.53513	2.42103	1.55597	2.17071	0.53543	1.23308	0.15997	0.246662	2.72898	2.1677	1.30617	2.06762	0.716664	1.17452	0.271641	0.346614	1.95885	1.88799	1.87068	1.90584	0.046713	0.210321	1.08262	0.0245105
IPI00231694.7	Xdh Xanthine dehydrogenase/oxidase	1	1	1	1	0.9016	0.9016	0.9016	0.9016	1.21339	0.170608	1.23595	0.873315	0.608666	1.11686	1.27057	1.0666	1.15134	0.106271	1.31836	0.256622	0.0923014	1.38038	1.41906	1.33045	1.37663	0.0444205	1.57633	0.144065	0.0322676	0.963829	0.346737	1.15878	0.823114	0.423914	0.456487	0.942517	0.515012
IPI00231714.3	Dlat Dihydrolipoyllysine-residue acetyltransferase component of pyruvate dehydrogenase complex, mitochondrial	13	12	14	13	25.32	22.47	26.58	24.79	0.831764	0.177011	0.465586	0.491454	0.328142	0.0744732	0.188799	0.731139	0.33147	0.350812	0.67447	0.297538	1.05835	0.794328	0.448745	0.685488	0.642854	0.176692	1.30807	0.265651	0.274856	0.685488	0.18197	0.37325	0.41357	0.254169	0.381214	0.841523	0.614574
IPI00231737.5	Akr1b1 Aldose reductase	7	5	7	6.33333	25.63	20.25	19.3	21.7267	0.887156	0.928966	0.937562	0.917895	0.0269653	0.224906	0.912011	0.912011	0.682976	0.3967	0.744068	0.206466	0.580841	0.483059	0.928966	0.954993	0.789006	0.265277	0.859582	0.244513	0.336217	1.00925	0.981748	1	0.997	0.0139958	0.0101513	1.08618	0.0140379
IPI00231742.5	Cat Catalase	1	2	2	1.66667	3.605	6.452	5.882	5.313	0.887156	1.01859	1.03753	0.981092	0.0818999	0.981748	1.13763	1.05682	1.05873	0.0779571	1.07914	0.15012	0.0736326	0.972747	1.0666	1.07647	1.0386	0.0572456	1.05862	0.190689	0.0551179	0.83946	0.946237	0.928966	0.904888	0.0573164	0.132395	0.922327	0.0633409
IPI00231765.4	Rtn4 Isoform 1 of Reticulon-4	2	2	1	1.66667	1.806	1.806	1.376	1.66267	1.07647	1.0666	0.912011	1.01836	0.0922309	0.717794	1.33045	0.597035	0.881761	0.393242	0.865866	0.306065	0.445974	1.51356	1.02802	0.717794	1.08646	0.401089	1.06687	0.399538	0.369172	1.34276	1.34276	0.928966	1.20483	0.238907	0.154559	1.18311	0.19829
IPI00231767.5	Tpi1 Triosephosphate isomerase	13	10	16	13	50.6	47.79	57.43	51.94	1.01859	1.1695	0.92045	1.03618	0.125453	1.15878	1.40605	1.07647	1.21376	0.171534	1.17138	0.113799	0.141324	1.64437	2.12814	1.03753	1.60335	0.546462	1.54736	0.104886	0.340826	1.1695	1	1	1.0565	0.0978603	0.418188	1.01961	0.0926269
IPI00231770.5	Prkar1a cAMP-dependent protein kinase type I-alpha regulatory subunit	8	6	5	6.33333	17.85	18.37	15.49	17.2367	0.990832	0.731139	0.895365	0.872445	0.131355	0.981748	0.862979	0.981748	0.942158	0.0685715	1.07991	0.237275	0.0727814	1	1.00925	0.963829	0.991027	0.0240045	1.13592	0.128132	0.0242219	0.981748	1.02802	1.00925	1.00634	0.0232713	0.108409	1.15347	0.0231247
IPI00231783.5	Ldhb L-lactate dehydrogenase B chain	28	25	24	25.6667	53.29	52.4	56.89	54.1933	0.794328	0.187068	0.246604	0.409333	0.334741	0.0731139	0.310456	0.469894	0.284488	0.199661	0.695003	0.307408	0.701825	0.613762	0.57544	0.685488	0.624897	0.0558627	1.52662	0.190394	0.0893952	0.794328	0.255859	0.405508	0.485232	0.277946	0.389043	1.18542	0.572812
IPI00231788.5	Myl3 Myosin light chain 3	67	49	47	54.3333	84.5	84.5	84.5	84.5	1.07647	0.855067	0.855067	0.928866	0.127824	0.187068	0.855067	0.879022	0.640386	0.392767	0.689427	0.165638	0.613329	0.816582	0.928966	0.887156	0.877568	0.0568022	0.944774	0.287006	0.0647268	0.222843	0.92045	0.963829	0.702374	0.415852	0.224578	0.756163	0.592066
IPI00231825.5	Rbp1 Retinol-binding protein 1	1	1	1	1	8.889	8.889	8.889	8.889	1.09648	1	0.519996	0.872158	0.308773	1.28233	1	0.224906	0.835745	0.547514	0.95825	0.463059	0.655121	0.981748	9.2045	0.744732	3.64366	4.81728	4.17775	0.21203	1.3221	0.698232	11.3763	1.77011	4.61487	5.88002	0.192585	5.29132	1.27415
IPI00231901.6	Casq2 Calsequestrin-2	13	13	14	13.3333	23.24	23.24	23.73	23.4033	1.13763	0.280543	0.580764	0.666312	0.434899	0.177011	0.291072	0.630957	0.366347	0.23615	0.549813	0.184484	0.644607	0.928966	0.704693	0.77983	0.804497	0.114153	1.20739	0.320997	0.141894	0.862979	0.496592	0.946237	0.768603	0.239218	0.371995	1.15352	0.311237
IPI00231927.11	Slc25a4 ADP/ATP translocase 1	68	59	58	61.6667	79.53	77.85	74.16	77.18	0.831764	0.310456	0.183654	0.441958	0.343484	0.123595	0.529663	0.608135	0.420464	0.260073	0.951368	0.467792	0.618538	1	1.01859	0.895365	0.971319	0.0664315	2.19776	0.0557222	0.0683931	0.847227	0.570164	0.654636	0.690676	0.142004	0.169854	1.56276	0.205602
IPI00231929.7	Pkm2 Isoform M1 of Pyruvate kinase isozymes M1/M2	21	25	29	25	40.3	45.2	54.8	46.7667	1.04713	0.60256	0.591562	0.747083	0.259905	0.672977	0.698232	0.787046	0.719418	0.059913	0.962969	0.436278	0.0832798	1.8197	0.92045	0.903649	1.2146	0.5241	1.62579	0.131194	0.4315	1.38038	0.879022	0.903649	1.05435	0.28262	0.119225	1.41129	0.268051
IPI00231968.4	Anxa4 Uncharacterized protein	7	7	6	6.66667	24.14	25.08	20.38	23.2	1.15878	1.04713	1.20226	1.13606	0.0800242	1.97697	1.1272	1.1695	1.42456	0.478872	1.25395	0.203324	0.336155	1.43219	0.954993	1.05682	1.148	0.251325	1.01051	0.471774	0.218925	0.787046	0.92045	0.972747	0.893414	0.0957572	0.0147365	0.786417	0.107181
IPI00231971.5	Fabp3 Fatty acid-binding protein, heart	30	25	25	26.6667	89.47	89.47	89.47	89.47	0.666807	0.183654	0.188799	0.34642	0.277475	0.1	0.255859	0.420727	0.258862	0.160384	0.747248	0.333239	0.619575	0.672977	0.816582	0.765597	0.751719	0.0728018	2.16996	0.0595252	0.0968471	0.963829	0.744732	0.887156	0.865239	0.111181	0.0339674	2.49766	0.128497
IPI00231978.5	Atp5i ATP synthase subunit e, mitochondrial	9	6	7	7.33333	67.61	61.97	71.83	67.1367	0.887156	0.672977	0.636796	0.732309	0.135316	0.100925	0.322107	0.544503	0.322512	0.221789	0.440404	0.0322383	0.687693	0.847227	0.691831	0.758578	0.765879	0.077955	1.04584	0.366492	0.101785	0.717794	0.316228	0.60256	0.545527	0.206769	0.135448	0.744941	0.379026
IPI00231997.6	Ndufa5 NADH dehydrogenase [ubiquinone] 1 alpha subcomplex subunit 5	4	2	2	2.66667	31.9	23.28	23.28	26.1533	1.0666	1.03753	0.855067	0.986397	0.11466	0.816582	0.972747	1.05682	0.948716	0.121907	0.961799	0.358249	0.128497	1.00925	0.972747	0.981748	0.987916	0.0190185	1.00154	0.491949	0.0192511	1.01859	0.787046	0.831764	0.879134	0.122826	0.165579	0.891257	0.139713
IPI00287835.7	Hba-a2 Hemoglobin subunit alpha-1/2	52	34	41	42.3333	73.94	70.42	75.35	73.2367	0.990832	0.737904	0.60256	0.777099	0.197081	0.691831	0.139316	0.143219	0.324788	0.317874	0.41795	0.0589696	0.978711	0.277971	0.331131	0.145881	0.251661	0.0953862	0.323847	0.0136253	0.379026	5.19996	1.41906	1.21339	2.6108	2.24463	0.146154	3.35968	0.859749
IPI00324019.1	Serpina1 Alpha-1-antiproteinase	13	11	9	11	30.66	27.25	27.25	28.3867	1.23595	1.03753	0.937562	1.07035	0.151875	1.97697	1	0.928966	1.30198	0.585637	1.21641	0.284152	0.449806	1.41906	0.990832	0.870964	1.09362	0.288141	1.02174	0.454631	0.263475	1.55597	0.990832	0.972747	1.17318	0.331624	0.33047	1.09608	0.282671
IPI00324047.3	Lypla1 Acyl-protein thioesterase 1	1	1	1	1	5.652	5.652	5.652	5.652	1.19124	1.27057	1.25892	1.24025	0.0428374	1.07647	1.15878	1.30617	1.18047	0.116379	0.951803	0.237592	0.0985873	1.08643	1.15878	1.21339	1.15286	0.0636877	0.929544	0.0649562	0.055243	0.972747	0.787046	0.83946	0.866418	0.0957408	0.00538206	0.698585	0.110502
IPI00324302.3	Acat1 Acetyl-CoA acetyltransferase, mitochondrial	20	18	18	18.6667	45.28	43.63	43.16	44.0233	0.831764	0.222843	0.394457	0.483021	0.313972	0.0824138	0.390841	0.539511	0.337588	0.233155	0.69891	0.278662	0.690649	0.613762	0.77983	0.758578	0.71739	0.0903713	1.48521	0.162261	0.125972	0.744732	0.376704	0.49204	0.537825	0.188238	0.405435	1.11346	0.349998
IPI00324633.2	Glud1 Glutamate dehydrogenase 1, mitochondrial	8	8	10	8.66667	17.56	17.03	20.07	18.22	1.40605	1	0.591562	0.999203	0.407244	0.660694	0.946237	0.928966	0.845299	0.160106	0.845973	0.295694	0.189408	1	0.990832	0.57544	0.855424	0.242517	0.856106	0.316482	0.283505	0.928966	0.946237	0.591562	0.822255	0.199973	0.274548	0.822911	0.243201
IPI00324741.3	Pdia3 Protein disulfide-isomerase A3	16	19	13	16	32.87	39.41	28.71	33.6633	1.19124	6.85488	1.20226	3.0828	3.26673	2.55859	8.47227	1.22462	4.08516	3.85745	1.32515	0.374495	0.944261	1.27057	4.7863	1.03753	2.3648	2.10032	0.767096	0.383716	0.888157	1.47231	5.97035	1.13763	2.8601	2.69875	0.465996	0.927761	0.943588
IPI00324893.4	Ywhaz 14-3-3 protein zeta/delta	11	10	10	10.3333	26.53	31.84	39.59	32.6533	0.887156	1.08643	1.39316	1.12225	0.254895	1.05682	1.11686	0.879022	1.01757	0.123683	0.906724	0.284641	0.121548	0.809096	0.870964	0.912011	0.864023	0.0518073	0.769905	0.109026	0.0599605	0.855067	1.21339	1.59956	1.22267	0.372332	0.360959	1.08949	0.304524
IPI00325135.3	Ywhae 14-3-3 protein epsilon	11	13	13	12.3333	32.94	39.22	44.31	38.8233	0.928966	0.679204	0.698232	0.768801	0.139033	0.981748	0.847227	0.636796	0.821924	0.173863	1.0691	0.350771	0.211532	0.963829	0.831764	0.77983	0.858474	0.094863	1.11664	0.207375	0.110502	0.963829	0.981748	0.946237	0.963938	0.0177557	0.066722	1.25382	0.0184199
IPI00325144.4	Ddx39a ATP-dependent RNA helicase DDX39A	1	1	1	1	2.342	2.342	2.342	2.342	1.02802	0.990832	0.903649	0.974166	0.0638364	1.05682	1.08643	0.879022	1.00742	0.112179	1.03414	0.342055	0.111352	1.1272	1.08643	1.05682	1.09015	0.0353373	1.11906	0.0337561	0.0324151	0.928966	1.2942	1.14815	1.12377	0.183832	0.146166	1.15357	0.163584
IPI00325189.4	Nme2 Nucleoside diphosphate kinase B	10	7	9	8.66667	50.66	41.45	55.26	49.1233	2.07014	0.990832	0.972747	1.34457	0.628425	1.90546	1.1695	1.00925	1.3614	0.477931	1.01252	0.486217	0.351057	1.49969	0.990832	0.847227	1.11258	0.342845	0.827461	0.306343	0.308152	1.7378	0.937562	0.954993	1.21012	0.457069	0.390338	0.900002	0.377706
IPI00325281.1	Eef1a2 Elongation factor 1-alpha 2	17	12	14	14.3333	35.21	26.78	30.45	30.8133	1.10662	0.990832	0.847227	0.981561	0.129947	0.469894	0.946237	0.963829	0.79332	0.280233	0.808223	0.18653	0.353241	1.1272	0.981748	0.862979	0.990641	0.132334	1.00925	0.468248	0.133584	0.831764	0.862979	0.879022	0.857922	0.0240318	0.119324	0.874038	0.0280117
IPI00325555.9	Ankrd1 Ankyrin repeat domain-containing protein 1	1	2	2	1.66667	4.702	9.091	9.091	7.628	1.22462	0.816582	1.02802	1.02307	0.204062	1.49969	1.25892	1.49969	1.41943	0.139003	1.38742	0.0286945	0.0979286	1.41906	1.28233	1.24738	1.31626	0.0907261	1.28657	0.0575852	0.0689273	1.09648	0.895365	0.972747	0.988197	0.101443	0.40425	0.965912	0.102654
IPI00326135.1	Aifm1 Apoptosis-inducing factor	5	6	8	6.33333	10.53	13.16	14.97	12.8867	0.928966	0.937562	0.937562	0.934697	0.00496266	0.390841	0.912011	1.05682	0.786557	0.350265	0.84151	0.270031	0.445314	0.679204	1.03753	1.05682	0.924517	0.212666	0.989109	0.470741	0.230029	0.870964	0.954993	1.01859	0.948182	0.074049	0.391266	1.01443	0.0780957
IPI00326140.3	Pzp Alpha-1-macroglobulin	15	15	13	14.3333	8.2	8.067	8.067	8.11133	1.64437	2.05116	1.08643	1.59399	0.484338	2.80543	2.85759	1.08643	2.24982	1.00786	1.41144	0.193688	0.447976	3.34195	2.208	1.05682	2.20226	1.14258	1.3816	0.232302	0.518821	1.69044	1.03753	1.05682	1.2616	0.371516	0.201164	0.791472	0.294481
IPI00326305.3	Atp1a1 Sodium/potassium-transporting ATPase subunit alpha-1	23	20	21	21.3333	20.43	20.72	20.63	20.5933	1.01859	0.83946	0.704693	0.854248	0.157471	0.862979	0.870964	0.47863	0.737524	0.224244	0.863361	0.252981	0.30405	0.92045	0.879022	0.824138	0.874537	0.0483122	1.02375	0.42401	0.0552432	0.937562	0.801678	0.359749	0.699663	0.302113	0.244536	0.81904	0.431798
IPI00326433.11	Hspe1 10 kDa heat shock protein, mitochondrial	5	5	5	5	52.94	52.94	52.94	52.94	0.322107	0.272898	0.258226	0.28441	0.0334603	0.353183	0.685488	0.704693	0.581122	0.197634	2.04325	0.0588475	0.34009	0.564937	0.505825	0.394457	0.488406	0.0865643	1.71726	0.0205838	0.177238	0.457088	0.194089	0.275423	0.308867	0.134652	0.393072	1.08599	0.435954
IPI00326561.3	Ech1 Delta(3,5)-Delta(2,4)-dienoyl-CoA isomerase, mitochondrial	8	6	7	7	25.38	20.49	23.85	23.24	1.20226	0.49204	0.990832	0.895045	0.364672	0.218776	0.711214	1.07647	0.668818	0.430413	0.747245	0.263258	0.643543	0.928966	1.14815	1.35519	1.1441	0.21314	1.27826	0.188774	0.186295	1	0.496592	1.10662	0.867739	0.325814	0.46383	0.969492	0.375474
IPI00327212.4	LOC687780;LOC100360647;Fau 40S ribosomal protein S30 precursor	1	1	1	1	7.519	7.519	7.519	7.519	1.08643	1.20226	1.18032	1.15634	0.0615307	1.38038	1.58489	1.78649	1.58392	0.203054	1.36978	0.0286344	0.128197	1.1695	1.28233	1.35519	1.26901	0.0935593	1.09744	0.083739	0.0737264	0.855067	0.731139	0.77983	0.788679	0.0624358	0.000954329	0.682049	0.0791651
IPI00327424.3	Nppa Natriuretic peptides A	1	1	1	1	5.921	5.921	4.605	5.48233	0.990832	1.09648	1.64437	1.24389	0.350824	1.34276	1.5417	1.11686	1.33378	0.212561	1.07226	0.36373	0.159368	1.61436	1.77011	1.02802	1.47083	0.391314	1.18244	0.248277	0.26605	1.05682	0.903649	1.44544	1.1353	0.279292	0.348732	0.9127	0.246007
IPI00327469.1	Ahsg Alpha-2-HS-glycoprotein	6	4	3	4.33333	21.02	17.05	13.92	17.33	0.990832	1.04713	0.981748	1.00657	0.0354179	1.21339	1.13763	1.1272	1.1594	0.0470417	1.15184	0.0064213	0.040574	1.03753	1.14815	1.01859	1.06809	0.0699801	1.06112	0.134247	0.0655188	0.981748	0.937562	0.972747	0.964019	0.0233503	0.084179	0.957727	0.0242218
IPI00327630.1	Dync1h1 Cytoplasmic dynein 1 heavy chain 1	6	5	2	4.33333	1.4	1.249	0.646	1.09833	0.660694	0.698232	1.07647	0.811797	0.229976	1.39316	0.937562	0.937562	1.08943	0.263038	1.34199	0.120973	0.241446	0.672977	0.887156	1.18032	0.913485	0.254695	1.12526	0.317543	0.278817	1.40605	1.49969	1.34276	1.41617	0.0789478	0.0169847	1.74448	0.0557476
IPI00327834.5	Pdk2 [Pyruvate dehydrogenase [lipoamide]] kinase isozyme 2, mitochondrial	2	2	1	1.66667	5.16	5.16	3.194	4.50467	0.83946	0.946237	1.11686	0.96752	0.139921	0.515229	0.954993	1.00925	0.826491	0.270923	0.854237	0.240863	0.327799	0.816582	0.990832	1.00925	0.938889	0.10632	0.970408	0.396373	0.113241	1.1695	0.954993	0.946237	1.02358	0.126449	0.317039	1.05794	0.123536
IPI00331770.1	Bst2 Bone marrow stromal antigen 2	2	1	1	1.33333	11.05	5.233	5.233	7.172	24.6604	87.9023	25.3513	45.9713	36.3149	24.4343	0.990832	9.46237	11.6292	11.871	0.252966	0.119067	1.02079	5.86138	0.990832	9.46237	5.4382	4.2516	0.118295	0.095709	0.781803	1.11686	0.990832	0.990832	1.03284	0.0727641	0.0826592	0.0224671	0.0704503
IPI00331776.1	C6 Complement component C6	1	1	1	1	1.927	1.927	1.927	1.927	0.0114815	0.011695	0.011695	0.0116238	0.000123235	1.21339	1.39316	1.57036	1.3923	0.178489	119.78	0.00276231	0.128197	1.11686	1.22462	1.2942	1.21189	0.0893486	104.259	0.000921	0.0737266	1.0666	0.912011	0.972747	0.983785	0.0778814	0.0010662	84.6351	0.0791651
IPI00332042.9	Aldh1a1 Retinal dehydrogenase 1	1	1	1	1	1.996	1.996	1.996	1.996	1.02802	1.14815	1.1272	1.10112	0.0641734	1	1.14815	1.28233	1.1435	0.141223	1.03848	0.335315	0.123501	1.13763	1.24738	1.30617	1.23039	0.0855467	1.1174	0.0549088	0.0695279	0.787046	0.672977	0.717794	0.725939	0.057469	0.00086758	0.659272	0.0791651
IPI00337099.2	Acad9 Uncharacterized protein	2	3	4	3	3.68	5.76	7.04	5.49333	0.954993	1.13763	1	1.03087	0.0951509	0.92045	1.13763	1.07647	1.04485	0.111988	1.01356	0.438681	0.107181	0.912011	1.10662	1.0666	1.02841	0.102773	0.997611	0.488584	0.0999334	0.903649	0.862979	0.912011	0.89288	0.0262304	0.0599626	0.866139	0.0293773
IPI00337168.5	Cct4 T-complex protein 1 subunit delta	1	2	1	1.33333	2.968	5.009	2.968	3.64833	0.847227	0.879022	1.0666	0.930949	0.118545	1.10662	1.15878	1.33045	1.19862	0.117113	1.28752	0.024858	0.0977067	0.83946	0.954993	1.04713	0.947194	0.104054	1.01745	0.433614	0.109855	0.744732	0.972747	1.1272	0.948226	0.192408	0.451133	1.01856	0.202914
IPI00337269.2	Mrpl40 39S ribosomal protein L40, mitochondrial	1	1	1	1	7.767	7.767	7.767	7.767	0.903649	1.00925	0.990832	0.967911	0.0564096	0.879022	1.00925	1.1272	1.00516	0.124138	1.03848	0.335315	0.123501	0.912011	1	1.05682	0.98961	0.0729606	1.02242	0.352875	0.0737267	0.862979	0.737904	0.787046	0.795976	0.0630135	0.0124564	0.822365	0.0791651
IPI00339124.3	Atp1b1 Sodium/potassium-transporting ATPase subunit beta-1	1	2	1	1.33333	3.618	7.237	3.618	4.82433	1.05682	0.737904	1.33045	1.04173	0.296563	0.809096	0.946237	0.847227	0.86752	0.0707868	0.832772	0.208708	0.0815967	0.912011	1.18032	1.95885	1.35039	0.543745	1.2963	0.224888	0.402657	0.946237	1.14815	2.77971	1.6247	1.00535	0.211952	1.55963	0.618792
IPI00339148.2	Hspd1 60 kDa heat shock protein, mitochondrial	14	14	19	15.6667	27.92	27.05	38.39	31.12	0.794328	0.549541	0.293765	0.545878	0.250302	0.201372	0.57544	0.505825	0.427546	0.198941	0.783226	0.279028	0.465308	0.679204	0.772681	0.461318	0.637734	0.15977	1.16827	0.312612	0.250528	0.564937	0.544503	0.340408	0.483283	0.124154	0.362237	0.885331	0.256897
IPI00357923.3	Nop56 Uncharacterized protein	1	1	1	1	2.551	2.551	2.551	2.551	0.92045	1.01859	1	0.97968	0.0521307	0.824138	0.946237	1.05682	0.942398	0.116387	0.961944	0.325057	0.123501	0.794328	0.870964	0.92045	0.861914	0.0635459	0.879791	0.03524	0.0737265	1.34276	1.14815	1.22462	1.23851	0.0980468	0.013273	1.2642	0.079165
IPI00357924.1	Idh3B Isocitrate dehydrogenase [NAD] subunit beta, mitochondrial	5	5	5	5	16.36	14.55	14.55	15.1533	0.887156	0.816582	0.954993	0.886244	0.0692096	0.334195	0.794328	1	0.709508	0.34091	0.800579	0.23277	0.480489	0.554626	0.679204	0.887156	0.706995	0.167998	0.797743	0.0987915	0.237623	0.809096	0.625173	0.92045	0.784906	0.149117	0.184171	0.885655	0.189981
IPI00358033.1	Ndufs1 NADH-ubiquinone oxidoreductase 75 kDa subunit, mitochondrial	29	26	25	26.6667	40.85	39.89	41.95	40.8967	0.737904	0.253513	0.42462	0.472012	0.245649	0.100925	0.452898	0.711214	0.421679	0.30634	0.893364	0.41783	0.726476	0.534564	0.586138	0.855067	0.65859	0.172097	1.39528	0.174216	0.261311	0.597035	0.218776	0.328095	0.381302	0.194662	0.321902	0.807823	0.510518
IPI00358059.2	Dnpep Uncharacterized protein	1	4	3	2.66667	2.316	12	8.632	7.64933	0.981748	1	1.07647	1.0194	0.0502516	1.1272	0.235505	0.92045	0.761051	0.466728	0.746564	0.219554	0.613268	1.0666	0.937562	1.01859	1.00758	0.0652175	0.988404	0.408301	0.0647267	1.13763	1.99526	1.39316	1.50868	0.440334	0.0963822	1.47996	0.291867
IPI00358065.1	Mrpl44 Uncharacterized protein	1	1	1	1	5.723	5.723	5.723	5.723	0.0121339	0.0115878	0.0114815	0.0117344	0.000350022	1.05682	1.21339	1.35519	1.20847	0.149246	102.985	0.00257209	0.123501	0.717794	0.787046	0.831764	0.778868	0.0574231	66.3748	0.000930938	0.0737264	1.39316	1.19124	1.27057	1.28499	0.101727	0.00106037	109.506	0.0791652
IPI00358083.1	Ppp1r7 Protein phosphatase 1 regulatory subunit 7	1	1	1	1	3.333	3.333	3.333	3.333	1.02802	1.13763	1.1272	1.09761	0.0604985	1.13763	1.30617	1.45881	1.30087	0.160659	1.18518	0.0741701	0.123501	0.809096	0.887156	0.928966	0.875073	0.0608419	0.79725	0.00544329	0.0695278	0.794328	0.679204	0.724436	0.732656	0.0580008	0.000833512	0.667499	0.0791651
IPI00358163.4	Slc25a13 solute carrier family 25, member 13	7	7	6	6.66667	9.205	9.763	8.089	9.019	0.928966	0.591562	1	0.840176	0.218216	0.847227	0.698232	0.903649	0.81637	0.106128	0.971665	0.43812	0.13	0.946237	0.895365	0.981748	0.941117	0.0434186	1.12014	0.254511	0.0461352	0.887156	0.972747	1.48594	1.11528	0.323838	0.149026	1.32744	0.290365
IPI00358398.5	Usp24 ubiquitin specific protease 24	1	1	1	1	0.461	0.461	0.461	0.461	1.00925	1.11686	1.10662	1.07758	0.059394	1.25892	1.44544	1.6293	1.44455	0.185187	1.34055	0.0319565	0.128197	1.10662	1.22462	1.28233	1.20452	0.0895601	1.1178	0.0603701	0.0743531	1.03753	0.887156	0.954993	0.959892	0.0753057	0.0522371	0.890785	0.0784522
IPI00358405.3	Myom2 myomesin 2	35	29	32	32	23.77	21.45	26.23	23.8167	1.24738	0.972747	0.366438	0.862189	0.450759	0.751623	1.05682	1.14815	0.985532	0.207655	1.14306	0.348848	0.210703	1.07647	1.14815	1.45881	1.22781	0.20324	1.42406	0.148327	0.165531	1.02802	0.496592	0.496592	0.673734	0.306818	0.292866	0.781422	0.455399
IPI00358406.2	Ctnna1 Uncharacterized protein	1	1	3	1.66667	1.211	1.211	4.075	2.16567	0.879022	0.847227	0.824138	0.850129	0.027557	0.954993	0.772681	0.928966	0.885547	0.0986072	1.04166	0.301303	0.111352	0.92045	0.824138	0.928966	0.891185	0.05822	1.04829	0.176958	0.0653288	0.855067	1.04713	1.22462	1.04227	0.184823	0.105746	1.22601	0.177327
IPI00358441.1	Ndufa9 NADH dehydrogenase [ubiquinone] 1 alpha subcomplex subunit 9, mitochondrial	23	24	23	23.3333	43.77	41.64	38.2	41.2033	0.679204	0.346737	0.328095	0.451345	0.197551	0.138038	0.529663	0.483059	0.383587	0.213924	0.849875	0.353827	0.557694	0.591562	0.787046	0.831764	0.73679	0.127744	1.63243	0.0575464	0.173379	0.597035	0.37325	0.401791	0.457359	0.121802	0.483381	1.01332	0.266317
IPI00358498.2	Acot9 Uncharacterized protein	2	2	2	2	6.15	6.15	6.15	6.15	1.11686	1.28233	1.09648	1.16522	0.101929	1.03753	1.23595	1.21339	1.16229	0.108632	0.99748	0.487205	0.0934643	1.03753	1.18032	1.13763	1.11849	0.0732944	0.959894	0.278775	0.0655296	0.963829	0.870964	1.02802	0.95427	0.0789614	0.0253011	0.818958	0.0827454
IPI00358757.5	Hint2 histidine triad nucleotide binding protein 2	2	2	3	2.33333	19.63	19.63	27.61	22.29	0.946237	1.04713	0.928966	0.974111	0.0638225	0.928966	1.07647	0.879022	0.961485	0.102659	0.987038	0.433425	0.106772	1.03753	1.14815	0.895365	1.02702	0.126722	1.05431	0.282529	0.123389	0.928966	0.794328	0.895365	0.872886	0.0700772	0.0693273	0.896085	0.0802822
IPI00358844.3	- Uncharacterized protein	2	2	2	2	11.72	6.207	12.41	10.1123	0.903649	0.21677	1.01859	0.713004	0.433576	1.08643	1.1272	0.787046	1.00022	0.185739	1.40283	0.188198	0.185698	0.928966	0.0801678	0.954993	0.654709	0.497737	0.918241	0.442984	0.760242	0.903649	1.80302	1.18032	1.29566	0.460645	0.0930656	1.81719	0.355528
IPI00359022.1	Trappc3 Trafficking protein particle complex subunit 3	1	1	1	1	4.444	4.444	4.444	4.444	0.912011	1.00925	0.660694	0.860652	0.179866	1.19124	1.36773	1.0666	1.20852	0.151308	1.40419	0.0320963	0.125201	0.0130617	0.0123595	0.114815	0.0467455	0.0589513	0.0543141	0.00500392	1.26111	1	0.855067	0.0990832	0.651383	0.483764	0.270648	0.756848	0.742672
IPI00359103.4	Rpl11 60S ribosomal protein L11	2	1	0	1	11.8	7.865	0	6.555	0.912011	1.14815	1.01859	1.02625	0.118258	1.40605	1.19124	0.744732	1.11401	0.337355	1.08551	0.352387	0.30283	1.1272	0.903649	0.737904	0.922917	0.195361	0.899309	0.242848	0.211677	1.03753	1.31826	1.02802	1.12793	0.164893	0.219535	1.09908	0.146191
IPI00359981.2	Ndufa13 rCG38845-like	6	6	6	6	30.56	30.56	30.56	30.56	0.847227	0.420727	0.672977	0.646977	0.214436	0.140605	0.432514	0.801678	0.458266	0.331288	0.708318	0.23065	0.722918	0.816582	0.887156	1.11686	0.9402	0.157011	1.45322	0.0675377	0.166997	1.22462	0.619441	1.25892	1.03433	0.359711	0.100085	1.59871	0.347773
IPI00360075.2	Lrpprc Leucine-rich PPR motif-containing protein, mitochondrial	7	5	6	6	5.675	4.382	5.747	5.268	0.972747	0.903649	0.895365	0.92392	0.0424876	0.870964	1.01859	0.972747	0.954101	0.0755595	1.03267	0.29358	0.0791945	1.02802	1.08643	1.04713	1.05386	0.0297806	1.14064	0.00779303	0.0282586	0.737904	0.737904	1.01859	0.831467	0.162055	0.214711	0.899933	0.194902
IPI00360340.3	Ehd1 EH domain-containing protein 1	7	5	5	5.66667	12.17	9.738	9.738	10.5487	1.20226	0.855067	1.1695	1.07561	0.191697	1	0.772681	1.19124	0.987974	0.20954	0.918525	0.310775	0.21209	1.14815	1.09648	1.18032	1.14165	0.0422981	1.0614	0.307207	0.0370499	0.972747	0.554626	1.05682	0.861397	0.268977	0.165158	0.800845	0.312256
IPI00361106.5	- Uncharacterized protein (Fragment)	2	1	1	1.33333	1.582	1.013	1.013	1.20267	1.10662	1.2942	1.27057	1.2238	0.102161	1.07647	1.39316	1.57036	1.34666	0.25021	1.1004	0.247698	0.1858	1.00925	1.33045	1.39316	1.24429	0.205947	1.01674	0.443669	0.165514	1.07647	1.03753	1.11686	1.07695	0.0396697	0.058417	0.880008	0.0368352
IPI00361208.4	Trim72 Tripartite motif-containing protein 72	7	9	6	7.33333	18.24	20.96	14.88	18.0267	1.35519	0.237684	0.698232	0.763702	0.561622	0.737904	0.928966	1.01859	0.895154	0.143366	1.17212	0.364236	0.160158	1.34276	0.870964	1.03753	1.08375	0.239273	1.41908	0.2187	0.220782	1.69044	0.937562	1.33045	1.31949	0.376559	0.118669	1.72775	0.285383
IPI00361301.4	Lama2 laminin, alpha 2	6	4	3	4.33333	2.408	1.38	1.252	1.68	1.14815	0.954993	1.03753	1.04689	0.0969205	1.1272	0.981748	1.08643	1.06512	0.0750284	1.01742	0.405073	0.070441	1.19124	1.00925	1.07647	1.09232	0.0920246	1.04339	0.293879	0.0842469	1.5417	0.946237	1.15878	1.21557	0.301767	0.219704	1.16112	0.248251
IPI00361686.5	C1qbp Complement component 1 Q subcomponent-binding protein, mitochondrial	4	4	4	4	13.98	13.98	13.98	13.98	0.937562	1.02802	1.01859	0.994723	0.0497267	0.879022	0.990832	1.10662	0.992159	0.113807	0.997423	0.486963	0.114706	0.903649	0.963829	1.00925	0.95891	0.0529733	0.963997	0.220771	0.0552433	1.08643	0.928966	1	1.00513	0.0788551	0.428869	1.01046	0.0784526
IPI00361819.2	Ociad1 OCIA domain-containing protein 1	1	1	1	1	6.883	6.883	6.883	6.883	0.928966	1.0666	1.04713	1.01423	0.0744796	0.717794	0.855067	0.954993	0.842618	0.119088	0.830795	0.057481	0.141331	0.83946	1	1.05682	0.965426	0.112728	0.95188	0.285172	0.116765	0.77983	0.711214	0.758578	0.749874	0.0351266	0.00657879	0.739352	0.0468433
IPI00362014.6	Tln1 talin-1	6	6	9	7	3.227	3.148	4.604	3.65967	1.08643	2.39883	2.72898	2.07141	0.868848	1.2942	2.96483	1.78649	2.01517	0.858474	0.972849	0.470133	0.426005	1.08643	1.2942	0.744732	1.04178	0.277439	0.502934	0.0839442	0.266311	0.981748	1.19124	2.58226	1.58508	0.86991	0.265454	0.765219	0.54881
IPI00362072.2	Actr2 Actin-related protein 2	4	5	5	4.66667	7.868	10.91	14.21	10.996	1.08643	1.15878	1.04713	1.09744	0.0566336	1.49969	1.25892	1.02802	1.26221	0.235852	1.15013	0.17483	0.186856	1.11686	1.09648	0.946237	1.05319	0.0931854	0.959678	0.264253	0.0884789	0.972747	1.25892	1.00925	1.08031	0.15576	0.435639	0.984386	0.144181
IPI00362105.2	Psmc6;LOC100365869 proteasome (prosome, macropain) 26S subunit, ATPase, 6	1	1	1	1	3.722	3.722	3.722	3.722	0.954993	0.255859	0.92045	0.710434	0.394052	1.57036	1.55597	1.0666	1.39764	0.286784	1.96731	0.0385197	0.205192	1.05682	1.1695	1.01859	1.08164	0.0784554	1.5225	0.120818	0.072534	0.109648	0.118032	0.831764	0.353148	0.414515	0.170129	0.497088	1.17377
IPI00362131.3	Cdh2 Cadherin-2	1	1	1	1	1.214	1.214	1.214	1.214	1.10662	1.08643	1.0666	1.08655	0.0200143	1.10662	1.10662	1.23595	1.14973	0.0746647	1.05815	0.138877	0.064941	1.23595	1.28233	1.34276	1.28701	0.0535628	1.1845	0.00706044	0.0416178	1.20226	1.11686	1.20226	1.1738	0.0493063	0.0380901	1.0803	0.0420058
IPI00362157.5	Arhgef4 Rho guanine nucleotide exchange factor (GEF) 4	1	1	1	1	0.8319	0.8319	0.8319	0.8319	1	1.05682	1.04713	1.03465	0.0303955	1.70608	1.92309	2.1677	1.93229	0.230949	1.86758	0.00994484	0.11952	1.08643	1	1.04713	1.04452	0.0432721	1.00954	0.382225	0.0414278	1.09648	0.972747	1.03753	1.03558	0.0618883	0.491385	1.0009	0.0597617
IPI00362243.7	Ak3 GTP:AMP phosphotransferase, mitochondrial	3	3	3	3	12.78	17.18	17.18	15.7133	1.03753	1.02802	0.679204	0.914916	0.204188	1.02802	0.946237	0.672977	0.88241	0.185926	0.964471	0.424242	0.210703	0.963829	0.972747	0.912011	0.949529	0.0327963	1.03783	0.398999	0.0345395	0.972747	1.1272	1.48594	1.19529	0.263284	0.111469	1.30645	0.220267
IPI00362395.5	Esd S-formylglutathione hydrolase	1	1	1	1	2.482	2.482	2.482	2.482	1.00925	1.20226	1.19124	1.13425	0.108393	0.903649	1.09648	1.23595	1.07869	0.166861	0.951015	0.328918	0.154689	0.928966	1.01859	1.0666	1.00472	0.0698558	0.885797	0.0844816	0.0695277	0.92045	0.809096	0.862979	0.864175	0.0556865	0.0157086	0.761889	0.0644389
IPI00362416.3	Sdpr Serum deprivation-response protein	2	1	1	1.33333	4.796	2.158	2.158	3.03733	0.954993	1.25892	1.10662	1.10685	0.151966	0.972747	1.40605	1.14815	1.17565	0.217955	1.06216	0.339812	0.185391	0.937562	1.20226	1.01859	1.05281	0.135627	0.951175	0.335001	0.128825	0.954993	0.394457	0.0113763	0.453609	0.474581	0.0647632	0.409821	1.04623
IPI00362425.1	Tnnc1 Cardiac troponin C	21	17	19	19	62.11	62.11	49.69	57.97	1.95885	0.175388	0.169044	0.767759	1.03152	0.751623	0.772681	0.77983	0.768045	0.0146639	1.00037	0.499831	0.0190926	2.03236	0.954993	0.831764	1.27304	0.66047	1.65812	0.260408	0.518814	2.80543	1.11686	1.05682	1.65971	0.992685	0.170667	2.16175	0.598109
IPI00362846.3	Hccs Uncharacterized protein	1	1	1	1	3.65	3.65	3.65	3.65	1.0666	1.30617	1.2942	1.22232	0.134995	0.879022	1.1695	1.30617	1.11823	0.21814	0.914842	0.264045	0.195076	0.946237	1.07647	1.1272	1.04997	0.0933452	0.858994	0.0759649	0.088903	0.887156	0.717794	0.772681	0.792544	0.0864104	0.0070842	0.648392	0.109029
IPI00362927.1	Tuba4a Tubulin alpha-4A chain	15	18	19	17.3333	32.37	39.29	42.41	38.0233	1.08643	0.83946	0.679204	0.868363	0.205144	1.10662	0.92045	0.879022	0.968699	0.12123	1.11555	0.257457	0.125147	1.08643	1.18032	0.912011	1.05959	0.136154	1.22021	0.129806	0.128497	1.0666	1.11686	1.21339	1.13228	0.0746014	0.0721909	1.30393	0.0658859
IPI00362949.1	Uqcrfs1 Cytochrome b-c1 complex subunit Rieske, mitochondrial	22	14	15	17	51.09	51.09	43.43	48.5367	0.501187	0.0862978	0.203236	0.263574	0.213925	0.114815	0.30479	0.483059	0.300888	0.184153	1.14157	0.415181	0.612031	0.642688	0.591562	0.731139	0.655129	0.0706156	2.48557	0.0373174	0.107789	0.794328	0.465586	0.855067	0.704994	0.209545	0.0315592	2.67475	0.29723
IPI00363022.4	Actn2 actinin alpha 2	22	21	25	22.6667	25.62	27.63	32.44	28.5633	3.87258	1.00925	1.11686	1.99956	1.62297	3.87258	1.8197	1.1272	2.27316	1.42776	1.13683	0.418686	0.628094	3.87258	1.92309	1.11686	2.30418	1.41683	1.15234	0.409398	0.614896	6.25173	1.64437	1.38038	3.09216	2.73945	0.29557	1.54642	0.885933
IPI00363180.4	Gbe1 1,4-alpha-glucan-branching enzyme	1	1	1	1	1.567	1.567	1.567	1.567	1.05682	1.08643	1.07647	1.07324	0.0150657	0.990832	1.1272	1.27057	1.12953	0.139886	1.05246	0.279255	0.123844	1.1695	1.41906	1.48594	1.35816	0.166775	1.26548	0.0482822	0.122795	0.903649	0.642688	0.691831	0.746056	0.138674	0.0267208	0.695146	0.185876
IPI00363265.3	Hspa9 Stress-70 protein, mitochondrial	28	21	27	25.3333	33.87	27.54	33.58	31.6633	0.92045	0.138038	0.409261	0.48925	0.397291	0.218776	0.717794	0.981748	0.639439	0.387474	1.30698	0.331834	0.605959	0.887156	1	1.47231	1.11982	0.310435	2.28886	0.0501067	0.277218	0.816582	0.356451	0.57544	0.582824	0.230155	0.373016	1.19126	0.394895
IPI00363569.3	Ranbp1 Uncharacterized protein	1	1	1	1	5.419	5.419	5.419	5.419	0.946237	2.01372	1.97697	1.64564	0.605983	1.58489	0.0207014	0.0111686	0.538921	0.905851	0.327483	0.0818866	1.68086	1.33045	0.0207014	0.0111686	0.454108	0.758953	0.275946	0.0520749	1.6713	1.09648	2.42103	2.58226	2.03326	0.815269	0.273803	1.23554	0.400967
IPI00363770.2	Sh3glb1 Uncharacterized protein	1	2	1	1.33333	3.886	7.254	3.886	5.00867	0.293765	0.704693	0.698232	0.565563	0.235407	0.47863	0.928966	0.92045	0.776015	0.257578	1.37211	0.177806	0.331924	0.630957	0.972747	0.963829	0.855845	0.194809	1.51326	0.0888548	0.227622	0.229087	0.731139	0.758578	0.572935	0.298097	0.48744	1.01303	0.520298
IPI00363849.2	Lamc1 laminin, gamma 1	6	5	5	5.33333	4.667	4.107	4.605	4.45967	1.02802	0.895365	0.801678	0.908353	0.113727	1.05682	0.831764	0.847227	0.911936	0.125709	1.00394	0.486282	0.137849	1.08643	0.879022	0.895365	0.953604	0.115317	1.04982	0.326871	0.120927	0.981748	1.04713	0.92045	0.983109	0.0633507	0.19521	1.0823	0.0644391
IPI00364060.1	LOC679748 Uncharacterized protein	2	2	3	2.33333	17.39	17.39	17.39	17.39	0.990832	1.11686	0.963829	1.02384	0.0816827	1.07647	1	0.83946	0.971975	0.120962	0.949341	0.287938	0.12445	1.05682	1.07647	1.03753	1.05694	0.0194688	1.03233	0.279472	0.01842	0.928966	1.40605	1.07647	1.13716	0.244263	0.256403	1.11068	0.214801
IPI00364200.1	Mavs Mitochondrial antiviral-signaling protein	1	1	1	1	2.564	2.564	2.564	2.564	0.862979	0.972747	0.879022	0.904916	0.0592887	0.870964	1.00925	1.09648	0.992232	0.113717	1.09649	0.16149	0.114607	0.887156	1.00925	0.870964	0.922458	0.0756019	1.01938	0.384246	0.081957	1.09648	0.954993	0.879022	0.976831	0.11036	0.195977	1.07947	0.112978
IPI00364201.1	Naa38 Uncharacterized protein	1	1	1	1	16.67	16.67	16.67	16.67	0.981748	1.08643	1.07647	1.04821	0.0577755	0.963829	1.10662	1.24738	1.10595	0.141778	1.05508	0.282954	0.128196	0.946237	1.04713	1.09648	1.02995	0.0765798	0.982575	0.379646	0.0743531	0.92045	0.787046	0.83946	0.848985	0.0672101	0.00919999	0.809936	0.0791652
IPI00364262.4	Gars glycyl-tRNA synthetase	1	3	1	1.66667	1.786	5.357	1.786	2.97633	0.534564	0.787046	1.05682	0.792809	0.261175	0.685488	1.03753	5.91562	2.54621	2.9233	3.21163	0.204019	1.1481	0.801678	1.04713	0.636796	0.828534	0.206481	1.04506	0.43103	0.249212	1.1272	1.36773	13.3045	5.26649	6.9622	0.190778	6.64282	1.32198
IPI00364286.3	Cct7 Uncharacterized protein	1	1	1	1	2.206	2.206	2.206	2.206	0.855067	0.928966	0.831764	0.871932	0.0507487	1.00925	0.847227	0.691831	0.849437	0.158723	0.974201	0.416784	0.186856	0.887156	0.787046	0.57544	0.749881	0.159147	0.860022	0.157253	0.212229	0.887156	0.801678	0.465586	0.71814	0.222855	0.177155	0.823619	0.310322
IPI00364311.1	Gpi Glucose-6-phosphate isomerase	10	11	11	10.6667	20.79	22.04	20.97	21.2667	1.38038	0.887156	0.903649	1.05706	0.280125	0.619441	0.92045	0.946237	0.828709	0.18169	0.783973	0.155862	0.219244	1.31826	0.928966	0.92045	1.05589	0.227256	0.998891	0.497895	0.215226	0.972747	0.981748	0.990832	0.981776	0.00904241	0.3437	0.928777	0.00921026
IPI00364316.3	Rasip1 Uncharacterized protein	1	1	1	1	1.146	1.146	1.146	1.146	0.704693	0.77983	0.765597	0.75004	0.0399112	0.625173	0.717794	0.801678	0.714882	0.0882888	0.953125	0.288711	0.123501	0.737904	0.816582	0.855067	0.803184	0.0597192	1.07086	0.139268	0.0743531	1.51356	1.2942	1.38038	1.39605	0.110518	0.00245623	1.8613	0.079165
IPI00364321.3	Etfb Electron transfer flavoprotein subunit beta	14	11	14	13	51.76	43.92	51.76	49.1467	0.895365	0.416869	0.895365	0.735866	0.276259	0.366438	0.325087	0.895365	0.528963	0.317986	0.718831	0.221853	0.601149	0.731139	0.83946	0.972747	0.847782	0.121019	1.15209	0.285055	0.142748	0.855067	0.343558	0.963829	0.720818	0.331212	0.477399	0.97955	0.459494
IPI00364390.1	Tmem126a Transmembrane protein 126A	1	1	1	1	5.102	5.102	5.102	5.102	0.928966	1.02802	1.00925	0.988745	0.0526131	0.77983	0.879022	0.981748	0.8802	0.100964	0.890219	0.098443	0.114706	0.83946	0.954993	1	0.931484	0.0828116	0.942087	0.18936	0.0889028	0.816582	0.619441	0.666807	0.700943	0.102908	0.0116449	0.708922	0.146814
IPI00364431.2	Sucla2 succinyl-CoA ligase [ADP-forming] subunit beta, mitochondrial	12	11	10	11	23.87	22.37	19.14	21.7933	0.946237	0.452898	0.698232	0.699122	0.246671	0.539511	0.42462	0.636796	0.533642	0.10621	0.763303	0.185702	0.199028	0.809096	0.862979	0.77983	0.817302	0.0421772	1.16904	0.2476	0.0516054	0.862979	0.251189	0.698232	0.604133	0.316564	0.352014	0.864131	0.523997
IPI00364504.5	Copg Coatomer subunit gamma	1	1	1	1	1.602	1.602	1.602	1.602	0.0113763	0.0549541	0.597035	0.221122	0.326279	0.704693	0.0937562	0.496592	0.431681	0.310598	1.95223	0.231846	0.719509	0.717794	0.401791	0.60256	0.574048	0.159919	2.59607	0.0969791	0.278582	0.0113763	0.0801678	0.824138	0.305227	0.450704	0.403794	1.38036	1.47662
IPI00364621.2	Anxa11 Uncharacterized protein	6	6	6	6	13.52	13.92	14.51	13.9833	1	0.972747	0.981748	0.984832	0.0138856	0.981748	0.870964	0.887156	0.913289	0.0598373	0.927356	0.0843333	0.0655184	1.09648	1.08643	1.04713	1.07668	0.0260788	1.09326	0.00601423	0.0242215	0.946237	0.928966	0.981748	0.952317	0.0269109	0.0800206	0.966985	0.0282584
IPI00364715.3	Auh methylglutaconyl-CoA hydratase, mitochondrial	1	1	3	1.66667	7.905	7.905	17	10.9367	0.972747	1.07647	0.724436	0.924549	0.180896	0.887156	1.01859	0.824138	0.909962	0.0992122	0.984222	0.455017	0.109029	0.765597	0.83946	0.809096	0.804718	0.0371258	0.870389	0.185006	0.0461352	0.698232	0.597035	0.928966	0.741411	0.170126	0.135409	0.801916	0.229462
IPI00364761.1	Lactb2 Beta-lactamase-like protein 2	1	1	1	1	4.514	4.514	4.514	4.514	0.862979	0.954993	0.937562	0.918511	0.0488759	0.636796	0.731139	0.816582	0.728172	0.0899301	0.792775	0.0233202	0.123501	0.963829	1.05682	1.11686	1.04584	0.0771057	1.13862	0.0423929	0.0737264	1.2942	1.10662	1.18032	1.19371	0.0945005	0.0103775	1.29962	0.0791651
IPI00364777.1	Letm1 LETM1 and EF-hand domain-containing protein 1, mitochondrial	5	4	3	4	9.066	8.254	7.578	8.29933	1.0666	0.870964	0.855067	0.930875	0.117806	0.731139	0.972747	0.847227	0.850371	0.120835	0.913518	0.227561	0.142096	0.698232	0.847227	0.787046	0.777502	0.0749546	0.835237	0.0712747	0.0964044	0.972747	1.01859	0.92045	0.970596	0.0491061	0.315728	1.04267	0.0505937
IPI00364799.5	Myh7b Uncharacterized protein	27	21	20	22.6667	7.007	5.925	7.676	6.86933	0.879022	0.972747	0.963829	0.938533	0.0517301	0.816582	0.937562	1.05682	0.936987	0.120119	0.998353	0.49254	0.128197	0.772681	0.855067	0.895365	0.841037	0.0625338	0.896119	0.0541879	0.0743531	0.654636	0.559758	0.597035	0.60381	0.0478006	0.000609875	0.643355	0.0791651
IPI00364850.1	Ndufb6 Uncharacterized protein	9	9	5	7.66667	32.03	32.03	25.78	29.9467	0.765597	0.118032	0.895365	0.592998	0.416418	0.660694	0.457088	0.862979	0.660253	0.202946	1.11342	0.409108	0.307375	0.847227	0.981748	1.04713	0.958701	0.101924	1.6167	0.132389	0.106315	0.855067	0.288403	0.972747	0.705406	0.365897	0.371708	1.18956	0.518704
IPI00364868.3	Col15a1 collagen, type XV, alpha 1	1	1	2	1.33333	0.5948	0.5948	1.338	0.842533	7.65597	1.28233	1.09648	3.34492	3.73463	5.7544	1.09648	1.04713	2.63267	2.70361	0.787064	0.401738	1.02695	9.63829	1.39316	1.19124	4.07423	4.81968	1.21803	0.423296	1.18297	5.54626	1.35519	1.0666	2.65601	2.50718	0.402841	0.794043	0.943963
IPI00365149.2	Coq9 Ubiquinone biosynthesis protein COQ9, mitochondrial	9	7	8	8	26.92	26.92	22.12	25.32	0.717794	0.37325	0.691831	0.594292	0.191867	0.248886	0.474242	0.870964	0.531364	0.314948	0.894113	0.392594	0.592717	0.534564	0.711214	0.912011	0.719263	0.188852	1.21029	0.233231	0.262563	0.801678	0.432514	1.0666	0.766929	0.318466	0.237709	1.29049	0.415248
IPI00365170.1	Ndufb7 Uncharacterized protein	6	4	4	4.66667	44.53	44.53	40.15	43.07	0.77983	0.801678	0.847227	0.809579	0.0343862	0.539511	0.887156	1.05682	0.827828	0.263707	1.02254	0.457966	0.318553	0.724436	0.870964	0.972747	0.856049	0.124826	1.0574	0.295088	0.145816	0.794328	0.744732	0.981748	0.840269	0.125008	0.358439	1.03791	0.148772
IPI00365217.1	Cmpk1 UMP-CMP kinase	1	1	1	1	3.524	3.524	3.524	3.524	1.01859	0.855067	0.895365	0.923008	0.0851947	1.24738	1.04713	0.937562	1.07736	0.157107	1.16723	0.114606	0.145826	1.15878	1.0666	0.990832	1.07207	0.0841061	1.16149	0.0486348	0.0784522	0.887156	0.824138	1	0.903765	0.0890996	0.40014	0.979152	0.0985872
IPI00365286.3	Vcl Vinculin	22	25	21	22.6667	23.92	27.86	24.39	25.39	0.946237	0.597035	1.01859	0.853954	0.22542	1.36773	1.01859	1.05682	1.14771	0.191496	1.344	0.0811886	0.16685	0.801678	0.912011	0.954993	0.889561	0.0790844	1.0417	0.408072	0.0889028	0.457088	0.60256	0.990832	0.683493	0.275923	0.227805	0.800386	0.403695
IPI00365334.3	Tmco3 Uncharacterized protein	1	1	1	1	1.032	1.032	1.032	1.032	0.912011	1.13763	0.990832	1.01349	0.114502	0.809096	0.937562	1.04713	0.931262	0.119142	0.918867	0.218711	0.127936	0.847227	1.0666	0.981748	0.96519	0.110618	0.952343	0.313538	0.114607	0.972747	0.831764	0.887156	0.897222	0.0710288	0.111416	0.88528	0.0791652
IPI00365423.1	Ppp2r1a Uncharacterized protein	6	7	3	5.33333	13.41	16.47	6.452	12.1107	1.23595	1.14815	99.0832	33.8224	56.5175	1.20226	1.2942	99.0832	33.8599	56.4851	1.00111	0.499696	1.6682	1.19124	1.23595	99.0832	33.8368	56.505	1.00042	0.499883	1.66993	1.14815	1.11686	99.0832	33.7827	56.5519	0.499678	0.998826	1.67399
IPI00365505.3	Cox7a2l Uncharacterized protein	1	1	2	1.33333	7.965	7.965	18.58	11.5033	0.990832	1.21339	1.05682	1.08701	0.11431	0.794328	1.01859	0.787046	0.866655	0.131631	0.797281	0.047552	0.151884	0.704693	0.660694	0.903649	0.756345	0.129452	0.695802	0.0150784	0.171155	0.809096	0.660694	0.862979	0.777589	0.104758	0.013107	0.715345	0.134722
IPI00365542.4	- Uncharacterized protein	5	4	6	5	3.162	3.162	3.217	3.18033	1.39316	1.05682	1.22462	1.22486	0.16817	2.63027	1.11686	1.05682	1.60132	0.891604	1.30734	0.271318	0.556794	4.65586	1.15878	1.04713	2.28726	2.05203	1.86736	0.232348	0.897159	2.35505	0.855067	1.1272	1.44577	0.799127	0.341084	1.18035	0.552734
IPI00365545.1	Dld Dihydrolipoyl dehydrogenase, mitochondrial	21	16	11	16	30.65	31.43	24.95	29.01	0.981748	0.380189	0.642688	0.668208	0.30159	0.135519	0.586138	0.855067	0.525575	0.363577	0.786543	0.314754	0.69177	0.660694	0.751623	0.816582	0.742966	0.0783041	1.11188	0.356896	0.105394	0.831764	0.57544	0.879022	0.762075	0.163349	0.333533	1.14048	0.214348
IPI00365663.1	Bckdha 2-oxoisovalerate dehydrogenase subunit alpha, mitochondrial	3	2	3	2.66667	8.969	6.726	8.744	8.14633	0.233346	2.35505	1.1695	1.25263	1.06329	1.33045	1.47231	1.20226	1.33501	0.135082	1.06576	0.452972	0.101184	1.57036	1.43219	1.22462	1.40906	0.17403	1.12488	0.411936	0.123509	1.28233	1.01859	1.28233	1.19442	0.15227	0.466735	0.953527	0.127485
IPI00365769.5	Iqgap1 ras GTPase-activating-like protein IQGAP1	2	3	1	2	2.233	3.199	1.086	2.17267	1.22462	0.912011	1.20226	1.11296	0.174389	5.97035	1.28233	6.42688	4.55985	2.84758	4.09704	0.085254	0.62449	0.816582	1.13763	0.981748	0.978652	0.160545	0.879321	0.19115	0.164047	5.19996	1.21339	0.20893	2.20743	2.63983	0.273736	1.98338	1.19588
IPI00365897.2	Ndufb11 Uncharacterized protein	3	3	3	3	33.77	33.77	33.77	33.77	1.03753	0.698232	0.912011	0.88259	0.17155	1.00925	0.92045	1.07647	1.00206	0.0782563	1.13536	0.178922	0.0780958	0.981748	1.11686	1.03753	1.04538	0.0678989	1.18444	0.118452	0.0649514	1.04713	1.18032	1.00925	1.0789	0.0898507	0.0883819	1.22243	0.0832799
IPI00365929.1	Pdia6 protein disulfide-isomerase A6	6	6	4	5.33333	18.2	20.22	13.26	17.2267	0.824138	1.05682	1.07647	0.985807	0.140354	1.61436	1.30617	1.13763	1.35272	0.241751	1.37219	0.0508881	0.178715	0.990832	1.04713	1.05682	1.03159	0.035631	1.04645	0.316652	0.0345397	1.31826	1.30617	1.08643	1.23695	0.130499	0.0430514	1.25476	0.1055
IPI00365981.4	Polr3b DNA-directed RNA polymerase	0	0	0	0	0	0	0	0	3.53183	87.9023	57.544	49.6594	42.7343	0.103753	0.990832	0.990832	0.695139	0.512155	0.0139981	0.0928023	0.736767	0.103753	0.990832	0.990832	0.695139	0.512155	0.0139981	0.0928023	0.736767	0.103753	0.990832	0.990832	0.695139	0.512155	0.0928023	0.0139981	0.736767
IPI00365982.2	Ckap4 Uncharacterized protein	7	8	4	6.33333	15.83	15.48	9.217	13.509	1.36773	2.65461	6.19441	3.40558	2.49944	2.05116	2.37684	3.22107	2.54969	0.603803	0.74868	0.308549	0.236814	0.981748	1.47231	2.39883	1.61763	0.719632	0.474994	0.17047	0.444868	0.990832	2.85759	8.3946	4.08101	3.85052	0.406687	1.19833	0.943522
IPI00365985.5	Hsp90b1 Isoform 1 of Endoplasmin	12	13	11	12	16.92	18.03	14.3	16.4167	1.08643	4.32514	2.22844	2.54667	1.64264	1.45881	2.44343	1.21339	1.70521	0.650987	0.669586	0.238988	0.381763	0.963829	1.33045	0.954993	1.08309	0.214267	0.425298	0.130813	0.197829	1.1695	5.97035	2.75423	3.29803	2.44619	0.342314	1.29504	0.741713
IPI00366079.1	LOC100362805 Uncharacterized protein	1	1	1	1	2.158	2.158	2.158	2.158	1.00925	1.7378	1.70608	1.48438	0.411776	1.94089	0.831764	0.937562	1.23674	0.612101	0.833168	0.298146	0.494932	1.43219	0.895365	0.937562	1.08837	0.2985	0.733217	0.12755	0.274263	0.928966	1.09648	1.1695	1.06498	0.123321	0.106959	0.717459	0.115796
IPI00366104.2	Tollip Toll-interacting protein	1	1	1	1	5.109	5.109	5.109	5.109	1.21339	1.34276	1.01859	1.19158	0.163183	0.879022	1.00925	0.887156	0.925144	0.0729541	0.7764	0.0442844	0.0788571	1.04713	1.15878	0.963829	1.05658	0.0978169	0.886702	0.150015	0.092579	1.03753	0.887156	0.928966	0.951217	0.077616	0.0544406	0.798281	0.0815966
IPI00366110.3	Nap1l4 Uncharacterized protein	2	1	1	1.33333	4.988	2.375	2.375	3.246	0.946237	1.00925	0.954993	0.970161	0.0341366	1.33045	1.1695	1.10662	1.20219	0.115441	1.23917	0.0317014	0.0960253	1.27057	1.19124	1.08643	1.18275	0.0923674	1.21912	0.0221223	0.0780956	1.72187	1.1272	1.05682	1.30196	0.365349	0.12786	1.34201	0.280614
IPI00366206.5	Ndufa12 NADH dehydrogenase (ubiquinone) 1 alpha subcomplex, 12	5	6	8	6.33333	37.93	40.69	48.28	42.3	0.981748	0.912011	0.554626	0.816128	0.229136	0.895365	0.862979	0.847227	0.868524	0.0245431	1.0642	0.365494	0.0282584	0.990832	1.02802	0.963829	0.994226	0.0322278	1.21822	0.154891	0.032415	0.946237	0.711214	0.580764	0.746072	0.185213	0.351223	0.91416	0.248251
IPI00366218.3	Cct2 T-complex protein 1 subunit beta	3	4	3	3.33333	9.159	10.84	9.159	9.71933	0.870964	0.937562	1.03753	0.948685	0.0838374	1.57036	1.15878	1.35519	1.36144	0.205864	1.43509	0.0290192	0.15121	1.15878	1.02802	1.36773	1.18484	0.17135	1.24893	0.0621451	0.144618	1.02802	0.990832	1.05682	1.02522	0.0330816	0.125309	1.08068	0.0322678
IPI00366293.3	Tst Thiosulfate sulfurtransferase	1	1	1	1	4.04	4.04	4.04	4.04	0.954993	0.855067	0.990832	0.93363	0.0703584	0.954993	0.847227	1.1695	0.990573	0.164056	1.06099	0.31142	0.165617	0.946237	0.912011	1.10662	0.988291	0.103899	1.05855	0.248958	0.10513	0.928966	0.787046	0.772681	0.829564	0.0863839	0.0919505	0.888536	0.104132
IPI00366416.2	Cyc1 Uncharacterized protein	22	20	16	19.3333	37.42	37.42	33.74	36.1933	0.529663	0.177011	0.440555	0.38241	0.183376	0.0946237	0.387258	0.559758	0.347213	0.235138	0.907961	0.424275	0.677217	0.564937	0.570164	0.679204	0.604768	0.0645158	1.58147	0.0802505	0.106679	1.07647	0.519996	0.787046	0.794502	0.278309	0.0547938	2.07762	0.350294
IPI00366496.4	Slc44a2 Choline transporter-like protein 2	1	1	1	1	1.135	1.135	1.135	1.135	1.02802	1	0.879022	0.969013	0.0791828	0.928966	0.855067	0.794328	0.859454	0.0674262	0.886937	0.0719648	0.0784524	1.03753	0.990832	0.928966	0.985775	0.0544572	1.0173	0.38972	0.055243	1.67494	1.14815	1.00925	1.27745	0.351175	0.132508	1.3183	0.274903
IPI00367152.1	Ndufv2 NADH dehydrogenase [ubiquinone] flavoprotein 2, mitochondrial	11	11	7	9.66667	40.73	41.53	25.81	36.0233	0.539511	0.145881	0.461318	0.382237	0.20839	0.0685488	0.343558	0.591562	0.334556	0.261623	0.875259	0.408854	0.781999	0.524808	0.903649	0.744732	0.724396	0.190238	1.89515	0.0520937	0.262616	1.28233	0.724436	1.48594	1.16423	0.394247	0.0275556	3.04585	0.338632
IPI00368053.2	Glod4 Glyoxalase domain-containing protein 4	1	1	1	1	2.685	2.685	2.685	2.685	1.01859	0.855067	0.711214	0.861624	0.153794	0.981748	0.928966	0.724436	0.878383	0.135909	1.01945	0.44723	0.154727	1	0.0121339	0.0831764	0.365103	0.550983	0.423739	0.127657	1.50911	1.04713	1.28233	0.122462	0.817307	0.613138	0.45667	0.948566	0.750192
IPI00368134.2	Srp68 Uncharacterized protein	1	1	1	1	2.08	2.08	2.08	2.08	1.11686	1.24738	1.22462	1.19629	0.0697191	1.01859	1.1695	1.31826	1.16878	0.149834	0.977008	0.396484	0.128197	1.19124	1.31826	1.38038	1.29663	0.0964082	1.08388	0.112286	0.074353	1.02802	0.879022	0.937562	0.9482	0.0750643	0.0069578	0.792619	0.079165
IPI00368347.2	Uba1 Ubiquitin-like modifier-activating enzyme 1	7	10	9	8.66667	9.357	11.91	9.735	10.334	0.954993	0.870964	1.02802	0.951324	0.0785904	1.02802	1.21339	1.08643	1.10928	0.0947756	1.16603	0.0463586	0.0854391	0.963829	1.08643	0.912011	0.987422	0.0895692	1.03794	0.313985	0.0907101	0.887156	1.27057	1.21339	1.12371	0.206844	0.141966	1.1812	0.184073
IPI00369006.3	Fam82b Regulator of microtubule dynamics protein 1	2	2	1	1.66667	7.419	5.806	4.194	5.80633	1.0666	1.22462	1.19124	1.16082	0.0832874	0.954993	1.11686	1.21339	1.09508	0.130568	0.943371	0.254864	0.119231	0.954993	1.10662	1.14815	1.06992	0.101676	0.921698	0.149739	0.0950312	0.972747	0.862979	0.903649	0.913125	0.0554944	0.00857813	0.786622	0.0607742
IPI00369093.1	Uqcrh Cytochrome b-c1 complex subunit 6, mitochondrial	7	3	3	4.33333	58.43	41.57	37.08	45.6933	1.24738	1.08643	0.912011	1.08194	0.167731	0.452898	0.937562	0.77983	0.72343	0.247206	0.668641	0.0578312	0.341713	0.83946	1.13763	1.13763	1.03824	0.172147	0.959608	0.384284	0.165807	1.47231	1.04713	1.09648	1.20531	0.232546	0.250692	1.11402	0.192936
IPI00369195.3	Ppa2 Uncharacterized protein	1	1	1	1	3.939	3.939	3.939	3.939	0.972747	0.972747	0.990832	0.978775	0.0104412	0.794328	0.855067	0.972747	0.874047	0.0907113	0.893001	0.0910221	0.103783	0.855067	0.879022	0.937562	0.89055	0.0424386	0.909862	0.0308975	0.0476544	1.03753	0.903649	0.954993	0.96539	0.0675422	0.382718	0.986324	0.0699637
IPI00369217.1	Trap1 Heat shock protein 75 kDa, mitochondrial	3	3	3	3	5.382	5.099	5.524	5.335	1.01859	0.928966	0.937562	0.961706	0.0494506	0.903649	1.00925	0.981748	0.964883	0.0547845	1.0033	0.47209	0.0567783	1.01859	1.01859	0.981748	1.00631	0.0212714	1.04638	0.127845	0.021138	1.03753	0.879022	0.937562	0.951371	0.08015	0.430125	0.989253	0.0842468
IPI00369350.3	Skp1 S-phase kinase-associated protein 1	1	1	1	1	7.362	7.362	7.362	7.362	1.07647	0.801678	0.92045	0.932864	0.137813	1.14815	1.09648	0.691831	0.978821	0.24988	1.04926	0.398899	0.255287	1.0666	1.04713	0.591562	0.901762	0.268818	0.96666	0.434943	0.298103	1.04713	1.57036	1.40605	1.34118	0.267581	0.0502934	1.4377	0.199511
IPI00369419.4	- Uncharacterized protein (Fragment)	2	1	2	1.66667	12.12	8.485	12.73	11.1117	0.972747	1.07647	1	1.0164	0.0537696	1.11686	1.28233	0.937562	1.11225	0.172431	1.0943	0.220629	0.155028	0.954993	1.04713	0.831764	0.944628	0.108056	0.929383	0.190163	0.11439	1.24738	1.0666	1.05682	1.1236	0.107312	0.110652	1.10546	0.0955069
IPI00369573.3	Tmprss13 Uncharacterized protein	2	2	1	1.66667	1.484	1.484	1.484	1.484	0.794328	0.847227	0.83946	0.827005	0.0285644	0.619441	0.660694	0.744732	0.674956	0.0638515	0.816144	0.0187914	0.094601	0.691831	0.717794	0.751623	0.720416	0.0299821	0.871114	0.00561763	0.0416177	0.946237	0.737904	0.787046	0.823729	0.108903	0.481944	0.996039	0.132207
IPI00369582.5	Dhrs7c Uncharacterized protein	1	1	2	1.33333	6.109	6.109	8.039	6.75233	0.136773	0.172187	0.226986	0.178649	0.0454526	0.125893	1.24738	2.63027	1.33451	1.25446	7.47005	0.125734	0.940012	2.91072	4.09261	6.36796	4.45709	1.7572	24.9489	0.0259007	0.394249	1.47231	0.251189	0.597035	0.773512	0.629399	0.121424	4.32979	0.813691
IPI00370003.1	Mrpl45 Uncharacterized protein	1	1	1	1	3.268	3.268	3.268	3.268	0.954993	1.04713	1.04713	1.01642	0.053195	0.787046	0.887156	1.03753	0.90391	0.126079	0.88931	0.129711	0.139482	0.92045	1.04713	1.03753	1.0017	0.0705304	0.985523	0.394161	0.0704105	1.04713	0.77983	1.01859	0.948517	0.146782	0.257726	0.933197	0.154749
IPI00370372.2	Ndufb8 Uncharacterized protein	6	4	5	5	25.81	17.2	17.2	20.07	1.22462	1.39316	1.02802	1.21526	0.18275	0.619441	0.801678	0.972747	0.797955	0.176682	0.656611	0.0233821	0.221419	1.10662	0.963829	1	1.02348	0.0742377	0.842192	0.101473	0.0725343	0.903649	0.496592	0.83946	0.746567	0.218851	0.0241314	0.614326	0.293143
IPI00370411.2	Fbln1 Uncharacterized protein	1	1	2	1.33333	2.128	1.277	2.979	2.128	1.03753	0.237684	2.26987	1.18169	1.02373	1.15878	3.43558	3.53183	2.70873	1.34316	2.29225	0.0986514	0.495864	1.36773	0.394457	3.31131	1.69117	1.48508	1.43114	0.326672	0.878141	1.09648	0.144544	6.36796	2.53633	3.35225	0.281288	2.14635	1.3217
IPI00370415.2	Unc45b Uncharacterized protein	1	2	2	1.66667	1.931	3.541	3.541	3.00433	0.981748	1.04713	0.972747	1.00054	0.0405963	0.972747	0.981748	0.862979	0.939158	0.0661266	0.93865	0.127968	0.0704105	0.972747	0.409261	0.824138	0.735382	0.29204	0.734984	0.127554	0.397127	0.870964	0.448745	0.758578	0.692762	0.218668	0.0653151	0.692387	0.315647
IPI00370456.1	Psmd2 26S proteasome non-ATPase regulatory subunit 2	2	2	2	2	2.753	2.753	2.753	2.753	0.416869	0.937562	0.912011	0.755481	0.293524	0.704693	0.92045	1	0.875048	0.152799	1.15827	0.287836	0.174618	0.0831764	0.731139	0.0161436	0.27682	0.394877	0.366415	0.0865853	1.42648	0.0115878	0.946237	0.387258	0.448361	0.470311	0.200631	0.593478	1.04896
IPI00370681.1	Capza2 F-actin-capping protein subunit alpha-2	2	2	2	2	10.49	10.49	10.49	10.49	1.10662	1.22462	1.07647	1.1359	0.0782948	1.02802	1.18032	1.01859	1.07564	0.0907765	0.94695	0.217031	0.0843928	1.38038	1.51356	0.903649	1.26586	0.320677	1.11441	0.279524	0.253327	0.83946	0.717794	0.895365	0.81754	0.0907921	0.00527713	0.719728	0.111055
IPI00370745.1	Mtx2 Uncharacterized protein	4	2	3	3	7.985	7.985	10.65	8.87333	1.03753	0.698232	0.591562	0.775774	0.232876	0.990832	0.666807	0.258226	0.638622	0.367115	0.823206	0.309379	0.574856	0.946237	0.831764	0.887156	0.888386	0.0572466	1.14516	0.246691	0.0644389	1.09648	1.0666	1.43219	1.19842	0.202999	0.0390309	1.54481	0.169389
IPI00370752.3	Nit2 Omega-amidase NIT2	1	2	2	1.66667	3.623	9.058	9.058	7.24633	4.74242	1.04713	1.49969	2.42974	2.01558	0.685488	1	0.0114815	0.565657	0.505037	0.232805	0.123397	0.892832	6.79204	0.954993	2.03236	3.2598	3.10608	1.34162	0.360338	0.952845	3.80189	1.21339	1	2.00509	1.55973	0.394041	0.825228	0.777882
IPI00370815.4	Cct8 Uncharacterized protein	2	4	2	2.66667	4.015	8.759	4.015	5.59633	0.981748	1.20226	1.09648	1.0935	0.110288	1.21339	1.27057	1.38038	1.28812	0.0848682	1.17798	0.0383874	0.0658855	1.07647	1.1272	1.03753	1.0804	0.0449641	0.98802	0.431285	0.0416181	1.01859	0.990832	1.01859	1.00934	0.0160267	0.158253	0.923037	0.0158784
IPI00370878.4	Scand3 Uncharacterized protein	1	1	1	1	1.321	1.321	1.321	1.321	1.13763	1.24738	1.23595	1.20699	0.0603379	0.928966	1.1695	1.30617	1.13488	0.190971	0.940259	0.293563	0.168274	0.928966	1.03753	1.08643	1.01764	0.0805917	0.843125	0.0174065	0.0791947	0.870964	0.731139	0.77983	0.793978	0.0709777	0.000857242	0.657819	0.0893951
IPI00371079.3	Ccdc51 Coiled-coil domain-containing protein 51	1	1	2	1.33333	2.683	2.683	4.146	3.17067	0.963829	0.954993	1.13763	1.01882	0.102988	0.946237	1.05682	1.21339	1.07215	0.134234	1.05235	0.307969	0.125201	0.870964	0.887156	1.1272	0.961773	0.143491	0.94401	0.304302	0.149195	0.972747	0.801678	1.11686	0.963763	0.157784	0.321731	0.945963	0.163717
IPI00371132.3	Glb1 Beta-galactosidase	1	2	1	1.33333	0.9274	3.246	0.9274	1.70027	1.09648	1.39316	0.92045	1.13669	0.238906	1.40605	1.52757	2.22844	1.72068	0.443904	1.51376	0.0681969	0.257981	1.10662	1.38038	1.22462	1.23721	0.137314	1.08843	0.284947	0.110987	1.61436	1.38038	0.83946	1.27807	0.397453	0.315576	1.12437	0.310979
IPI00371236.3	Tufm Elongation factor Tu, mitochondrial	6	5	7	6	11.95	9.292	17.48	12.9073	1.09648	0.972747	0.92045	0.996558	0.0903976	0.879022	1.02802	1	0.969013	0.0791828	0.972359	0.355982	0.0817149	0.870964	1.05682	1	0.975927	0.095237	0.979298	0.39951	0.0975862	1.05682	1.00925	1.0666	1.04422	0.0306764	0.231667	1.04783	0.0293773
IPI00371269.3	Rab5b Uncharacterized protein	1	1	1	1	4.651	5.581	5.581	5.271	0.711214	0.0110662	0.0110662	0.244449	0.40423	1.30617	0.0110662	0.0110662	0.442768	0.747729	1.81129	0.35629	1.68876	0.751623	1.02802	1.08643	0.955355	0.178838	3.9082	0.0378415	0.187195	0.0143219	1.13763	1.21339	0.788446	0.67148	0.154406	3.22541	0.851651
IPI00371399.4	Sirt3 SIRT3L mitochondrial	1	2	1	1.33333	3.438	7.813	3.438	4.89633	1.05682	14.8594	1.14815	5.68811	7.94267	0.963829	13.0617	1.23595	5.08716	6.9075	0.89435	0.463037	1.35783	1	13.1826	1.15878	5.11378	6.98823	0.89903	0.464839	1.36655	1.01859	1.23595	0.928966	1.06117	0.157857	0.209604	0.186559	0.148758
IPI00371518.1	Sdhc Uncharacterized protein	2	2	1	1.66667	12.43	11.83	4.734	9.66467	0.972747	1.01859	0.981748	0.991029	0.0242902	0.972747	0.744732	0.195884	0.637788	0.39932	0.643561	0.132457	0.626102	0.990832	1.19124	1.48594	1.22267	0.249044	1.23374	0.123873	0.203688	1	0.409261	0.570164	0.659808	0.305402	0.10021	0.665781	0.462864
IPI00372040.4	Arpc4 actin-related protein 2/3 complex subunit 4	3	3	2	2.66667	22.62	22.62	11.31	18.85	1.48594	1.31826	1.09648	1.30022	0.195354	1.55597	1.35519	0.946237	1.2858	0.310731	0.988905	0.474784	0.241664	1.36773	1.23595	1	1.20123	0.186307	0.923861	0.279948	0.155098	2.12814	1.45881	1.08643	1.55779	0.527863	0.247682	1.1981	0.338853
IPI00372179.1	Ndufb5 Uncharacterized protein	5	4	4	4.33333	28.04	23.81	23.81	25.22	1.05682	0.972747	0.870964	0.966843	0.0930678	0.139316	0.824138	0.816582	0.593345	0.393219	0.613694	0.119041	0.662716	0.580764	0.895365	0.847227	0.774452	0.169457	0.801011	0.0900587	0.218808	1.41906	0.946237	0.963829	1.10971	0.268049	0.229731	1.14776	0.241549
IPI00372191.2	Mccc1 Methylcrotonoyl-CoA carboxylase subunit alpha, mitochondrial	5	4	5	4.66667	6.014	7.972	9.51	7.832	0.972747	0.879022	0.928966	0.926912	0.0468961	0.912011	0.855067	0.990832	0.919303	0.0681758	0.991791	0.441055	0.0741603	0.954993	0.912011	0.937562	0.934855	0.0216184	1.00857	0.404118	0.0231248	0.954993	0.912011	1.09648	0.987827	0.0965174	0.200189	1.06572	0.0977068
IPI00372358.2	Ublcp1 Ubiquitin-like domain-containing CTD phosphatase 1	1	1	1	1	3.145	3.145	3.145	3.145	1.11686	1.23595	1.22462	1.19248	0.0657268	0.887156	1.01859	1.14815	1.01797	0.1305	0.853659	0.0659273	0.128197	1.04713	1.15878	1.21339	1.13977	0.0847448	0.955798	0.222668	0.0743529	1.11686	0.954993	1.01859	1.03015	0.0815518	0.0288068	0.863874	0.0791651
IPI00372388.1	Cct3 T-complex protein 1 subunit gamma	2	2	3	2.33333	3.486	3.486	5.505	4.159	1.03753	0.510505	0.380189	0.642741	0.348049	1.5417	1.80302	0.299226	1.21465	0.803473	1.88979	0.173797	0.661486	1.25892	1.8197	1.1272	1.40194	0.367737	2.18119	0.0302073	0.262305	0.285759	0.524808	0.0990832	0.303217	0.213398	0.118506	0.471756	0.703782
IPI00372499.1	Tmem109 Transmembrane protein 109	1	1	1	1	4.938	4.938	4.938	4.938	1.02802	1.02802	1.0666	1.04088	0.0222742	1	0.937562	0.772681	0.903414	0.117444	0.867936	0.088008	0.13	0.963829	1.00925	0.912011	0.961698	0.0486561	0.923931	0.044427	0.050594	1.13763	1.21339	1.14815	1.16639	0.0410413	0.00879047	1.12058	0.0351866
IPI00372557.3	Vars Valyl-tRNA synthetase	1	2	2	1.66667	1.266	1.978	1.978	1.74067	0.887156	0.990832	0.990832	0.956273	0.0598573	0.895365	10	10.5682	7.15451	5.42802	7.48166	0.0932704	0.758685	1.08643	0.990832	0.990832	1.0227	0.0551912	1.06946	0.11548	0.0539664	1.07647	12.942	13.3045	9.10766	6.95758	0.0897863	9.52411	0.763926
IPI00372792.1	Serping1 Plasma protease C1 inhibitor	1	1	1	1	2.579	2.579	2.579	2.579	1	1.10662	1.09648	1.0677	0.0588496	1.02802	1.18032	1.31826	1.17553	0.14518	1.10099	0.164625	0.123501	0.887156	0.972747	1.01859	0.959498	0.0667117	0.898658	0.0519733	0.0695277	0.937562	0.801678	0.855067	0.864769	0.0684595	0.00919996	0.809936	0.0791651
IPI00372839.3	Col6a2 collagen, type VI, alpha 2	3	3	1	2.33333	2.629	2.629	0.779	2.01233	0.990832	0.83946	0.990832	0.940375	0.0873946	1.24738	1.31826	0.990832	1.18549	0.172264	1.26066	0.0582193	0.14531	0.809096	0.698232	74.4732	25.3268	42.562	26.9327	0.212793	1.68051	1.87068	1.97697	73.7904	25.8794	41.4922	0.203585	27.5203	1.60329
IPI00372854.5	Hnrnph3 Uncharacterized protein	1	1	1	1	4.913	4.913	4.913	4.913	0.831764	0.831764	0.809096	0.824208	0.0130872	0.831764	0.963829	1.02802	0.941203	0.100063	1.14195	0.0890916	0.106314	0.77983	0.887156	0.847227	0.838071	0.0542456	1.01682	0.352501	0.0647268	1.00925	0.903649	0.946237	0.953047	0.0531301	0.0226817	1.15632	0.0557477
IPI00372941.1	Samm50 Sorting and assembly machinery component 50 homolog	6	6	5	5.66667	12.79	12.79	10.02	11.8667	0.946237	0.862979	0.912011	0.907075	0.0418481	0.416869	0.831764	0.946237	0.731623	0.278529	0.806574	0.194631	0.3807	0.855067	0.92045	1.03753	0.937681	0.0924431	1.03374	0.320024	0.0985869	0.704693	0.879022	0.679204	0.754306	0.108757	0.061098	0.831581	0.144181
IPI00373076.1	Atp6v1a V-type proton ATPase catalytic subunit A	2	3	2	2.33333	4.052	5.997	4.052	4.70033	1.18032	1.14815	1.13763	1.15537	0.0222423	1.08643	1.02802	0.981748	1.03206	0.0524563	0.893277	0.0198667	0.0508266	1.02802	1.00925	1.01859	1.01862	0.00938151	0.881642	0.00175455	0.00921002	1.1272	1.25892	1.13763	1.17458	0.0732279	0.350079	1.01663	0.0623437
IPI00373168.3	Acss1 Uncharacterized protein	10	8	9	9	15.4	12.61	12.61	13.54	0.691831	0.887156	0.685488	0.754825	0.114646	0.416869	0.737904	0.928966	0.69458	0.258783	0.920187	0.369427	0.372575	0.758578	0.912011	0.855067	0.841885	0.0775613	1.11534	0.172495	0.0921281	0.654636	0.597035	0.619441	0.623704	0.0290361	0.090088	0.82629	0.0465542
IPI00373245.3	Car14 Uncharacterized protein	1	1	1	1	3.561	3.561	3.561	3.561	0.879022	0.801678	0.787046	0.822582	0.0494233	0.679204	0.679204	0.758578	0.705662	0.0458266	0.857862	0.0200247	0.0649413	1	1.01859	1.0666	1.0284	0.0343636	1.2502	0.00290054	0.0334148	0.895365	0.824138	0.879022	0.866175	0.0373109	0.147171	1.053	0.0430754
IPI00373289.1	Arcn1 Coatomer subunit delta	1	1	1	1	2.348	2.348	2.348	2.348	1.10662	0.981748	1.1695	1.08596	0.0955665	1.10662	1.02802	0.772681	0.969107	0.174592	0.892399	0.190953	0.180157	1.0666	1.02802	1.25892	1.11785	0.123692	1.02936	0.371367	0.110652	1.69044	1.21339	1.02802	1.31062	0.341748	0.186926	1.20688	0.260754
IPI00373418.3	Dbt lipoamide acyltransferase component of branched-chain alpha-keto acid dehydrogenase complex, mitochondrial	2	3	3	2.66667	4.149	6.432	6.432	5.671	1.05682	0.831764	0.972747	0.953776	0.11372	0.946237	0.92045	0.981748	0.949478	0.0307774	0.995494	0.477352	0.0324151	0.937562	1.0666	1.02802	1.01072	0.0662321	1.05971	0.252294	0.0655293	0.981748	0.912011	1	0.964586	0.0464372	0.444853	1.01133	0.0481421
IPI00373492.2	Lcp1 Uncharacterized protein	2	5	4	3.66667	4.147	7.337	7.815	6.433	0.619441	6.60694	1.61436	2.94691	3.20847	1.59956	8.3946	1.20226	3.73214	4.04269	1.26646	0.402903	1.08321	0.77983	3.53183	1.13763	1.81643	1.49631	0.616384	0.310434	0.823767	0.870964	3.7325	1.35519	1.98622	1.53158	0.33652	0.674	0.771106
IPI00373587.3	Ppp2r4 Uncharacterized protein	1	1	1	1	3.096	3.096	3.096	3.096	0.212814	1.43219	1.6293	1.09143	0.767262	1.59956	11.3763	1.43219	4.80267	5.69352	4.40034	0.188022	1.18549	1.08643	13.1826	1.65959	5.30953	6.82427	4.86473	0.198242	1.28529	0.319154	0.990832	0.0110662	0.440351	0.501001	0.147921	0.403461	1.13773
IPI00382069.1	Ndrg2 Isoform 1 of Protein NDRG2	3	1	1	1.66667	9.704	4.043	4.043	5.93	1	1	1.09648	1.03216	0.0557016	0.679204	0.879022	1.20226	0.920163	0.263946	0.891494	0.270694	0.286847	1	1.14815	1.31826	1.15547	0.159255	1.11947	0.155663	0.137827	0.772681	0.409261	0.847227	0.67639	0.234324	0.056144	0.655315	0.346433
IPI00382101.4	Srpk3 Serine/threonine kinase 23	1	2	1	1.33333	1.943	2.827	1.943	2.23767	0.981748	1.09648	1.07647	1.05156	0.0612846	1.31826	1.51356	1.69044	1.50742	0.186168	1.4335	0.0202178	0.123501	0.963829	1.05682	1.10662	1.04242	0.0724776	0.991308	0.437919	0.069528	1.22462	1.04713	1.11686	1.12954	0.0894196	0.144467	1.07415	0.0791649
IPI00382191.1	Pgd 6-phosphogluconate dehydrogenase, decarboxylating	1	2	2	1.66667	1.01	2.571	2.571	2.05067	0.92045	1.23595	1.38038	1.17893	0.235209	0.505825	0.954993	0.440555	0.633791	0.280077	0.5376	0.0315147	0.441907	0.0110662	0.704693	0.104713	0.273491	0.376356	0.231983	0.0160967	1.37612	0.963829	1.14815	0.199526	0.770503	0.502996	0.148543	0.653563	0.652815
IPI00382214.1	Psme3 Ab2-371	1	1	1	1	0.7317	0.7317	0.7317	0.7317	0.946237	1.04713	1.0666	1.01999	0.064607	1.00925	1.21339	1.19124	1.13796	0.112013	1.11566	0.103299	0.0984334	0.954993	1.05682	1.04713	1.01965	0.0562012	0.999666	0.497418	0.0551183	0.912011	0.794328	0.990832	0.899057	0.0988903	0.0811682	0.881439	0.109993
IPI00382229.1	Stat1;Stat4 Uncharacterized protein	1	1	1	1	1.03	1.03	1.03	1.03	0.855067	0.946237	0.887156	0.896153	0.0462463	0.879022	1.00925	0.990832	0.959702	0.0704754	1.07091	0.135906	0.0734346	0.937562	1.03753	0.954993	0.976694	0.0533997	1.08987	0.0604786	0.0546739	0.895365	0.765597	0.831764	0.830908	0.0648883	0.118138	0.927194	0.0780932
IPI00382278.2	Cox7b Cytochrome c oxidase subunit 7B, mitochondrial	2	1	1	1.33333	10	10	10	10	0.954993	0.903649	0.824138	0.89426	0.0659306	0.660694	0.744732	0.816582	0.740669	0.0780238	0.828248	0.0307238	0.105342	0.831764	0.92045	0.862979	0.871731	0.0449861	0.974807	0.326852	0.0516055	0.887156	0.679204	0.887156	0.817839	0.120061	0.20147	0.914542	0.146803
IPI00382312.3	Uqcrq Cytochrome b-c1 complex subunit 8	5	5	4	4.66667	34.15	34.15	34.15	34.15	0.895365	0.855067	0.879022	0.876485	0.0202686	0.564937	0.887156	0.912011	0.788035	0.193607	0.899085	0.2561	0.245684	1.0666	1.03753	0.954993	1.01971	0.057897	1.1634	0.01927	0.0567782	0.831764	0.816582	0.946237	0.864861	0.0708813	0.403586	0.986738	0.0819569
IPI00382317.1	Fga Uncharacterized protein	4	2	2	2.66667	7.417	3.836	3.836	5.02967	1.0666	1.58489	1.1272	1.25956	0.283369	1.33045	1.20226	0.711214	1.08131	0.326859	0.858481	0.257794	0.302281	1.08643	1.2942	0.809096	1.06324	0.24338	0.844134	0.20762	0.228904	1.10662	1.21339	0.928966	1.08299	0.143676	0.203765	0.859817	0.132666
IPI00382330.1	Pdhx Uncharacterized protein	5	3	5	4.33333	10.76	6.122	10.39	9.09067	0.963829	0.496592	0.539511	0.666644	0.258263	0.717794	0.549541	0.731139	0.666158	0.101214	0.999271	0.498898	0.151936	1.07647	0.824138	0.870964	0.923856	0.134221	1.38583	0.111577	0.145284	1.58489	0.831764	1.1695	1.19539	0.377231	0.0624357	1.79314	0.315573
IPI00387771.6	LOC100362969;Ppia;LOC100360977 Peptidyl-prolyl cis-trans isomerase A	15	19	16	16.6667	59.76	67.68	64.02	63.82	1.80302	3.04789	1.6293	2.16007	0.77377	2.29087	2.01372	1.10662	1.80374	0.619418	0.835037	0.284376	0.343408	1.21339	1.25892	1.07647	1.18293	0.0949678	0.547633	0.0791838	0.0802821	1.92309	1.48594	1.72187	1.7103	0.218808	0.211293	0.79178	0.127935
IPI00387868.2	Hspa4 Heat shock 70 kDa protein 4	5	7	5	5.66667	7.5	8.81	7.143	7.81767	0.946237	0.92045	1.03753	0.968072	0.0615175	1.01859	0.887156	1.00925	0.971667	0.0733372	1.00371	0.475672	0.0754757	0.963829	0.963829	1.00925	0.97897	0.0262256	1.01126	0.398968	0.0267889	1.04713	1.40605	1.19124	1.21481	0.180616	0.0652163	1.25487	0.148679
IPI00388015.3	Coro1c coronin-1C	1	1	1	1	3.376	3.376	3.376	3.376	1.1695	2.14783	86.2979	29.8717	48.8689	1.05682	1.67494	77.2681	26.6666	43.8232	0.892704	0.468355	1.64337	1.04713	1.35519	75.1623	25.8549	42.7018	0.86553	0.459937	1.65159	1.59956	2.14783	83.1764	28.9746	46.9409	0.491402	0.969967	1.62007
IPI00388086.4	RGD1565131 Ribosomal protein L15	1	2	2	1.66667	4.854	9.223	8.252	7.443	2.24905	1.41906	1.24738	1.6385	0.535679	6.25173	1.67494	1.18032	3.03566	2.79615	1.85271	0.23976	0.9211	3.59749	1.34276	1.14815	2.02947	1.36143	1.23862	0.33967	0.67083	5.10505	1.21339	1.20226	2.5069	2.25007	0.288109	1.53	0.89755
IPI00388209.2	Prkcsh Uncharacterized protein	1	3	3	2.33333	1.524	7.81	5.714	5.016	0.895365	1.28233	1.1695	1.11573	0.199007	1.43219	0.92045	0.60256	0.985066	0.418572	0.882888	0.33015	0.424918	0.903649	0.0110662	0.801678	0.572131	0.488564	0.512786	0.0922206	0.853937	1.0666	0.125893	1.13763	0.776705	0.564738	0.20611	0.69614	0.727095
IPI00388289.2	Cdc42 Isoform 2 of Cell division control protein 42 homolog	1	2	1	1.33333	6.806	12.57	5.759	8.37833	1.0666	0.928966	1.01859	1.00472	0.0698558	1.09648	1.19124	0.887156	1.05829	0.155598	1.05332	0.313526	0.147027	0.981748	0.928966	0.895365	0.93536	0.043545	0.930968	0.115679	0.0465543	1.75388	1.34276	1.21339	1.43668	0.282219	0.0550951	1.42993	0.196439
IPI00389152.4	Cox6b1 Uncharacterized protein	18	16	11	15	69.77	70.93	69.77	70.1567	0.847227	0.188799	0.42462	0.486882	0.333601	0.158489	0.544503	0.809096	0.504029	0.327186	1.03522	0.476185	0.649141	0.666807	0.954993	1.02802	0.883272	0.190987	1.81414	0.0833685	0.216226	1.22462	0.879022	1.01859	1.04074	0.173858	0.0418046	2.13757	0.167052
IPI00389231.1	LOC679739 Uncharacterized protein	3	4	5	4	34.48	43.97	47.41	41.9533	0.990832	1.04713	0.963829	1.0006	0.0424998	0.505825	0.505825	0.862979	0.624876	0.206203	0.624503	0.0409131	0.32999	0.77983	0.937562	0.954993	0.890795	0.0964927	0.890264	0.0887082	0.108322	0.92045	0.586138	0.946237	0.817608	0.200873	0.126325	0.817121	0.245684
IPI00390086.4	Atp5j2 ATP synthase, H+ transporting, mitochondrial F0 complex, subunit f, isoform 2	6	5	4	5	22.34	22.34	27.66	24.1133	0.887156	0.457088	0.496592	0.613612	0.237718	0.731139	0.580764	0.672977	0.661627	0.0758271	1.07825	0.382902	0.114607	0.92045	0.946237	0.847227	0.904638	0.0513637	1.47428	0.0814987	0.0567782	1	0.772681	0.946237	0.906306	0.118804	0.07717	1.477	0.131086
IPI00390343.6	Rpl6 60S ribosomal protein L6	3	4	5	4	14.43	17.79	20.47	17.5633	0.981748	1.21339	0.912011	1.03572	0.157771	1.13763	1.24738	0.895365	1.09346	0.180118	1.05575	0.348988	0.164723	1.0666	1.18032	1.07647	1.10779	0.0630037	1.06959	0.261294	0.0568731	1.11686	1.70608	1.55597	1.45964	0.306193	0.0615284	1.4093	0.209773
IPI00391877.3	- Uncharacterized protein (Fragment)	1	1	1	1	17.12	17.12	17.12	17.12	1.09648	1.22462	1.20226	1.17445	0.0684466	0.912011	1.04713	1.1695	1.04288	0.128797	0.887971	0.107379	0.123501	0.903649	0.990832	1.03753	0.977336	0.067952	0.832163	0.0120093	0.0695277	1.08643	0.928966	0.990832	1.00207	0.0793296	0.0237931	0.853227	0.0791653
IPI00392216.1	LOC299282 Liver regeneration protein lrryan	9	11	8	9.33333	18.82	22.59	18.99	20.1333	0.824138	1.34276	1.0666	1.07783	0.259496	1.43219	0.862979	1.05682	1.11733	0.289389	1.03664	0.434473	0.259001	0.855067	1.08643	0.963829	0.968441	0.115749	0.898507	0.278136	0.119521	0.501187	0.666807	0.704693	0.624229	0.108228	0.0388483	0.579152	0.173379
IPI00392552.4	Scaf11 Uncharacterized protein (Fragment)	1	1	1	1	0.8621	0.8621	0.8621	0.8621	0.613762	0.691831	0.679204	0.661599	0.0419063	0.544503	0.60256	0.679204	0.608755	0.0675639	0.920127	0.162663	0.110987	1.00925	1.07647	0.887156	0.990958	0.0959714	1.49782	0.00768744	0.0968471	0.654636	0.549541	0.758578	0.654252	0.104519	0.459045	0.988895	0.159753
IPI00393333.3	Atic Bifunctional purine biosynthesis protein PURH	6	5	5	5.33333	14.86	12.5	12.67	13.3433	1.01859	0.855067	1.03753	0.970395	0.100325	1.08643	0.928966	1.09648	1.03729	0.0939456	1.06894	0.223439	0.0905683	1.01859	1	1.03753	1.01871	0.0187643	1.04978	0.246778	0.0184197	1.03753	0.903649	1	0.980392	0.0690595	0.447324	1.0103	0.0704407
IPI00393489.2	Sorbs2 Uncharacterized protein	3	2	2	2.33333	4.17	2.548	2.548	3.08867	0.954993	1.55597	0.928966	1.14664	0.354724	1.03753	1.15878	1.23595	1.14408	0.100022	0.997769	0.495683	0.0874255	1.02802	1.94089	1.19124	1.38671	0.486816	1.20937	0.265642	0.351057	0.801678	0.717794	0.809096	0.776189	0.0507075	0.105133	0.676924	0.0653288
IPI00394452.4	- Uncharacterized protein	2	4	6	4	22.55	24.51	38.24	28.4333	0.903649	1.59956	3.63078	2.04466	1.417	1.77011	0.870964	1.25892	1.3	0.450978	0.635801	0.231844	0.346906	0.928966	0.816582	0.185353	0.643634	0.400841	0.314787	0.11194	0.622778	1.01859	1.55597	2.96483	1.84646	1.00511	0.426993	0.903065	0.544346
IPI00394488.2	Gbas Uncharacterized protein	7	7	9	7.66667	20.64	26.69	33.45	26.9267	1	0.972747	0.619441	0.864063	0.212286	0.231207	0.879022	0.691831	0.600687	0.333387	0.695189	0.161596	0.55501	0.724436	0.981748	0.77983	0.828671	0.135431	0.959041	0.410821	0.163431	0.870964	0.862979	0.816582	0.850175	0.0293646	0.460272	0.983927	0.0345395
IPI00396910.1	Atp5a1 ATP synthase subunit alpha, mitochondrial	97	90	86	91	65.28	68.72	66.55	66.85	0.519996	0.130617	0.903649	0.518087	0.38652	0.0847227	0.334195	0.928966	0.449295	0.433731	0.867218	0.423819	0.96536	0.648634	0.648634	0.954993	0.750754	0.176876	1.44909	0.20874	0.235598	0.794328	0.42462	0.981748	0.733565	0.283491	0.241678	1.41591	0.386456
IPI00400573.1	Tubb2c Tubulin beta-2C chain	20	20	14	18	32.13	26.74	30.79	29.8867	1.39316	1.14815	0.981748	1.17435	0.206952	1.75388	1.49969	1.14815	1.46724	0.304164	1.2494	0.124466	0.207304	1.14815	1.09648	0.990832	1.07849	0.0801891	0.918368	0.258251	0.0743532	0.356451	0.37325	0.862979	0.530893	0.287717	0.0198085	0.452073	0.541949
IPI00400615.1	Atp6v1e1 V-type proton ATPase subunit E 1	1	2	1	1.33333	5.752	9.735	4.425	6.63733	0.772681	0.954993	1.15878	0.96215	0.193148	0.963829	1.13763	8.09096	3.39747	4.06561	3.53112	0.204249	1.19666	0.731139	0.855067	8.3946	3.32694	4.38916	3.45781	0.224641	1.31928	1.36773	1.13763	0.990832	1.1654	0.189977	0.131828	1.21124	0.163015
IPI00411230.3	Gstm2 Glutathione S-transferase Mu 2	7	6	8	7	27.52	27.52	36.7	30.58	1.04713	0.83946	0.862979	0.916523	0.113718	0.963829	0.847227	0.824138	0.878398	0.0748806	0.958403	0.328385	0.0852467	1	0.879022	0.879022	0.919348	0.0698464	1.00308	0.48642	0.0759738	0.954993	0.990832	0.946237	0.964021	0.0236285	0.273523	1.05182	0.0245103
IPI00421357.3	Eprs Uncharacterized protein	2	2	1	1.66667	1.653	1.653	0.7937	1.36657	0.954993	1.11686	1.0666	1.04615	0.0828494	0.990832	1.05682	1.10662	1.05142	0.0580841	1.00504	0.466439	0.0552433	0.963829	1.07647	1.10662	1.04897	0.0752627	1.0027	0.483639	0.071749	0.879022	0.954993	0.809096	0.881037	0.0729692	0.0308095	0.84217	0.0828219
IPI00421410.1	Pkn3 protein kinase N3	3	2	2	2.33333	4.067	2.92	2.92	3.30233	1.11686	12.5892	12.942	8.88269	6.72772	1.20226	0.103753	0.103753	0.469923	0.634226	0.0529032	0.0807865	1.34964	1.11686	3.22107	2.24905	2.19566	1.05312	0.247184	0.112613	0.479636	1.0666	10.3753	11.5878	7.67655	5.7564	0.412665	0.864214	0.749868
IPI00421428.9	Pgam1 Phosphoglycerate mutase 1	11	10	5	8.66667	24.41	28.35	15.75	22.8367	0.879022	0.787046	0.0152757	0.560448	0.474368	0.990832	1.04713	0.717794	0.918585	0.176153	1.63902	0.160819	0.191766	0.912011	0.928966	0.0152757	0.618751	0.522694	1.10403	0.446609	0.844756	1.04713	1.24738	0.903649	1.06605	0.172646	0.0991517	1.90215	0.161949
IPI00421451.6	Rps16 40S ribosomal protein S16	2	2	2	2	13.01	13.01	15.75	13.9233	1.09648	1.25892	0.92045	1.09195	0.169283	1.05682	1.18032	0.816582	1.01791	0.184965	0.932191	0.318076	0.181711	1.1695	1.15878	0.879022	1.0691	0.164699	0.979073	0.437525	0.154054	1.7378	1.31826	1.08643	1.38083	0.330165	0.135359	1.26455	0.239106
IPI00421513.8	Got1 Aspartate aminotransferase, cytoplasmic	23	18	20	20.3333	38.74	32.93	39.71	37.1267	0.92045	0.679204	0.60256	0.734071	0.165896	0.328095	0.751623	0.597035	0.558918	0.214321	0.761395	0.164648	0.383458	0.698232	0.937562	0.816582	0.817459	0.119667	1.1136	0.261355	0.146389	0.648634	0.145881	0.380189	0.391568	0.25157	0.0656387	0.53342	0.642467
IPI00421517.7	Des Desmin	14	18	17	16.3333	26.87	34.54	28.57	29.9933	1.21339	1.75388	0.772681	1.24665	0.491445	1.13763	1.18032	1.34276	1.22024	0.108238	0.978813	0.467597	0.0887022	1.1272	1.25892	1.24738	1.21117	0.0729494	0.971538	0.456221	0.0602306	1.47231	4.16869	2.208	2.61634	1.3938	0.112444	2.09869	0.532728
IPI00421539.3	Aco2 Aconitate hydratase, mitochondrial	64	57	52	57.6667	56.92	56.15	55.51	56.1933	0.787046	0.277971	0.258226	0.441081	0.299777	0.0794328	0.349945	0.501187	0.310188	0.213669	0.703246	0.287317	0.688838	0.42462	0.642688	0.654636	0.573981	0.129489	1.30131	0.268195	0.225598	0.855067	0.293765	0.469894	0.539575	0.287065	0.351081	1.2233	0.532021
IPI00421596.1	Lgals9 Uncharacterized protein	1	2	1	1.33333	3.416	7.453	3.416	4.76167	1.08643	1.38038	1.39316	1.28666	0.173522	1.35519	1.22462	1.25892	1.27958	0.0676919	0.994498	0.476124	0.0529018	1.0666	1.23595	0.990832	1.09779	0.1255	0.853213	0.104073	0.11432	1.05682	1.05682	0.928966	1.0142	0.0738152	0.0484229	0.788246	0.0727816
IPI00421626.4	Rps9 40S ribosomal protein S9	2	4	2	2.66667	8.763	17.01	11.86	12.5443	0.990832	1.14815	0.870964	1.00332	0.139016	1.22462	1.36773	0.92045	1.17093	0.228421	1.16706	0.17521	0.195076	0.990832	1.09648	0.831764	0.973025	0.133253	0.969808	0.399388	0.136947	1.21339	1.59956	1.01859	1.27718	0.29569	0.123629	1.27296	0.231518
IPI00421711.1	Atp5l ATP synthase, H+ transporting, mitochondrial F0 complex, subunit G	8	9	9	8.66667	66.02	66.02	66.02	66.02	1.03753	0.398107	0.405508	0.613715	0.367052	0.809096	0.731139	1.64437	1.06154	0.506254	1.72969	0.144316	0.476907	1.30617	0.928966	1.52757	1.25423	0.302661	2.04368	0.0412297	0.241311	0.737904	0.398107	0.505825	0.547279	0.17365	0.398097	0.891748	0.317297
IPI00421857.1	Krt1 Keratin, type II cytoskeletal 1	5	4	2	3.66667	8.32	6.56	3.84	6.24	0.524808	0.744732	0.77983	0.683123	0.138224	0.483059	0.758578	0.731139	0.657592	0.151771	0.962626	0.420033	0.230799	0.483059	0.666807	0.724436	0.624767	0.12606	0.914575	0.30895	0.201772	0.912011	0.83946	0.903649	0.88504	0.0396943	0.0589065	1.29558	0.0448502
IPI00421874.4	Vdac1 Voltage-dependent anion-selective channel protein 1	17	15	20	17.3333	58.66	54.77	69.26	60.8967	1.14815	0.794328	0.731139	0.891207	0.224754	0.322107	0.824138	0.912011	0.686085	0.318262	0.769838	0.209382	0.463881	0.903649	1.14815	1.02802	1.02661	0.122258	1.15193	0.212591	0.11909	1.24738	0.794328	0.92045	0.987387	0.233827	0.317307	1.10792	0.236814
IPI00422076.1	Thbs1 Thrombospondin 1	1	3	2	2	1.026	3.504	1.795	2.10833	1.1272	1.27057	1.21339	1.20372	0.0721754	1.05682	1.41906	1.09648	1.19078	0.198682	0.989253	0.461723	0.16685	1.02802	1.27057	1.04713	1.11524	0.134862	0.926494	0.194464	0.120927	1.11686	1.28233	1	1.13306	0.141861	0.249231	0.941302	0.125201
IPI00464587.1	Tuba8 Tubulin alpha-8 chain	12	14	15	13.6667	24.05	29.18	32.29	28.5067	1.94089	1.52757	1.49969	1.65605	0.247073	1.75388	1.08643	1.21339	1.35123	0.354436	0.815939	0.148087	0.262305	2.03236	1.57036	1.64437	1.74903	0.248142	1.05615	0.334727	0.141874	1.94089	1.61436	1.72187	1.75904	0.166406	0.292902	1.06219	0.0946009
IPI00464620.3	Nqo2 Ribosyldihydronicotinamide dehydrogenase [quinone]	3	3	3	3	16.45	16.45	16.45	16.45	1.20226	0.831764	0.963829	0.999286	0.187778	0.990832	0.809096	1.00925	0.936394	0.110627	0.937063	0.3246	0.118142	1.09648	0.963829	1	1.0201	0.0685713	1.02083	0.435174	0.06722	1.08643	0.990832	1.18032	1.08586	0.0947458	0.264014	1.08664	0.0872542
IPI00464718.1	Ddx5 Uncharacterized protein	1	1	2	1.33333	1.301	1.301	3.089	1.897	73.7904	86.2979	87.0964	82.3949	7.46237	67.9204	84.7227	87.0964	79.9132	10.4537	0.96988	0.378181	0.130813	71.1214	85.5067	87.0964	81.2415	8.80024	0.986001	0.43558	0.108322	65.4636	77.2681	82.4138	75.0485	8.69034	0.165113	0.910839	0.115796
IPI00464730.1	Art3 Uncharacterized protein	2	1	2	1.66667	6.952	4.813	6.952	6.239	0.903649	1.08643	0.831764	0.940613	0.131293	1	1.10662	0.963829	1.02348	0.0742377	1.0881	0.204117	0.0725343	2.0893	1.58489	1.41906	1.69775	0.349081	1.80494	0.0250662	0.205614	0.178649	0.180302	0.185353	0.181435	0.00349281	0.00489176	0.19289	0.019251
IPI00470288.4	Ckb Creatine kinase B-type	25	19	23	22.3333	42.78	40.68	50.92	44.7933	1.14815	0.613762	1.18032	0.980746	0.318224	1.05682	1.5417	0.862979	1.15383	0.349606	1.17648	0.280361	0.302996	1.55597	1.5417	0.539511	1.21239	0.582776	1.23619	0.29355	0.480683	1.09648	0.549541	0.824138	0.823386	0.273469	0.276066	0.839551	0.332128
IPI00470301.1	Cct5 T-complex protein 1 subunit epsilon	1	1	1	1	3.142	3.142	2.033	2.77233	0.758578	0.887156	0.954993	0.866909	0.0997606	0.937562	1.10662	1.03753	1.02724	0.0849994	1.18494	0.0516073	0.0827456	0.879022	0.990832	1	0.956618	0.067356	1.10348	0.137606	0.0704105	1.14815	1.10662	1.0666	1.10712	0.0407813	0.0190967	1.27709	0.0368353
IPI00470317.5	Eef1g Elongation factor 1-gamma	8	5	5	6	18.76	13.5	13.96	15.4067	0.666807	0.981748	1.04713	0.898561	0.20335	1.47231	1.21339	1.07647	1.25406	0.201032	1.39563	0.0488132	0.160306	0.887156	1.1272	1	1.00478	0.120092	1.11821	0.244412	0.119521	0.737904	1.05682	1.00925	0.934658	0.172046	0.413125	1.04017	0.184073
IPI00471530.2	Lap3 Isoform 1 of Cytosol aminopeptidase	3	2	4	3	4.817	2.505	7.129	4.817	0.903649	0.862979	0.731139	0.832589	0.0901809	1.03753	0.772681	0.529663	0.779957	0.254011	0.936786	0.3808	0.325672	1.01859	1.07647	0.744732	0.946596	0.177198	1.13693	0.197244	0.187195	1.01859	1.0666	1.19124	1.09214	0.0891155	0.0119462	1.31174	0.0815969
IPI00471539.4	Suclg2 Suclg2 protein	9	8	11	9.33333	17.97	17.74	23.27	19.66	1.1272	0.928966	1.0666	1.04092	0.101579	0.685488	0.895365	0.954993	0.845282	0.141561	0.812053	0.06547	0.167471	0.912011	0.928966	0.954993	0.93199	0.0216498	0.895352	0.100156	0.0232297	0.895365	0.895365	0.946237	0.912322	0.0293711	0.0756634	0.876457	0.0321938
IPI00471577.1	Uqcrc1 Cytochrome b-c1 complex subunit 1, mitochondrial	41	31	31	34.3333	47.08	45.63	45.42	46.0433	1.0666	0.963829	0.524808	0.851744	0.28776	0.185353	0.972747	0.77983	0.645977	0.410408	0.758417	0.260291	0.63533	0.597035	1.05682	0.691831	0.781895	0.242763	0.917992	0.382234	0.31048	0.794328	0.737904	0.49204	0.674757	0.160734	0.209108	0.792207	0.238209
IPI00471584.7	Hsp90ab1 Heat shock protein HSP 90-beta	21	22	21	21.3333	26.1	25.69	28.18	26.6567	1.20226	0.794328	0.586138	0.86091	0.313413	0.937562	0.928966	0.737904	0.868144	0.112873	1.0084	0.48639	0.130016	1.13763	1.1695	0.879022	1.06205	0.159305	1.23364	0.197734	0.149998	1.64437	1.44544	1.52757	1.53913	0.0999685	0.0266458	1.78779	0.0649515
IPI00471647.1	Ndufs2 NADH dehydrogenase [ubiquinone] iron-sulfur protein 2, mitochondrial	23	21	22	22	37.37	37.37	42.76	39.1667	0.903649	0.380189	0.413047	0.565629	0.293195	0.157036	0.591562	0.731139	0.493246	0.299413	0.872031	0.389857	0.607026	0.862979	0.946237	0.972747	0.927321	0.057277	1.63945	0.0809084	0.0617661	1.08643	0.448745	0.448745	0.661306	0.368165	0.371685	1.16915	0.556725
IPI00471774.3	Rangap1 Uncharacterized protein	1	1	1	1	2.048	2.048	2.048	2.048	0.855067	0.954993	0.937562	0.915874	0.0533768	0.711214	0.816582	0.912011	0.813269	0.10044	0.887971	0.107378	0.123501	0.831764	0.912011	0.954993	0.899589	0.0625465	0.982219	0.374625	0.0695279	1.61436	1.38038	1.47231	1.48902	0.117879	0.00296497	1.62579	0.0791654
IPI00471889.7	Anxa5 Annexin A5	17	17	14	16	47.96	54.55	42.32	48.2767	0.912011	1.00925	1.28233	1.06786	0.191992	1.65959	1.0666	1.75388	1.49335	0.372579	1.39845	0.0885886	0.249491	1.19124	0.972747	0.937562	1.03385	0.137436	0.968147	0.408228	0.132936	0.772681	1.08643	0.990832	0.94998	0.160813	0.230991	0.889606	0.16928
IPI00475474.3	Rps4x;LOC100362640;LOC100364620 40S ribosomal protein S4, X isoform	1	1	1	1	3.802	3.802	3.802	3.802	1.01859	1.14815	1.1272	1.09798	0.0695476	1.31826	1.36773	0.855067	1.18035	0.282788	1.07502	0.334005	0.23958	1.02802	1.01859	0.912011	0.986206	0.0644275	0.898199	0.0555427	0.0653286	1.24738	1.61436	1.11686	1.3262	0.257944	0.130927	1.20785	0.194498
IPI00476458.6	Gpx3 Glutathione peroxidase	2	1	2	1.66667	7.895	5.263	8.772	7.31	1.02802	1.36773	1.0666	1.15411	0.185999	1.19124	1.33045	0.972747	1.16481	0.180312	1.00927	0.4732	0.154799	0.887156	1.05682	0.937562	0.960512	0.0871282	0.832251	0.103108	0.0907102	1.19124	1.23595	1.11686	1.18135	0.060155	0.414148	1.0236	0.0509206
IPI00476478.1	LOC100360507 inducible carbonyl reductase-like	3	4	3	3.33333	12.27	17.33	12.27	13.9567	0.954993	0.928966	0.772681	0.885547	0.0986072	0.954993	1.14815	1.0666	1.05658	0.0969694	1.19314	0.0494403	0.0917766	1.07647	1.15878	1.07647	1.1039	0.0475228	1.24658	0.0216986	0.0430499	0.912011	0.831764	0.879022	0.874266	0.0403345	0.433798	0.987261	0.0461353
IPI00476545.1	Crp Ba2-693	3	6	4	4.33333	0.9852	3.153	3.153	2.4304	1.20226	1.21339	1.61436	1.34334	0.234778	1.09648	0.954993	0.824138	0.958536	0.136205	0.713548	0.0428383	0.142096	1.08643	0.990832	0.963829	1.0137	0.0644172	0.75461	0.0635496	0.0635468	0.981748	1.02802	0.685488	0.898417	0.185848	0.0324713	0.668795	0.206861
IPI00480620.1	Bdh1 D-beta-hydroxybutyrate dehydrogenase, mitochondrial	8	9	11	9.33333	20.93	22.97	28.2	24.0333	1.02802	0.928966	0.963829	0.973604	0.0502431	0.30761	0.801678	0.92045	0.676579	0.325008	0.694922	0.12632	0.48037	1.09648	1.39316	0.981748	1.15713	0.212304	1.1885	0.135229	0.183475	0.937562	0.765597	0.92045	0.874536	0.0947315	0.103299	0.898246	0.108322
IPI00480639.3	C3 Complement C3 (Fragment)	13	20	16	16.3333	11	14.97	13.23	13.0667	1.83654	1.00925	1.05682	1.30087	0.464512	2.46604	1.01859	0.711214	1.39861	0.937105	1.07514	0.440968	0.670024	1.57036	1.05682	0.731139	1.11944	0.423102	0.860532	0.321729	0.377959	0.765597	1.01859	0.824138	0.869442	0.132442	0.122397	0.668354	0.15233
IPI00480842.3	Snx3 Sorting nexin-3	1	1	1	1	8.642	8.642	8.642	8.642	0.855067	0.92045	0.903649	0.893055	0.0339545	1.36773	0.847227	0.946237	1.05373	0.2764	1.17992	0.210124	0.262306	0.928966	0.0115878	0.0114815	0.317345	0.529679	0.355348	0.100012	1.6691	0.801678	0.879022	0.937562	0.872754	0.0681585	0.338158	0.977268	0.0780958
IPI00515816.1	Lgmn Uncharacterized protein	1	1	1	1	3.908	3.908	3.908	3.908	1.01859	0.855067	1.11686	0.99684	0.132247	1.31826	1.1695	1.70608	1.39795	0.277025	1.40238	0.0563612	0.198166	1.19124	1.10662	1.38038	1.22608	0.140166	1.22997	0.0543168	0.11432	0.903649	0.912011	0.824138	0.879933	0.0485001	0.130969	0.882722	0.055118
IPI00551702.2	Dlst Dihydrolipoyllysine-residue succinyltransferase component of 2-oxoglutarate dehydrogenase complex, mitochondrial	15	12	14	13.6667	29.96	27.97	29.3	29.0767	1.08643	0.549541	0.416869	0.684279	0.354531	0.359749	0.608135	0.698232	0.555372	0.175302	0.811617	0.306405	0.315647	1.02802	0.83946	0.831764	0.899747	0.111151	1.31488	0.202911	0.123536	0.816582	0.296483	0.465586	0.526217	0.265298	0.286183	0.76901	0.50416
IPI00551812.1	Atp5b ATP synthase subunit beta, mitochondrial	119	107	106	110.667	69.38	69.94	71.08	70.1333	0.544503	0.824138	0.187068	0.51857	0.319326	0.0963829	0.83946	0.539511	0.491785	0.37383	0.948348	0.464732	0.760151	0.534564	0.903649	0.60256	0.680258	0.196427	1.3118	0.2522	0.288754	0.679204	0.862979	0.409261	0.650481	0.228219	0.297398	1.25438	0.350846
IPI00554328.1	Pdk1 Pyruvate dehydrogenase kinase, isozyme 1	3	4	4	3.66667	8.525	10.14	10.14	9.60167	0.954993	0.698232	0.711214	0.788146	0.144639	0.870964	0.648634	0.758578	0.759392	0.111167	0.963516	0.399603	0.146389	0.990832	0.737904	0.937562	0.888766	0.133337	1.12767	0.213009	0.150025	0.937562	0.870964	0.963829	0.924118	0.0478701	0.120072	1.17252	0.0518009
IPI00555171.3	Tagln2 Transgelin-2	5	8	7	6.66667	17.59	23.62	27.64	22.95	0.887156	1.38038	2.48886	1.58547	0.820308	1.14815	1.47231	0.794328	1.13826	0.3391	0.717937	0.227181	0.29791	0.92045	1.1272	0.685488	0.911045	0.221005	0.574623	0.144121	0.242584	1.18032	1.58489	1.10662	1.29061	0.257504	0.301969	0.814028	0.199521
IPI00555185.1	Rab10 RAB10, member RAS oncogene family, isoform CRA_a	3	3	2	2.66667	17	17	11.5	15.1667	1.01859	0.0685488	0.824138	0.637093	0.501881	1.02802	1.47231	1.72187	1.4074	0.351452	2.2091	0.0514823	0.249717	1.04713	1.40605	3.34195	1.93171	1.23442	3.03207	0.101571	0.639029	1.01859	1.05682	1.35519	1.14353	0.184294	0.107974	1.79492	0.161162
IPI00555212.1	Cdc26 Anaphase-promoting complex subunit CDC26	1	1	1	1	12.94	12.94	12.94	12.94	0.691831	0.765597	0.751623	0.73635	0.0391827	0.544503	0.630957	0.704693	0.626718	0.0801793	0.851114	0.0631288	0.127935	0.660694	0.731139	0.765597	0.719143	0.0534705	0.976632	0.339141	0.0743531	0.011272	0.011695	0.0123595	0.0117755	0.000548195	0.000485696	0.0159917	0.0465539
IPI00555252.3	LOC685186;Gapdh Glyceraldehyde-3-phosphate dehydrogenase	54	50	46	50	74.47	74.47	72.37	73.77	1.19124	0.529663	0.666807	0.795904	0.349172	0.349945	0.758578	0.946237	0.68492	0.304894	0.860556	0.350006	0.445152	1.20226	0.946237	1.18032	1.10961	0.141908	1.39415	0.128301	0.12789	1.38038	0.83946	1.1272	1.11568	0.270646	0.141066	1.40178	0.242584
IPI00555265.1	Nnt Uncharacterized protein	37	32	35	34.6667	29.65	26.7	27.35	27.9	0.772681	0.319154	0.60256	0.564798	0.229109	0.143219	0.501187	0.630957	0.425121	0.25261	0.752696	0.258794	0.594207	0.630957	0.758578	0.772681	0.720739	0.0780718	1.2761	0.18079	0.108322	0.60256	0.353183	0.457088	0.470944	0.125264	0.288203	0.833827	0.265986
IPI00555287.3	Sptbn1 Non-erythroid spectrin beta	8	7	8	7.66667	3.851	3.597	4.063	3.837	1.33045	0.954993	0.963829	1.08309	0.214267	1.8197	1.1272	1.08643	1.34444	0.412091	1.2413	0.200735	0.306515	1.36773	0.937562	0.937562	1.08095	0.248357	0.998023	0.495766	0.229758	1.39316	1.08643	1.00925	1.16295	0.203069	0.331936	1.07373	0.174616
IPI00555303.2	Pcmt1 Protein-L-isoaspartate(D-aspartate) O-methyltransferase	1	1	1	1	7.489	7.489	7.489	7.489	0.672977	0.77983	0.794328	0.749045	0.0662747	0.831764	0.895365	0.954993	0.89404	0.0616251	1.19357	0.0251832	0.0689288	0.862979	0.92045	0.946237	0.909888	0.0426222	1.21473	0.0156382	0.0468433	1.44544	1.1695	1.20226	1.2724	0.150749	0.00742039	1.6987	0.118476
IPI00555310.1	Adck3 Chaperone activity of bc1 complex-like, mitochondrial	4	4	4	4	8.937	9.399	9.399	9.245	0.816582	0.879022	1.20226	0.965956	0.207016	0.334195	0.83946	0.946237	0.706631	0.326928	0.731535	0.160537	0.462657	0.636796	0.903649	0.963829	0.834758	0.174061	0.864178	0.224697	0.208517	0.870964	0.912011	0.895365	0.89278	0.0206454	0.30165	0.924244	0.0231248
IPI00556929.4	Vdac3 Isoform 1 of Voltage-dependent anion-selective channel protein 3	7	7	11	8.33333	30.39	31.45	39.93	33.9233	0.57544	0.47863	0.409261	0.487777	0.0834663	0.30761	0.549541	0.642688	0.499946	0.172957	1.02495	0.459897	0.345951	0.751623	0.787046	0.711214	0.749961	0.0379434	1.53751	0.00933423	0.0505939	0.672977	0.42462	0.648634	0.582077	0.136904	0.18851	1.19333	0.235199
IPI00557206.3	Gbp1 guanylate binding protein 1, interferon-inducible, 67kDa	2	1	1	1.33333	2.949	1.667	1.667	2.09433	1.04713	1	0.990832	1.01265	0.0302064	0.937562	0.824138	0.928966	0.896889	0.0631504	0.885682	0.0339152	0.0704105	1	1.01859	1.07647	1.03169	0.0398788	1.01879	0.274213	0.0386541	0.862979	0.679204	0.724436	0.755539	0.0957542	0.0168202	0.746098	0.126736
IPI00557327.1	Ndufa8 Uncharacterized protein	10	9	9	9.33333	58.14	54.65	50.58	54.4567	0.981748	1.03753	0.981748	1.00034	0.0322047	0.387258	0.83946	0.946237	0.724318	0.296745	0.724071	0.123782	0.409689	0.619441	0.809096	0.928966	0.785834	0.156068	0.785566	0.067533	0.198602	0.972747	0.765597	0.946237	0.89486	0.112728	0.121121	0.894555	0.125972
IPI00558635.3	Hibch Isoform 1 of 3-hydroxyisobutyryl-CoA hydrolase, mitochondrial	1	0	0	0.333333	2.597	0	0	0.865667	1	0.855067	1.18032	1.0118	0.162948	0.847227	0.972747	1.27057	1.03018	0.217439	1.01817	0.456384	0.211068	0.887156	0.946237	1.15878	0.99739	0.142853	0.985762	0.456985	0.143227	0.870964	0.787046	0.724436	0.794148	0.0735216	0.0662935	0.78489	0.0925791
IPI00560366.2	Kars Lysyl-tRNA synthetase	1	2	1	1.33333	1.757	2.556	1.757	2.02333	0.77983	0.183654	0.990832	0.651439	0.418626	1.20226	1.77011	87.9023	30.2915	49.8931	46.4995	0.205832	1.6471	0.758578	1.19124	87.9023	29.9507	50.188	45.9762	0.209191	1.67569	1.44544	0.77983	87.9023	30.0425	50.1091	0.208286	46.1172	1.66794
IPI00561017.1	Prdx5 Uncharacterized protein	4	5	6	5	21.6	29.58	38.97	30.05	0.946237	1.03753	0.737904	0.907223	0.153575	0.751623	0.954993	0.691831	0.799482	0.137954	0.881241	0.208838	0.172555	1.01859	0.981748	0.981748	0.994029	0.0212714	1.09568	0.215607	0.0213992	0.831764	0.879022	0.591562	0.767449	0.154145	0.164115	0.845932	0.200854
IPI00561513.1	Ndufa10 NADH dehydrogenase [ubiquinone] 1 alpha subcomplex subunit 10, mitochondrial	15	11	11	12.3333	41.69	36.34	33.52	37.1833	0.711214	0.505825	0.586138	0.601059	0.103504	0.20893	0.49204	0.597035	0.432668	0.200749	0.719843	0.143637	0.46398	0.625173	0.794328	0.937562	0.785688	0.156374	1.30717	0.0870779	0.199028	0.679204	0.405508	0.554626	0.546446	0.137031	0.306567	0.909139	0.250767
IPI00561751.1	LOC100364354;LOC100365025;Ndufs5;LOC100361505;LOC100363268 Uncharacterized protein	7	6	7	6.66667	50	50	50	50	1.02802	0.862979	1.00925	0.966749	0.0903564	0.444631	0.619441	1.00925	0.691108	0.289053	0.714879	0.117719	0.418245	0.794328	0.92045	1.02802	0.914265	0.116967	0.94571	0.286891	0.127935	0.981748	0.316228	0.963829	0.753935	0.379171	0.217651	0.779866	0.502923
IPI00561761.2	Tnnt2 Uncharacterized protein	42	37	39	39.3333	49	48.67	45.33	47.6667	0.912011	0.246604	0.316228	0.491614	0.365735	0.135519	0.428549	0.824138	0.462735	0.34558	0.941257	0.462806	0.746821	0.879022	0.912011	1.00925	0.933429	0.0677056	1.8987	0.0838413	0.0725343	1.15878	0.328095	0.862979	0.783284	0.421036	0.208594	1.59329	0.537527
IPI00561794.1	Hrc 87 kDa protein	8	3	3	4.66667	13.4	5.172	5.305	7.959	0.895365	0.11695	0.648634	0.55365	0.397805	0.359749	0.654636	0.591562	0.535316	0.155281	0.966885	0.473036	0.290074	0.564937	1.52757	0.831764	0.974756	0.49699	1.7606	0.159307	0.509861	0.619441	1.59956	1	1.073	0.494119	0.11612	1.93805	0.460503
IPI00562798.1	Sirt2 Uncharacterized protein	1	1	1	1	3.101	3.101	3.101	3.101	0.946237	1.05682	1.03753	1.01353	0.0590682	0.816582	0.937562	1.05682	0.936987	0.120119	0.924481	0.198469	0.128197	0.765597	0.83946	0.879022	0.828026	0.0575708	0.816975	0.00881656	0.0695278	0.731139	0.625173	0.666807	0.674373	0.0533869	0.000935563	0.665372	0.0791652
IPI00562850.2	Ptbp1 Uncharacterized protein	1	2	2	1.66667	4.152	5.776	5.776	5.23467	0.946237	0.501187	0.510505	0.652643	0.254303	0.824138	1	1.1272	0.983779	0.15218	1.50738	0.0703874	0.154689	1.04713	0.529663	0.559758	0.712183	0.290461	1.09123	0.401398	0.407847	0.0155597	0.0515229	0.0529663	0.0400163	0.0211924	0.0260036	0.0613142	0.529593
IPI00563195.3	Dysf Uncharacterized protein	4	3	3	3.33333	2.382	1.858	1.858	2.03267	1.09648	1.00925	1.11686	1.0742	0.0571601	1.07647	0.946237	1.1272	1.04997	0.0933452	0.977442	0.36234	0.088903	1.03753	1.01859	1.1272	1.06111	0.0580155	0.987812	0.397242	0.0546746	1.18032	1.01859	1.11686	1.10526	0.0814871	0.310336	1.02891	0.0737267
IPI00563501.4	- Uncharacterized protein (Fragment)	1	1	0	0.666667	0.1366	0.1366	0	0.0910667	0.972747	1.0666	1.04713	1.02882	0.0495298	1.0666	1.03753	1.1695	1.09121	0.0693425	1.06064	0.140115	0.0635466	1.03753	1.10662	1.15878	1.10098	0.0608215	1.07013	0.0946081	0.0552432	0.879022	0.711214	0.758578	0.782938	0.0865161	0.0104359	0.761003	0.110502
IPI00564133.1	Kat3 Kynurenine--oxoglutarate transaminase 3	2	2	2	2	5.286	5.286	5.286	5.286	1.22462	0.928966	0.816582	0.990055	0.210765	1.08643	0.724436	0.597035	0.802632	0.253893	0.810695	0.191334	0.316326	1.0666	1.07647	1.24738	1.13015	0.101648	1.1415	0.189393	0.0899425	1.05682	1.20226	2.29087	1.51665	0.674425	0.153797	1.53188	0.444681
IPI00564330.1	Rab5c Uncharacterized protein	2	1	3	2	9.483	5.172	18.53	11.0617	36.6438	0.972747	0.887156	12.8346	20.6194	57.544	1.31826	0.580764	19.8143	32.6769	1.54383	0.386363	1.64916	43.6516	0.954993	0.787046	15.1312	24.6995	1.17894	0.453875	1.63236	42.462	0.0125892	0.717794	14.3974	24.3071	0.468252	1.12177	1.68829
IPI00564409.3	RGD1309537 Myosin regulatory light chain RLC-A	6	5	5	5.33333	31.98	31.98	27.91	30.6233	6.91831	17.0608	3.37287	9.11733	7.104	5.49541	10.1859	0.586138	5.42249	4.8003	0.594745	0.251131	0.885258	4.44631	4.09261	1.20226	3.24706	1.77966	0.356142	0.143249	0.548082	6.08135	14.1906	3.13329	7.80174	5.72588	0.407809	0.855704	0.733924
IPI00565256.3	Nebl Uncharacterized protein	3	5	3	3.66667	4.331	6.89	4.331	5.184	1.0666	0.903649	1.0666	1.01228	0.0940773	1.02802	1.00925	1.14815	1.06181	0.0753643	1.04893	0.258869	0.0709774	1.1272	1.09648	1.23595	1.15321	0.0732822	1.13922	0.0571321	0.0635464	1.11686	0.981748	0.954993	1.01787	0.0867698	0.471689	1.00552	0.0852466
IPI00565708.2	Hp Isoform 1 of Haptoglobin	1	4	2	2.33333	2.882	11.53	6.34	6.91733	1.00925	0.666807	0.990832	0.888964	0.192614	0.737904	0.483059	0.135519	0.452161	0.302379	0.508638	0.0573873	0.668742	1.11686	0.92045	0.731139	0.922817	0.192873	1.03808	0.420101	0.209004	1.18032	0.487529	1.18032	0.94939	0.399984	0.414693	1.06797	0.421306
IPI00567560.1	Postn Uncharacterized protein	3	6	3	4	4.773	7.041	3.699	5.171	0.912011	1.20226	1.13763	1.08397	0.152385	1.67494	1.64437	1.38038	1.56657	0.161962	1.44522	0.00996385	0.103386	0.981748	0.895365	0.903649	0.926921	0.0476621	0.855119	0.104934	0.0514198	0.972747	1.47231	1.13763	1.19423	0.254547	0.281033	1.10172	0.213147
IPI00568450.3	Clybl Isoform 1 of Citrate lyase subunit beta-like protein, mitochondrial	1	1	1	1	5.917	5.917	5.917	5.917	1.00925	1.1272	1.10662	1.08103	0.0630019	0.765597	0.879022	0.990832	0.878484	0.112619	0.81264	0.0345448	0.128197	0.928966	1.01859	1.0666	1.00472	0.0698558	0.929412	0.116717	0.0695277	1	0.855067	0.912011	0.922359	0.0730187	0.0237927	0.853226	0.0791652
IPI00569085.1	Itga6 integrin, alpha 6 isoform 1	1	1	1	1	1.284	1.284	1.284	1.284	0.685488	0.758578	0.744732	0.729599	0.0388235	0.642688	0.737904	0.831764	0.737452	0.0945388	1.01076	0.451779	0.128197	0.544503	0.60256	0.630957	0.592673	0.0440671	0.812327	0.00806277	0.0743532	0.912011	0.77983	0.831764	0.841202	0.0665938	0.0407023	1.15296	0.0791651
IPI00627068.1	Sfpq Splicing factor proline/glutamine rich	1	1	1	1	2.146	2.146	2.146	2.146	0.92045	1.0666	1.01859	1.00188	0.0744927	1.11686	1.31826	1.40605	1.28039	0.148265	1.27799	0.0317167	0.115797	0.879022	1.10662	1.00925	0.9983	0.114195	0.996428	0.483124	0.11439	0.831764	1.07647	0.751623	0.886617	0.169226	0.182916	0.884954	0.190867
IPI00655289.2	Hyou1 Uncharacterized protein	1	2	1	1.33333	1.301	2.202	1.301	1.60133	0.83946	0.879022	1.18032	0.966268	0.186428	0.448745	0.816582	0.903649	0.722992	0.241462	0.748232	0.121804	0.333975	1.0666	1.23595	1.35519	1.21924	0.14502	1.26181	0.0707431	0.118942	1.45881	0.946237	0.963829	1.12296	0.290991	0.241637	1.16216	0.259129
IPI00734576.2	Mt-nd3 NADH-ubiquinone oxidoreductase chain 3	1	1	1	1	13.04	13.04	13.04	13.04	0.787046	0.870964	1.03753	0.898512	0.127493	0.862979	0.963829	1.19124	1.00602	0.168149	1.11965	0.215386	0.167143	1.05682	1.1272	1.18032	1.12145	0.0619521	1.24811	0.0376014	0.0552431	0.862979	0.895365	0.963829	0.907391	0.0514895	0.459456	1.00988	0.0567446
IPI00734582.1	Dnaja3 TID1	1	2	2	1.66667	2.649	4.194	4.194	3.679	0.912011	1	1.01859	0.976867	0.0569314	0.972747	1	1.11686	1.02987	0.0765605	1.05426	0.197303	0.0743399	1.02802	1.1695	1.24738	1.1483	0.111209	1.17549	0.0492333	0.0968471	0.981748	0.704693	0.765597	0.817346	0.145596	0.094675	0.836701	0.178133
IPI00734673.2	Mt-cyb Cytochrome b	3	3	2	2.66667	4.211	4.211	3.947	4.123	0.990832	1.03753	1.01859	1.01565	0.0234865	0.737904	0.879022	1.05682	0.891248	0.159808	0.877515	0.154584	0.179308	0.83946	0.870964	1	0.903475	0.0850646	0.889553	0.0708427	0.0941528	0.862979	0.483059	0.855067	0.733701	0.217099	0.0759532	0.722396	0.295895
IPI00734679.2	Mt-atp8 ATP synthase protein 8	3	2	2	2.33333	40.3	31.34	31.34	34.3267	1.01859	0.787046	0.794328	0.866655	0.131631	0.824138	0.887156	0.870964	0.860753	0.0327263	0.993189	0.473052	0.0380206	0.990832	0.972747	0.990832	0.984804	0.0104412	1.13633	0.129911	0.0106024	1.01859	0.879022	1	0.965871	0.0757854	0.167803	1.11448	0.0784633
IPI00734686.2	Mt-co2 Cytochrome c oxidase subunit 2	19	17	14	16.6667	47.14	44.49	29.52	40.3833	0.413047	0.172187	0.737904	0.441046	0.283896	0.0972747	0.376704	0.831764	0.435247	0.370728	0.986852	0.491968	0.851763	0.349945	0.636796	0.903649	0.63013	0.276912	1.42872	0.227672	0.439453	0.409261	0.356451	0.765597	0.510436	0.222547	0.378317	1.15733	0.435995
IPI00734731.2	Mt-nd5 NADH-ubiquinone oxidoreductase chain 5	3	2	2	2.33333	3.777	4.598	6.076	4.817	1.01859	0.758578	0.847227	0.874799	0.132181	0.870964	0.92045	0.824138	0.87185	0.0481619	0.99663	0.48686	0.055241	0.981748	0.937562	0.990832	0.970047	0.0284974	1.10888	0.168846	0.0293773	1.00925	0.928966	0.895365	0.944528	0.0585171	0.234839	1.07971	0.0619538
IPI00734740.2	LOC498555 Uncharacterized protein	3	2	2	2.33333	28.7	21.74	21.74	24.06	0.879022	0.981748	0.887156	0.915975	0.0571056	0.937562	1	0.963829	0.96713	0.0313496	1.05585	0.132065	0.0324151	0.855067	0.954993	0.887156	0.899072	0.0510175	0.981546	0.360944	0.0567446	0.751623	1.08643	1	0.946016	0.173807	0.39929	1.0328	0.183725
IPI00734781.2	Mt-nd1 NADH-ubiquinone oxidoreductase chain 1	1	3	2	2	2.516	5.346	5.031	4.29767	0.0765597	0.325087	0.77983	0.393826	0.356639	0.11272	0.465586	0.895365	0.491224	0.391952	1.24731	0.383143	0.797909	2.18776	0.937562	1.01859	1.38131	0.699586	3.5074	0.0591738	0.506468	0.887156	1.22462	1.2942	1.13532	0.217716	0.0239004	2.88281	0.191766
IPI00760133.2	Fh1 Uncharacterized protein	13	12	12	12.3333	28.99	22.49	23.47	24.9833	1.01859	0.879022	0.765597	0.887737	0.126722	0.390841	0.824138	0.77983	0.664936	0.238405	0.749024	0.123467	0.358538	0.625173	0.895365	0.928966	0.816501	0.166545	0.919756	0.294642	0.203974	0.580764	0.570164	0.758578	0.636502	0.105853	0.0298685	0.716994	0.166305
IPI00763589.2	LOC684681 histone cluster 1, H1c-like	7	6	6	6.33333	30.19	26.89	28.3	28.46	0.895365	1.04713	0.92045	0.954314	0.0813524	1.44544	1.6293	1.34276	1.4725	0.14517	1.54299	0.00553132	0.0985871	0.912011	1.18032	0.47863	0.856987	0.354067	0.898013	0.342181	0.413153	0.772681	0.772681	0.619441	0.721601	0.0884729	0.0143888	0.756146	0.122606
IPI00763620.1	RGD1564209 Isobutyryl-CoA dehydrogenase, mitochondrial-like	2	1	2	1.66667	6.326	3.406	5.353	5.02833	0.990832	0.937562	0.887156	0.938517	0.0518446	0.862979	0.954993	1.0666	0.961522	0.101966	1.02451	0.375406	0.106046	1.00925	1.02802	0.787046	0.941438	0.134037	1.00311	0.487224	0.142374	0.92045	0.954993	1.10662	0.994022	0.0990338	0.226317	1.05914	0.0996294
IPI00764567.1	Adssl1 adenylosuccinate synthase like 1-like isoform 2	3	2	4	3	11.82	7.659	14.22	11.233	1.01859	1.02802	0.731139	0.925915	0.168747	0.765597	0.787046	0.737904	0.763516	0.0246367	0.824606	0.117886	0.0322675	0.928966	0.831764	0.77983	0.846853	0.0757046	0.914612	0.258357	0.0893951	0.928966	0.83946	0.794328	0.854252	0.068527	0.275223	0.922602	0.0802188
IPI00764886.2	Dnah2 dynein, axonemal, heavy chain 2	1	2	2	1.66667	0.1582	0.2937	0.2937	0.248533	14.4544	58.0764	0.990832	24.5072	29.841	23.9883	79.4328	0.990832	34.804	40.3239	1.42015	0.370803	1.1586	21.2814	73.7904	8.3946	34.4888	34.6407	1.40729	0.362473	1.00441	0.990832	0.990832	0.103753	0.695139	0.512155	0.150521	0.0283647	0.736767
IPI00764950.1	LOC685322 ubiquinol-cytochrome c reductase complex 7.2kDa protein	5	6	6	5.66667	50	50	50	50	0.549541	0.140605	0.57544	0.421862	0.24392	0.239883	0.409261	0.704693	0.451279	0.235236	1.06973	0.443884	0.521266	0.401791	0.322107	0.809096	0.510998	0.261217	1.21129	0.34406	0.51119	0.554626	0.346737	0.691831	0.531064	0.173749	0.282691	1.25886	0.327172
IPI00765365.1	Erlin1 Uncharacterized protein	1	1	1	1	3.448	3.448	3.448	3.448	0.963829	0.879022	0.954993	0.932615	0.046622	0.954993	1.13763	1.21339	1.102	0.132831	1.18163	0.073543	0.120536	0.928966	0.405508	0.963829	0.766101	0.312769	0.821455	0.227241	0.40826	0.972747	0.591562	0.870964	0.811757	0.197369	0.200519	0.87041	0.243138
IPI00765682.3	Pcca Propionyl-CoA carboxylase alpha chain, mitochondrial	6	6	8	6.66667	10.58	10.58	15.06	12.0733	1.05682	1.08643	0.879022	1.00742	0.112179	0.765597	0.990832	0.903649	0.886693	0.113571	0.88016	0.130194	0.128084	0.847227	1.02802	0.937562	0.937602	0.0903943	0.930694	0.225232	0.0964101	1.13763	0.963829	0.963829	1.02176	0.100342	0.438513	1.01423	0.0982052
IPI00765842.4	Psmd11 Uncharacterized protein	1	1	1	1	2.474	2.474	2.474	2.474	1.0666	1.19124	0.903649	1.05383	0.144221	1.27057	1.45881	1.01859	1.24933	0.220879	1.18551	0.139423	0.176799	1.20226	1.31826	1.02802	1.18285	0.146092	1.12243	0.168779	0.123509	1.19124	1.01859	1.04713	1.08565	0.0925485	0.383219	1.0302	0.0852467
IPI00766278.1	LOC687711 small nuclear ribonucleoprotein polypeptide D3-like	1	1	1	1	7.937	7.937	7.937	7.937	1.07647	1.19124	1.18032	1.14934	0.0633497	1.21339	1.39316	1.55597	1.3875	0.171358	1.20722	0.0626115	0.123501	0.954993	1.04713	1.09648	1.03287	0.0718129	0.898658	0.0519737	0.0695278	0.831764	0.711214	0.758578	0.767185	0.0607343	0.00083351	0.667499	0.0791651
IPI00766788.1	Oxct1 Succinyl-CoA:3-ketoacid-coenzyme A transferase 1, mitochondrial	16	17	14	15.6667	32.12	31.92	33.65	32.5633	0.57544	0.138038	0.387258	0.366912	0.219409	0.203236	0.49204	0.613762	0.436346	0.210854	1.18924	0.356445	0.483226	0.731139	0.772681	0.666807	0.723542	0.0533442	1.97198	0.0494973	0.0737264	0.691831	0.331131	0.192309	0.40509	0.257843	0.427448	1.10405	0.636507
IPI00766829.2	Ahnak AHNAK nucleoprotein isoform 1	16	14	15	15	17.82	16.81	17.38	17.3367	1.03753	0.928966	1.01859	0.995028	0.0579897	0.981748	0.613762	0.685488	0.760333	0.195076	0.764132	0.0822444	0.256567	1.01859	0.570164	0.654636	0.747797	0.238287	0.751533	0.104744	0.318652	0.972747	1.18032	1.14815	1.10041	0.111721	0.121395	1.10591	0.101527
IPI00767085.2	Kctd12 potassium channel tetramerisation domain containing 12	0	2	0	0.666667	0	8.869	0	2.95633	9.54993	0.928966	1.09648	3.85846	4.92967	12.942	1.0666	1.48594	5.16483	6.73845	1.33857	0.400478	1.30468	11.8032	0.928966	1.25892	4.6637	6.1852	1.2087	0.4345	1.32624	0.981748	1.1272	0.731139	0.946695	0.200343	0.206946	0.245356	0.211623
IPI00767147.1	Eno1-ps1 enolase 3	21	22	28	23.6667	34.34	40	40.81	38.3833	1.48594	0.369828	0.847227	0.900997	0.559993	2.24905	1.09648	0.765597	1.37038	0.778734	1.52096	0.224447	0.568263	1.15878	0.831764	0.724436	0.904992	0.226241	1.00443	0.495835	0.249992	4.32514	1.25892	1.15878	2.24761	1.79989	0.161951	2.49458	0.800799
IPI00767837.1	Pdcd6ip Programmed cell death 6-interacting protein	2	2	2	2	2.749	2.749	2.749	2.749	0.201372	1.07647	1.09648	0.791438	0.51111	1.38038	1.47231	1.88799	1.58023	0.270464	1.99665	0.0490282	0.171155	0.912011	0.229087	1.13763	0.759575	0.473063	0.95974	0.470333	0.6228	0.141906	0.161436	0.731139	0.344827	0.334699	0.14211	0.435696	0.970628
IPI00768086.2	Pdha1 Uncharacterized protein	19	20	19	19.3333	39.23	41.54	43.08	41.2833	0.963829	0.376704	0.177011	0.505848	0.408998	0.0847227	0.47863	0.515229	0.359527	0.23869	0.710742	0.313645	0.6639	0.672977	0.744732	0.77983	0.732513	0.0544646	1.44809	0.219407	0.0743531	0.937562	0.648634	0.586138	0.724112	0.187476	0.23317	1.43148	0.258905
IPI00768137.2	LOC100361376;RGD1563532 Uncharacterized protein	1	1	1	1	1.555	1.555	1.555	1.555	0.83946	0.809096	0.862979	0.837178	0.0270137	0.862979	0.870964	1.22462	0.986186	0.206525	1.17799	0.16872	0.209418	0.685488	0.60256	0.660694	0.64958	0.0425666	0.775917	0.00259457	0.0655293	1.1272	1.00925	0.83946	0.99197	0.144645	0.100866	1.1849	0.145816
IPI00768173.3	Fundc2 Uncharacterized protein	1	1	1	1	6.623	6.623	6.623	6.623	0.963829	0.870964	0.972747	0.935847	0.056367	0.724436	0.77983	0.895365	0.799877	0.0872099	0.854709	0.0485857	0.109029	0.937562	0.946237	1.00925	0.964351	0.0391277	1.03046	0.258078	0.0405742	0.990832	0.895365	0.946237	0.944145	0.047768	0.427743	1.00887	0.0505939
IPI00768299.1	Arpc3 Actin related protein 2/3 complex, subunit 3 (Predicted), isoform CRA_b	1	1	2	1.33333	6.18	6.18	6.18	6.18	0.660694	0.220801	1.0666	0.649363	0.423012	1.07647	2.0893	2.22844	1.79807	0.628785	2.76897	0.0334912	0.349701	0.83946	1.21339	1.34276	1.13187	0.261367	1.74305	0.0911139	0.230916	0.711214	0.222843	0.0110662	0.315041	0.359064	0.178509	0.485154	1.13974
IPI00768389.3	Lrrfip2 Uncharacterized protein (Fragment)	1	1	1	1	3.704	3.704	3.704	3.704	0.895365	0.990832	0.972747	0.952981	0.0507101	0.625173	0.717794	0.801678	0.714882	0.0882888	0.750153	0.0120569	0.123501	1.15878	1.28233	1.34276	1.26129	0.0937812	1.32352	0.00720434	0.0743533	1.34276	1.14815	1.22462	1.23851	0.0980468	0.0103775	1.29962	0.079165
IPI00768581.2	Acsf3 Uncharacterized protein	3	5	3	3.66667	6.175	10.98	6.175	7.77667	1	0.972747	8.47227	3.48167	4.32201	0.990832	1	10.5682	4.18634	5.52684	1.20239	0.435406	1.32021	1.03753	0.981748	9.28966	3.76965	4.78056	1.08271	0.471031	1.26817	1.01859	1.02802	1.04713	1.03125	0.0145405	0.214818	0.296192	0.0140999
IPI00769025.1	Ndufa1 NADH dehydrogenase [ubiquinone] 1 alpha subcomplex subunit 1	1	1	1	1	7.752	7.752	7.752	7.752	0.831764	0.824138	0.824138	0.82668	0.00440263	0.685488	0.239883	1.10662	0.677332	0.433428	0.81934	0.305598	0.639905	0.990832	0.946237	0.92045	0.952506	0.0356075	1.15221	0.0121146	0.037383	0.937562	0.564937	1.27057	0.924358	0.353004	0.339524	1.11816	0.381891
IPI00769110.2	Rrbp1 ribosome binding protein 1 isoform 3	6	11	8	8.33333	10.25	9.429	7.502	9.06033	1.34276	2.85759	1.38038	1.86025	0.86393	2.07014	2.63027	1.24738	1.9826	0.695587	1.06577	0.429092	0.350846	1.33045	2.29087	1.28233	1.63455	0.568896	0.878675	0.363757	0.348044	0.737904	2.85759	1.03753	1.54434	1.14713	0.36198	0.830181	0.742797
IPI00769165.1	LOC681544 histidine-rich glycoprotein-like	2	2	2	2	4.563	4.563	4.563	4.563	0.963829	0.954993	1.07647	0.998429	0.0677256	1.52757	1.35519	1.22462	1.36912	0.151955	1.37128	0.0177593	0.110987	1.11686	1.13763	1.09648	1.11699	0.0205748	1.11875	0.0415114	0.0184199	0.990832	0.990832	0.870964	0.950876	0.0692061	0.221467	0.952372	0.0727814
IPI00776558.2	Cltc Uncharacterized protein	11	10	9	10	8.696	7.981	7.445	8.04067	0.946237	1.01859	1	0.988276	0.0375748	1.49969	1.01859	0.972747	1.16367	0.291895	1.17748	0.203723	0.250839	1.23595	1.04713	0.972747	1.08527	0.135683	1.09815	0.170528	0.125022	0.737904	1.01859	1.08643	0.94764	0.184776	0.371179	0.958882	0.194986
IPI00778558.2	- Uncharacterized protein	0	1	1	0.666667	0	1.749	1.749	1.166	0.751623	0.660694	0.724436	0.712251	0.0466733	0.972747	0.0937562	0.0113763	0.359293	0.532861	0.504448	0.18496	1.48308	1.11686	0.895365	0.855067	0.955765	0.140963	1.34189	0.0418828	0.147487	0.0233346	0.0862978	0.737904	0.282512	0.395636	0.0996051	0.396647	1.40042
IPI00778578.2	Sdhd Succinate dehydrogenase [ubiquinone] cytochrome b small subunit, mitochondrial	1	1	1	1	4.403	4.403	4.403	4.403	1.09648	1.49969	1.47231	1.35616	0.225306	0.787046	0.912011	1.02802	0.909024	0.120513	0.670294	0.0274481	0.132574	1.00925	1.44544	1.51356	1.32275	0.273626	0.975366	0.439258	0.206861	1.02802	1.21339	1.30617	1.18253	0.141623	0.166228	0.871967	0.119763
IPI00778633.1	Apoh Uncharacterized protein	3	2	1	2	10.14	6.957	2.899	6.66533	1.00925	1.23595	1.02802	1.09107	0.125816	1.28233	1.15878	0.413047	0.951385	0.470289	0.871973	0.33148	0.494321	1.01859	1.07647	1.10662	1.06723	0.0447377	0.978145	0.390525	0.0419196	1.25892	1.58489	0.331131	1.05832	0.650509	0.469539	0.969978	0.614664
IPI00779086.2	- Uncharacterized protein (Fragment)	2	2	2	2	16.23	16.23	16.23	16.23	1.48594	1.31826	1.03753	1.28057	0.226567	1.69044	1.41906	1	1.36983	0.347843	1.0697	0.365687	0.253931	1.25892	1.23595	0.928966	1.14128	0.184227	0.891225	0.22846	0.161422	1.19124	1.36773	1.22462	1.2612	0.0937575	0.450397	0.984868	0.0743401
IPI00780235.2	Rpl13a Uncharacterized protein	2	2	2	2	2.956	2.956	2.956	2.956	0.409261	0.887156	0.879022	0.725146	0.273595	1.34276	0.816582	0.794328	0.984559	0.310415	1.35774	0.169742	0.315284	0.331131	0.666807	0.77983	0.592589	0.233375	0.8172	0.279355	0.393822	0.161436	0.787046	0.870964	0.606482	0.387698	0.344803	0.836358	0.639258
IPI00780332.1	Pgm1 phosphoglucomutase-1	12	10	11	11	19.22	19.57	21.89	20.2267	1.43219	0.937562	1.52757	1.29911	0.316717	1.1695	1.34276	1.78649	1.43292	0.318221	1.103	0.316462	0.222079	1.72187	1.44544	2.60615	1.92449	0.606304	1.48139	0.105497	0.315047	1.14815	1.09648	1.52757	1.2574	0.235394	0.432179	0.967896	0.187207
IPI00780588.2	Psmd9 Uncharacterized protein	2	2	1	1.66667	7.763	7.763	5.479	7.00167	0.903649	1	0.990832	0.964827	0.0531794	1.10662	1.27057	1.43219	1.2698	0.162783	1.31609	0.0356821	0.128197	1.11686	1.22462	1.2942	1.21189	0.0893486	1.25607	0.0110621	0.0737266	0.981748	0.83946	0.895365	0.905524	0.0716859	0.159451	0.938535	0.0791651
IPI00781123.1	Xpnpep1 Xaa-Pro aminopeptidase 1	3	3	1	2.33333	5.405	5.405	2.703	4.50433	2.91072	1.11686	1.43219	1.81992	0.957722	5.7544	1.22462	2.83139	3.27014	2.29654	1.79685	0.19758	0.702277	0.619441	0.954993	0.141906	0.572113	0.408604	0.314361	0.0697018	0.714202	1.43219	0.937562	0.060256	0.810002	0.694804	0.109994	0.445075	0.857781
IPI00781155.1	Akr1cl1 Uncharacterized protein	3	2	2	2.33333	12.35	6.481	6.481	8.43733	1.02802	1.20226	0.824138	1.01814	0.189256	0.879022	1.01859	1.03753	0.978381	0.086566	0.96095	0.381954	0.0884788	1.02802	1.14815	1.02802	1.06806	0.0693617	1.04903	0.350904	0.0649417	0.937562	0.855067	0.912011	0.901546	0.0422314	0.199239	0.885484	0.0468433
IPI00781199.1	LOC100365758;LOC680767 Uncharacterized protein	1	1	1	1	16.53	16.53	16.53	16.53	1.10662	0.912011	1.21339	1.07734	0.152808	1.11686	1.01859	1.44544	1.19363	0.22354	1.10794	0.251675	0.187277	1.11686	1	1.2942	1.13702	0.14813	1.05539	0.326306	0.130279	1.02802	0.928966	0.946237	0.96774	0.0529101	0.170516	0.898267	0.0546739
IPI00781839.2	Hnrnpc Uncharacterized protein	2	4	1	2.33333	6.306	11.71	2.703	6.90633	0.895365	0.912011	0.0110662	0.606147	0.515423	1.13763	1.2942	0.77983	1.07055	0.263662	1.76616	0.129732	0.246286	0.990832	1.13763	0.912011	1.01349	0.114502	1.67202	0.151509	0.112978	0.855067	1.1272	0.111686	0.697984	0.525664	0.419756	1.15151	0.753117
IPI00781944.1	Hnrnpa1 Uncharacterized protein	7	9	8	8	18.77	25.2	22.25	22.0733	1.09648	1.21339	0.981748	1.0972	0.115822	1.39316	1.20226	1.09648	1.23063	0.15036	1.12161	0.147147	0.122181	1.19124	1.15878	0.972747	1.10759	0.117899	1.00946	0.459293	0.106447	1.10662	1.23595	0.870964	1.07118	0.185055	0.424152	0.976279	0.172759
IPI00781977.1	Itga7 129 kDa protein	1	1	1	1	0.9338	0.9338	0.9338	0.9338	1.31826	1.45881	1.44544	1.4075	0.0775787	1.34276	1.5417	1.72187	1.53544	0.189629	1.0909	0.183946	0.123501	0.981748	1.08643	1.13763	1.0686	0.0794537	0.759217	0.00307733	0.074353	1.1272	0.963829	1.02802	1.03968	0.0823068	0.00246961	0.73867	0.0791655
IPI00785564.2	Sdhb Succinate dehydrogenase [ubiquinone] iron-sulfur subunit, mitochondrial	23	17	13	17.6667	43.62	41.49	40.07	41.7267	0.744732	0.270396	0.660694	0.558607	0.253111	0.152757	0.474242	0.895365	0.507454	0.372416	0.908428	0.427417	0.733891	0.77983	0.847227	1.1272	0.918085	0.184206	1.64353	0.0621218	0.200641	0.870964	0.544503	1.05682	0.824095	0.259354	0.136665	1.47527	0.314713
IPI00798619.1	Opa1 Isoform 2 of Dynamin-like 120 kDa protein, mitochondrial	7	4	7	6	7.692	4.635	8.679	7.002	0.895365	0.107647	0.207014	0.403342	0.428991	0.92045	0.83946	0.744732	0.834881	0.0879483	2.06991	0.110112	0.105342	1	0.772681	0.717794	0.830158	0.149625	2.0582	0.110393	0.180237	0.937562	0.277971	0.630957	0.615497	0.330067	0.268377	1.52599	0.536261
IPI00829462.1	Anxa2 Isoform Long of Annexin A2	17	15	15	15.6667	40.76	40.76	40.18	40.5667	1.61436	3.31131	2.60615	2.51061	0.852501	2.24905	2.99226	1.49969	2.247	0.746292	0.895003	0.353957	0.332128	0.794328	1.52757	1	1.1073	0.378212	0.441048	0.0435854	0.341563	1.43219	3.31131	2.67917	2.47422	0.956179	0.481576	0.985507	0.386456
IPI00851115.1	Pccb Uncharacterized protein	8	8	8	8	21.63	21.07	19.96	20.8867	0.744732	0.981748	0.912011	0.879497	0.121807	0.679204	0.981748	0.981748	0.8809	0.174674	1.0016	0.495752	0.19829	0.824138	0.972747	0.912011	0.902965	0.0747163	1.02668	0.39645	0.0827455	1.07647	0.990832	1.01859	1.02863	0.0436902	0.0788293	1.16957	0.0424742
IPI00855239.1	RT1-EC2 MHC class I RT1.Au heavy chain	2	3	1	2	7.397	9.589	3.836	6.94067	1.05682	1.05682	1.15878	1.0908	0.0588661	1.05682	1.01859	1.45881	1.17807	0.243878	1.08001	0.301198	0.207014	1	1.14815	1.15878	1.10231	0.0887624	1.01055	0.43099	0.080524	1	1.09648	0.92045	1.00564	0.0881497	0.123102	0.921928	0.0876551
IPI00869481.1	Cotl1 Coactosin-like protein	2	4	2	2.66667	6.338	21.13	6.338	11.2687	1.58489	5.44503	5.97035	4.33342	2.39475	1.75388	1.87068	1.51356	1.71271	0.182086	0.395232	0.0989372	0.106315	1.21339	2.75423	0.148594	1.37207	1.31005	0.316625	0.0769516	0.954794	1.04713	3.56451	0.383707	1.66512	1.67804	0.0986515	0.384249	1.00776
IPI00869568.2	Vps35 maternal embryonic message 3	2	3	1	2	1.759	3.141	1.131	2.01033	0.954993	1.28233	1.04713	1.09482	0.168799	0.990832	5.64937	1.28233	2.64084	2.60953	2.41213	0.206376	0.988143	0.870964	0.963829	1	0.944931	0.0665617	0.863094	0.130332	0.0704408	0.981748	1.07647	0.895365	0.984526	0.090582	0.19539	0.89926	0.0920058
IPI00869617.6	- Uncharacterized protein (Fragment)	20	16	16	17.3333	24.37	21.18	20.16	21.9033	0.946237	0.685488	0.946237	0.859321	0.150543	0.253513	0.636796	0.862979	0.584429	0.308089	0.680106	0.130964	0.527162	0.903649	1.00925	0.946237	0.953047	0.0531301	1.10907	0.198818	0.0557477	0.879022	0.580764	0.704693	0.721493	0.149837	0.161966	0.839609	0.207676
IPI00869949.2	Chchd3 Uncharacterized protein	4	4	5	4.33333	15.86	14.54	17.62	16.0067	0.801678	0.654636	0.83946	0.765258	0.0976462	0.222843	0.744732	0.887156	0.618244	0.349753	0.807889	0.273561	0.56572	0.870964	0.92045	0.92045	0.903954	0.0285708	1.18124	0.0618258	0.0316064	1.39316	1.21339	1.1272	1.24458	0.135696	0.00490677	1.62636	0.109029
IPI00870055.2	Me3 NADP-dependent malic enzyme, mitochondrial	2	3	3	2.66667	3.306	4.959	4.959	4.408	0.92045	0.972747	0.972747	0.955315	0.030194	0.824138	0.895365	1.04713	0.922211	0.113894	0.965348	0.334672	0.123501	1	0.990832	0.981748	0.99086	0.00912607	1.03721	0.0851561	0.00921025	0.903649	0.862979	0.990832	0.919153	0.0653215	0.225951	0.962147	0.0710671
IPI00870112.1	Dpysl2 Dihydropyrimidinase-related protein 2	3	2	2	2.33333	4.021	4.72	4.021	4.254	0.990832	0.895365	0.794328	0.893508	0.098265	1.33045	0.831764	0.77983	0.980683	0.304022	1.09756	0.33794	0.31001	1.13763	0.954993	0.92045	1.00436	0.116701	1.12406	0.139251	0.116195	0.887156	0.862979	1.52757	1.09257	0.376914	0.229851	1.22278	0.34498
IPI00870163.1	Agl Uncharacterized protein	4	5	9	6	2.611	2.937	6.984	4.17733	0.954993	0.787046	1.03753	0.926522	0.127645	0.946237	0.990832	1.1272	1.02142	0.0942791	1.10243	0.181732	0.0923017	0.772681	0.903649	1	0.89211	0.114098	0.962859	0.372747	0.127897	1.0666	0.724436	1.03753	0.942853	0.189713	0.454157	1.01763	0.201211
IPI00870183.1	Cisd1 CDGSH iron-sulfur domain-containing protein 1	1	2	3	2	12.04	25.93	34.26	24.0767	0.937562	0.870964	0.862979	0.890501	0.0409508	0.570164	0.765597	0.83946	0.725074	0.139146	0.814231	0.0839286	0.191906	0.855067	0.928966	0.937562	0.907198	0.0453514	1.01875	0.33046	0.0499907	0.758578	0.711214	0.887156	0.785649	0.0910417	0.086884	0.882255	0.115881
IPI00870631.2	Pnp Purine nucleoside phosphorylase	3	5	6	4.66667	12.8	19.38	22.15	18.11	0.963829	1.0666	1.04713	1.02585	0.0545877	1.15878	1.39316	1.10662	1.21952	0.152619	1.18879	0.0740691	0.125147	0.990832	0.83946	1.00925	0.946515	0.0931687	0.922663	0.143546	0.0984334	0.981748	0.92045	1.07647	0.992888	0.078602	0.29328	0.967867	0.079165
IPI00876636.1	Nckap1 Nck-associated protein 1	1	1	1	1	0.9752	0.9752	0.9752	0.9752	0.554626	0.613762	0.60256	0.590316	0.0314119	0.469894	0.539511	0.608135	0.53918	0.069121	0.913375	0.166645	0.128197	0.660694	0.724436	0.758578	0.714569	0.0496824	1.21049	0.0144108	0.0695278	1.20226	1.02802	1.09648	1.10892	0.0877877	0.00241929	1.87852	0.0791651
IPI00877383.1	Mylk3 Cardiac myosin light chain kinase	2	1	2	1.66667	2.799	1.654	3.308	2.587	0.816582	0.928966	1.01859	0.92138	0.101218	0.801678	0.937562	1.10662	0.948621	0.152773	1.02957	0.405671	0.161048	0.903649	0.972747	1.09648	0.990958	0.0976957	1.07552	0.219985	0.0985871	0.954993	0.831764	1.03753	0.941428	0.103551	0.411137	1.02176	0.109993
IPI00882501.1	Ncl Nucleolin	1	3	2	2	1.403	5.891	4.208	3.834	1.00925	1.24738	1.77011	1.34225	0.389198	0.954993	1.07647	1.48594	1.17246	0.278185	0.873508	0.287629	0.237266	0.928966	0.972747	1.38038	1.09403	0.248952	0.815075	0.206641	0.227554	1.23595	1.18032	2.0893	1.50185	0.509499	0.345006	1.11891	0.339246
IPI00886470.2	Hsd17b10 Uncharacterized protein	6	7	6	6.33333	23.99	27.31	27.31	26.2033	0.855067	0.299226	0.847227	0.667174	0.318676	0.77983	1.1695	0.903649	0.950993	0.199102	1.42541	0.136602	0.209362	1.07647	1.97697	0.946237	1.33322	0.56129	1.99832	0.0834763	0.421002	1.0666	1.00925	1.00925	1.02837	0.033107	0.093704	1.54138	0.0321937
IPI00895591.1	Pygm glycogen phosphorylase, muscle form	48	39	40	42.3333	46.08	40.86	40.26	42.4	0.963829	0.233346	0.413047	0.536741	0.380626	0.205116	0.613762	0.855067	0.557982	0.328546	1.03957	0.472628	0.588812	1.28233	0.946237	1.47231	1.23363	0.266398	2.29837	0.0336281	0.215947	1.28233	0.343558	0.619441	0.748443	0.482499	0.292252	1.39442	0.644669
IPI00896144.1	Cav1 caveolin-1 alpha isoform	6	5	3	4.66667	34.83	29.78	25.28	29.9633	0.981748	0.731139	0.903649	0.872179	0.128234	0.963829	0.772681	1.05682	0.931109	0.144867	1.06757	0.313045	0.155585	1.02802	0.801678	0.963829	0.931174	0.116649	1.06764	0.293753	0.125271	0.92045	0.855067	0.824138	0.866551	0.0491722	0.474282	0.993548	0.0567447
IPI00896197.1	Ckmt2 Ckmt2 protein	57	42	44	47.6667	53.46	47.26	49.64	50.12	0.666807	0.244343	0.20893	0.37336	0.254749	0.0648634	0.275423	0.501187	0.280491	0.218206	0.751262	0.328574	0.777943	0.660694	0.824138	0.751623	0.745485	0.081895	1.99669	0.0580823	0.109855	0.666807	0.349945	0.544503	0.520418	0.159798	0.226514	1.39388	0.307057
IPI00914178.1	Fahd2a Fumarylacetoacetate hydrolase domain-containing protein 2	1	2	1	1.33333	3.514	7.987	2.556	4.68567	0.937562	0.816582	0.937562	0.897235	0.0698476	0.887156	0.963829	1.07647	0.975817	0.0952221	1.08758	0.159309	0.097582	0.92045	0.912011	1.14815	0.993538	0.133968	1.10733	0.174939	0.134839	1	1.1695	1.38038	1.18329	0.190567	0.0541715	1.31882	0.161048
IPI00914189.1	Eif3c Eukaryotic translation initiation factor 3 subunit C	2	2	1	1.66667	2.086	2.086	0.9879	1.71997	0.92045	0.895365	1.30617	1.04066	0.230279	1.08643	1.03753	1.83654	1.32016	0.447861	1.26858	0.20378	0.339246	0.981748	1.01859	0.135519	0.711953	0.499546	0.684134	0.19065	0.701656	1.08643	0.990832	0.847227	0.974828	0.1204	0.345161	0.936739	0.123509
IPI00915560.1	Ppa1 inorganic pyrophosphatase	1	1	1	1	2.768	2.768	2.768	2.768	0.963829	1.0666	1.04713	1.02585	0.0545877	0.903649	1.03753	1.15878	1.03332	0.127616	1.00728	0.466111	0.123501	0.83946	0.92045	0.972747	0.910886	0.0671563	0.887931	0.0428093	0.0737264	0.847227	0.724436	0.772681	0.781448	0.0618634	0.00356141	0.761756	0.0791651
IPI00923141.1	Ak2 Isoform 2 of Adenylate kinase 2, mitochondrial	4	3	4	3.66667	16.81	16.81	21.55	18.39	0.990832	0.758578	0.704693	0.818034	0.152053	0.912011	0.77983	0.824138	0.83866	0.0672762	1.02521	0.422396	0.0802187	0.946237	0.831764	0.816582	0.864861	0.0708813	1.05724	0.331845	0.0819569	0.887156	0.794328	0.870964	0.850816	0.0495852	0.375592	1.04007	0.0582796
IPI00947940.1	Ndufa3 Uncharacterized protein (Fragment)	2	2	3	2.33333	20.73	20.73	20.73	20.73	0.912011	1.03753	0.895365	0.948301	0.0777196	0.654636	0.809096	1.01859	0.827441	0.18267	0.872551	0.188359	0.220765	0.946237	1.0666	1.05682	1.02322	0.0668456	1.079	0.137858	0.0653289	0.642688	0.666807	1.01859	0.776029	0.210411	0.145207	0.818335	0.271138
IPI00948266.1	Grtp1 Uncharacterized protein	2	1	1	1.33333	7.955	2.841	2.841	4.54567	1.01859	13.5519	0.946237	5.17224	7.25708	0.928966	11.272	1.07647	4.4258	5.92942	0.855684	0.448595	1.33974	0.981748	1.59956	1.04713	1.20948	0.339397	0.23384	0.222066	0.280614	1.1272	0.912011	1.04713	1.02878	0.108761	0.21347	0.198904	0.105718
IPI00948338.1	C4b complement C4 precursor	2	4	2	2.66667	1.267	2.36	1.267	1.63133	0.685488	0.724436	0.887156	0.765693	0.106977	0.717794	0.963829	0.679204	0.786942	0.154399	1.02775	0.427662	0.196201	0.809096	0.737904	0.0990832	0.548694	0.390998	0.716598	0.220302	0.712598	0.685488	0.895365	0.12942	0.570091	0.395797	0.242901	0.744542	0.69427
IPI00948363.1	Psme1 Uncharacterized protein	4	4	4	4	12.85	12.45	12.45	12.5833	0.946237	1.07647	0.92045	0.981051	0.0836312	0.963829	0.83946	0.887156	0.896815	0.0627446	0.914137	0.120295	0.0699638	0.937562	1.44544	0.963829	1.11561	0.285943	1.13716	0.252715	0.256311	0.990832	1.27057	1	1.08714	0.158929	0.19045	1.10813	0.14619
IPI00948479.1	Fhl1 Uncharacterized protein	1	1	1	1	3.406	3.406	3.406	3.406	1.03753	0.928966	0.92045	0.962315	0.0652757	2.39883	1.24738	1.40605	1.68409	0.62405	1.75004	0.0909024	0.370557	1.52757	1.15878	1.22462	1.30365	0.196689	1.35471	0.0414834	0.150875	0.147231	1.07647	1.13763	0.787108	0.554992	0.320117	0.817932	0.705104
IPI00948515.1	Mtch2 Uncharacterized protein	6	6	6	6	21.5	21.5	21.5	21.5	0.619441	0.847227	0.57544	0.680703	0.145883	0.159956	0.946237	0.879022	0.661738	0.435854	0.97214	0.474231	0.65865	0.765597	0.954993	0.544503	0.755031	0.205449	1.10919	0.319531	0.272107	0.816582	0.903649	0.322107	0.68078	0.313655	0.499859	1.00011	0.46073
IPI00948721.1	Acaa2 Uncharacterized protein (Fragment)	28	23	24	25	55.3	54.8	53.54	54.5467	1.05682	0.343558	0.737904	0.71276	0.357294	0.164437	0.539511	0.717794	0.473914	0.28245	0.6649	0.208816	0.595995	0.816582	0.928966	0.879022	0.874857	0.0563077	1.22742	0.257746	0.0643621	0.630957	0.356451	0.794328	0.593912	0.221277	0.32734	0.833257	0.372575
IPI00948855.1	Snx12 Uncharacterized protein	1	1	1	1	8.434	8.434	8.434	8.434	0.870964	0.946237	0.928966	0.915389	0.0394308	1.64437	1.2942	1.44544	1.46134	0.175628	1.59641	0.013963	0.120183	1.03753	1.01859	1.07647	1.04419	0.0295073	1.14071	0.0063062	0.0282585	0.990832	1.33045	1.41906	1.24678	0.226042	0.0611803	1.36202	0.181301
IPI00948869.1	Pygb glycogen phosphorylase, brain form	30	28	27	28.3333	31.79	31.44	30.13	31.12	0.83946	0.401791	0.487529	0.57626	0.231934	0.359749	0.544503	0.660694	0.521648	0.151768	0.905231	0.376335	0.29094	0.912011	0.724436	0.92045	0.852299	0.110813	1.47902	0.0820249	0.130016	0.636796	0.152757	0.380189	0.389914	0.242166	0.195188	0.676629	0.621076
IPI00948886.1	Atp1a2 Uncharacterized protein	9	11	11	10.3333	8.725	13.24	11.47	11.145	49.6592	42.8549	59.1562	50.5567	8.18763	46.9894	41.6869	62.5173	50.3979	10.8254	0.996858	0.492432	0.214798	0.990832	0.990832	0.990832	0.990832	9.72939e-11	0.0195984	0.00448666	9.81941e-11	72.4436	54.9541	74.4732	67.2903	10.7316	0.0515386	1.33099	0.159481
IPI00949032.1	Itih3 Uncharacterized protein	1	3	2	2	1.35	4.274	2.475	2.69967	1.03753	1.07647	1.35519	1.15639	0.173259	1.44544	0.937562	0.549541	0.977514	0.449284	0.845312	0.286238	0.459619	1.19124	1.07647	0.413047	0.893585	0.420096	0.772734	0.199341	0.470124	0.981748	1.24738	0.737904	0.989012	0.254817	0.203347	0.855255	0.257648
IPI00949066.1	Erp44 Uncharacterized protein (Fragment)	1	1	1	1	3.695	3.695	3.695	3.695	1.10662	1.15878	0.794328	1.01991	0.197092	0.954993	0.946237	0.862979	0.921403	0.0507859	0.903416	0.240519	0.055118	0.946237	1	0.816582	0.92094	0.0942893	0.902962	0.246154	0.102384	0.946237	1.33045	1.05682	1.11117	0.197791	0.30079	1.08948	0.178002
IPI00949353.1	Gfm1 Uncharacterized protein	2	1	1	1.33333	2.406	1.203	1.738	1.78233	1.09648	0.194089	1.14815	0.812907	0.536535	1.0666	1.03753	0.92045	1.00819	0.0773639	1.24023	0.297049	0.0767354	1	0.139316	1.04713	0.728815	0.511065	0.896554	0.426886	0.701227	1	0.130617	1.11686	0.74916	0.538851	0.445788	0.921582	0.719274
IPI00949424.1	Psmd1 Uncharacterized protein (Fragment)	1	1	1	1	1.261	1.261	1.261	1.261	0.794328	0.92045	0.937562	0.884113	0.0782255	0.847227	0.855067	0.887156	0.86315	0.0211561	0.976289	0.346485	0.0245103	1.11686	1.04713	0.981748	1.04858	0.0675692	1.18602	0.0261318	0.0644388	1.72187	1.27057	1.23595	1.40946	0.271105	0.0343214	1.59421	0.192346
IPI00949435.2	Pdlim3 Isoform 1 of PDZ and LIM domain protein 3	2	2	0	1.33333	9.116	9.116	0	6.07733	0.928966	0.963829	1.04713	0.979975	0.0607134	1.02802	1.21339	1.40605	1.21582	0.189028	1.24066	0.0769302	0.155474	1.0666	1.20226	1.27057	1.17981	0.103826	1.20392	0.0291873	0.0880022	1.04713	1.1272	0.870964	1.0151	0.131086	0.351849	1.03584	0.129137
IPI00949517.1	Actr3 Actin-related protein 3	1	3	3	2.33333	2.871	8.134	8.134	6.37967	0.990832	1.36773	1.38038	1.24631	0.221345	0.946237	0.366438	0.794328	0.702334	0.300648	0.563529	0.0352787	0.428069	0.77983	0.270396	0.946237	0.665488	0.352131	0.533964	0.0424556	0.529132	0.862979	0.394457	1.27057	0.84267	0.438411	0.125497	0.676129	0.520265
IPI00949530.1	Ywhaq Uncharacterized protein	8	10	8	8.66667	23.61	27.47	24.03	25.0367	1.04713	28.8403	1.5417	10.4764	15.9056	1.43219	25.5859	0.92045	9.31283	14.0952	0.888936	0.464537	1.51352	1.31826	1.13763	0.60256	1.01948	0.372189	0.0973124	0.205673	0.365077	1	37.6704	1.52757	13.3993	21.021	0.428854	1.279	1.56881
IPI00949815.1	Anxa6 Uncharacterized protein	25	22	24	23.6667	35.38	30.43	34.48	33.43	1.1272	1.02802	1.05682	1.07068	0.0510228	1.67494	1.09648	1.0666	1.27934	0.342929	1.19489	0.20134	0.268051	1.18032	1.04713	1.08643	1.10463	0.0684356	1.03171	0.265848	0.0619537	0.691831	1.01859	1.08643	0.932283	0.210981	0.187071	0.870741	0.226306
IPI00949850.1	Eif3a Uncharacterized protein	3	3	2	2.66667	2.158	2.158	1.637	1.98433	0.990832	0.963829	0.990832	0.981831	0.0155902	1.43219	1.18032	0.152757	0.921755	0.677775	0.938813	0.446046	0.735309	1.30617	1.39316	1.92309	1.54081	0.333913	1.56932	0.0504457	0.216713	1.11686	1.61436	4.13048	2.28723	1.61556	0.148294	2.32956	0.706338
IPI00950192.1	Arhgap1 Rho GTPase activating protein 1	3	2	2	2.33333	7.973	6.606	6.606	7.06167	1.10662	1.22462	1.21339	1.18154	0.0651242	1.18032	1.35519	1.51356	1.34969	0.166688	1.14231	0.107983	0.123501	0.990832	1.08643	1.13763	1.07163	0.0745079	0.906974	0.0639919	0.0695277	0.903649	0.772681	0.824138	0.833489	0.0659833	0.00144374	0.705424	0.0791651
IPI00950390.1	Dynlrb1 Uncharacterized protein (Fragment)	1	1	1	1	11.65	11.65	11.65	11.65	0.724436	1.19124	0.794328	0.903335	0.251771	0.946237	1.28233	1.22462	1.15106	0.179715	1.27423	0.122364	0.15613	1.01859	1.44544	1.18032	1.21478	0.215501	1.34478	0.0902989	0.177399	0.809096	1.05682	0.737904	0.867939	0.167402	0.425302	0.960816	0.192873
IPI00950467.1	Rock2 Uncharacterized protein	3	3	2	2.66667	2.422	2.422	1.73	2.19133	1.14815	1.38038	1.18032	1.23629	0.125824	1.08643	1.03753	1.10662	1.07686	0.0355275	0.871044	0.0756945	0.0329918	1.34276	1.78649	1.51356	1.5476	0.223812	1.25182	0.0611193	0.144618	1.35519	1.49969	1.35519	1.40335	0.0834249	0.0692323	1.13514	0.0594467
IPI00950483.1	Dmd Uncharacterized protein (Fragment)	4	1	3	2.66667	1.013	0.2737	0.7389	0.6752	1.01859	0.60256	0.77983	0.800327	0.208772	0.870964	0.704693	0.831764	0.802473	0.086919	1.00268	0.494016	0.108314	1.10662	0.77983	0.794328	0.893594	0.184632	1.11654	0.296841	0.206617	1.1695	1.15878	1.10662	1.14497	0.0336357	0.0500388	1.43062	0.029377
IPI00950733.1	Ogdh Uncharacterized protein	28	26	29	27.6667	26.88	24.76	25.82	25.82	0.744732	0.177011	0.207014	0.376252	0.319465	0.0972747	0.580764	0.691831	0.456623	0.316121	1.21361	0.386114	0.692302	0.816582	0.946237	0.554626	0.772482	0.199496	2.05309	0.0780887	0.258253	0.457088	0.340408	0.394457	0.397318	0.0583926	0.460116	1.05599	0.146967
IPI00950777.1	Gmfb Uncharacterized protein	1	1	1	1	7.692	7.692	7.692	7.692	1.09648	1.21339	1.19124	1.16704	0.0621006	0.0167494	0.0120226	0.0118032	0.0135251	0.00279451	0.0115893	0.000472428	0.206617	0.870964	0.954993	1.00925	0.94507	0.0696767	0.809803	0.00750934	0.0737265	2.22844	1.88799	2.03236	2.04959	0.170875	0.00330485	1.75624	0.0833703
IPI00950816.1	Sypl1 Uncharacterized protein	1	1	1	1	4.28	4.28	4.28	4.28	1.07647	0.824138	0.816582	0.905728	0.14791	1.09648	0.711214	0.794328	0.86734	0.202744	0.957616	0.40265	0.233754	1.61436	0.83946	0.887156	1.11366	0.434275	1.22957	0.250516	0.389953	0.954993	0.972747	1.03753	0.988423	0.0434432	0.219163	1.0913	0.0439521
IPI00950899.1	- Uncharacterized protein	10	5	4	6.33333	35.98	25.4	15.87	25.75	0.928966	1.25892	0.954993	1.04763	0.183451	0.92045	2.10863	1.10662	1.37857	0.639067	1.31589	0.234116	0.463573	0.879022	1.00925	0.847227	0.911834	0.0858518	0.87038	0.16695	0.0941529	0.870964	2.01372	1.0666	1.31709	0.611177	0.265181	1.25722	0.464034
IPI00950965.1	Aprt Adenine phosphoribosyltransferase	1	2	2	1.66667	7.222	12.78	12.78	10.9273	0.452898	0.724436	0.903649	0.693661	0.226946	2.96483	0.801678	0.737904	1.50147	1.26771	2.16456	0.19246	0.844311	2.208	0.870964	0.954993	1.34465	0.748864	1.93849	0.133932	0.556919	3.90841	1.27057	1.28233	2.15377	1.51957	0.118106	3.10493	0.70554
IPI00951503.1	Hspb7 heat shock protein beta-7	2	2	2	2	17.75	17.75	17.75	17.75	1.00925	1.14815	1.1272	1.09487	0.0748817	1.04713	1.21339	1.36773	1.20942	0.160337	1.10462	0.174093	0.132574	1.14815	1.2942	1.36773	1.27003	0.111765	1.15998	0.0484163	0.0880021	0.954993	0.831764	0.887156	0.891304	0.0617191	0.0117465	0.814074	0.0692458
IPI00951599.1	Gstm1 Uncharacterized protein	2	2	3	2.33333	8.642	8.642	11.93	9.738	0.731139	0.801678	0.0928966	0.541905	0.390449	0.549541	0.855067	0.972747	0.792452	0.218441	1.46235	0.200351	0.275652	0.636796	0.0115878	0.083946	0.24411	0.341995	0.450466	0.188753	1.40099	1.00925	0.0115878	0.111686	0.377509	0.549391	0.34831	0.696634	1.45531
IPI00951791.1	Flna Uncharacterized protein	1	11	3	5	0.3789	5.191	1.592	2.3873	1.01859	1.11686	0.972747	1.03607	0.0736302	1.09648	1	1	1.03216	0.0557016	0.996228	0.472663	0.0539661	0.972747	0.990832	0.954993	0.972857	0.0179199	0.938991	0.136415	0.0184199	1.05682	1.20226	1.07647	1.11185	0.0789155	0.145544	1.07314	0.0709768
IPI00951911.1	Hprt1 Uncharacterized protein	4	2	4	3.33333	22.48	13.3	22.94	19.5733	0.963829	1	0.928966	0.964265	0.0355188	0.928966	0.990832	0.928966	0.949588	0.0357181	0.984779	0.320164	0.0376143	0.981748	1.01859	1.03753	1.01262	0.028365	1.05015	0.0713325	0.0280115	0.895365	0.903649	0.954993	0.918002	0.0323013	0.0855381	0.952023	0.0351865
IPI00951917.1	LOC100362339 Uncharacterized protein	4	4	3	3.66667	27.59	27.59	21.38	25.52	0.912011	0.83946	0.92045	0.89064	0.0445237	1.10662	1.01859	1.13763	1.08761	0.0617529	1.22116	0.00680779	0.0567784	1.10662	1.00925	1.1272	1.08103	0.0630019	1.21376	0.00808064	0.0582797	1.03753	1.01859	1.1272	1.06111	0.0580155	0.00889138	1.1914	0.0546746
IPI00951991.1	Aldoa 45 kDa protein	26	24	22	24	41.39	43.06	41.87	42.1067	0.855067	0.313329	0.432514	0.533636	0.284674	0.130617	0.496592	0.461318	0.362842	0.201885	0.679943	0.22461	0.556398	0.758578	0.912011	0.787046	0.819211	0.0816174	1.53515	0.109541	0.0996293	0.772681	0.413047	0.496592	0.560773	0.188211	0.449035	1.05085	0.335628
IPI00952280.1	Sdha Uncharacterized protein	30	27	24	27	38.55	35.84	32.08	35.49	0.619441	0.18197	0.380189	0.393867	0.219056	0.159956	0.608135	0.630957	0.466349	0.26559	1.18403	0.367229	0.569508	0.758578	0.704693	0.824138	0.76247	0.0598176	1.93586	0.0456476	0.0784524	0.787046	0.316228	0.570164	0.557813	0.235652	0.21378	1.41625	0.422457
IPI00957208.1	LOC100365213 keratin 6A-like	3	3	2	2.66667	6.703	7.065	4.891	6.21967	0.731139	0.691831	0.691831	0.704934	0.0226946	0.666807	0.737904	0.751623	0.718778	0.0455281	1.01964	0.335092	0.0633409	0.717794	0.717794	0.724436	0.720008	0.00383458	1.02138	0.184419	0.00532574	1.00925	0.928966	0.946237	0.961486	0.0422596	0.0012199	1.36394	0.0439524
IPI00957286.1	Sorbs1 sorbin and SH3 domain containing 1	4	2	2	2.66667	4.244	2.238	2.238	2.90667	1.23595	1.38038	1.22462	1.28032	0.0868467	0.981748	1.27057	1.25892	1.17042	0.163495	0.914162	0.189239	0.13969	1.1695	1.35519	1.24738	1.25736	0.0932459	0.982068	0.385326	0.0741602	0.946237	0.912011	1.24738	1.03521	0.184542	0.0668859	0.808559	0.178265
IPI00957427.1	LOC100364813 solute carrier family 25 (mitochondrial carrier; adenine nucleotide translocator), member 31-like	13	13	12	12.6667	13.72	13.72	13.72	13.72	1.11686	1.23595	1.22462	1.19248	0.0657268	1.1272	1.2942	1.44544	1.28894	0.159186	1.0809	0.205806	0.123501	0.92045	1.01859	1.0666	1.00188	0.0744927	0.840167	0.0149904	0.074353	1.13763	0.972747	1.03753	1.0493	0.083068	0.0413697	0.879935	0.0791651
IPI00957440.1	RGD1561416 hydroxypyruvate isomerase homolog	1	1	1	1	4.332	4.332	4.332	4.332	0.0124738	0.0131826	0.011272	0.0123095	0.000965843	0.809096	0.928966	1.03753	0.925197	0.114263	75.1614	0.00258954	0.123501	0.937562	1.02802	1.07647	1.01401	0.0705021	82.3768	0.000822145	0.0695277	1.08643	0.928966	0.990832	1.00207	0.0793296	0.00106587	81.4069	0.0791653
IPI00957717.1	Plod2 procollagen-lysine,2-oxoglutarate 5-dioxygenase 2 isoform 1	1	2	2	1.66667	2.111	3.958	3.958	3.34233	1.08643	1.43219	1.48594	1.33485	0.216813	1.13763	1.33045	1.05682	1.17497	0.140587	0.880223	0.176712	0.119652	0.972747	1.14815	1.20226	1.10772	0.119982	0.829847	0.103559	0.108314	0.963829	1.08643	0.963829	1.00469	0.0707814	0.0536255	0.752665	0.0704507
IPI00957799.1	Slc25a12 solute carrier family 25 (mitochondrial carrier, Aralar), member 12	9	9	6	8	16.67	16.96	10.71	14.78	0.483059	0.448745	0.879022	0.603609	0.239131	0.394457	0.717794	0.879022	0.663758	0.246761	1.09965	0.388438	0.371763	0.928966	0.946237	0.928966	0.934723	0.00997123	1.54856	0.0691838	0.0106676	0.862979	0.83946	0.954993	0.88581	0.0610566	0.0856684	1.46752	0.0689274
IPI00957999.1	LOC363331 plasma membrane associated protein, S3-12-like	2	3	1	2	12.31	22.73	11.1	15.38	0.963829	0.711214	0.903649	0.859564	0.131952	0.801678	0.751623	0.912011	0.821771	0.08206	0.956032	0.349589	0.0998576	0.954993	0.831764	1.04713	0.944628	0.108056	1.09896	0.219071	0.11439	0.937562	0.744732	0.895365	0.85922	0.101369	0.498661	0.999599	0.117978
IPI00958096.1	LOC100360950 GF20391-like isoform 1	28	29	24	27	59.01	59.01	54.5	57.5067	1.1695	1.85353	2.42103	1.81469	0.626669	1.57036	1.27057	0.679204	1.17338	0.45346	0.646602	0.115485	0.386456	0.963829	0.744732	0.794328	0.834296	0.114887	0.459747	0.0544995	0.137705	1.5417	1.7378	2.96483	2.08144	0.771293	0.333562	1.147	0.370557
IPI00958157.1	Gpr98 G protein-coupled receptor 98	1	0	0	0.333333	0.159	0	0	0.053	0.847227	0.937562	0.92045	0.901746	0.0479838	0.903649	1.03753	1.1695	1.03689	0.132926	1.14987	0.106761	0.128197	0.972747	1.0666	1.1272	1.05551	0.0778195	1.17052	0.0272366	0.0737266	0.744732	0.636796	0.679204	0.68691	0.0543794	0.00356142	0.761756	0.0791652
IPI00958283.1	LOC100366237 prefoldin subunit 4-like	1	1	1	1	8.955	8.955	8.955	8.955	0.765597	0.847227	0.83946	0.817428	0.045055	0.60256	0.691831	0.77983	0.691407	0.088636	0.845832	0.0583109	0.128197	0.711214	0.787046	0.824138	0.774132	0.0575591	0.947034	0.183006	0.0743531	1.15878	0.990832	1.05682	1.06881	0.0846122	0.00964305	1.30753	0.0791649
IPI00958860.1	Myom1 myomesin 1	12	8	7	9	9.097	7.061	6.17	7.44267	1.39316	0.895365	0.92045	1.06966	0.28044	0.937562	0.92045	0.946237	0.93475	0.0131218	0.873878	0.246231	0.0140377	1.55597	0.963829	1.01859	1.17946	0.32721	1.10265	0.341144	0.277423	1.35519	0.972747	0.990832	1.10626	0.215772	0.433535	1.03422	0.195047
IPI00958919.1	LOC100365121;Mut;LOC100361295 Uncharacterized protein	3	3	3	3	6.283	5.08	6.283	5.882	1.11686	0.937562	0.185353	0.746593	0.494246	0.972747	1.03753	1.18032	1.06353	0.106202	1.42451	0.191357	0.0998579	1.04713	0.937562	0.108643	0.697778	0.513139	0.934616	0.455631	0.73539	0.824138	0.954993	0.113763	0.630964	0.452663	0.390033	0.845125	0.717415
IPI00959265.1	LOC100363379;LOC100365936 peroxiredoxin-1-like	6	6	6	6	25.13	25.13	22.61	24.29	1.02802	1.00925	0.855067	0.964112	0.0949007	0.990832	1	0.711214	0.900682	0.164148	0.934209	0.300279	0.182249	1	1.01859	0.77983	0.932807	0.132808	0.96753	0.379042	0.142374	1.01859	1.05682	1.00925	1.02822	0.0252023	0.181472	1.0665	0.0245106
IPI00959327.1	Ttn titin	17	14	10	13.6667	0.5275	0.4825	0.3627	0.457567	0.981748	1.85353	1.02802	1.28777	0.490514	1.1272	1.7378	1.18032	1.34844	0.338241	1.04712	0.434794	0.250839	1.09648	1.94089	1.0666	1.36799	0.49637	1.0623	0.425945	0.362847	1.00925	0.937562	1.04713	0.997981	0.0556464	0.206981	0.774971	0.055759
IPI00959453.1	Eif4g1 eukaryotic translation initiation factor 4, gamma 1 isoform 2	3	4	2	3	1.939	2.564	1.376	1.95967	1.20226	1.0666	7.94328	3.40405	3.93168	1.19124	1.11686	6.66807	2.99206	3.18373	0.878971	0.447464	1.06406	1.21339	1.03753	0.990832	1.08058	0.117359	0.317441	0.206845	0.108607	1.25892	1.25892	1.13763	1.21849	0.0700314	0.218617	0.357954	0.0574738
IPI00959660.1	LOC100363782 RAB1B, member RAS oncogene family-like	3	3	3	3	13.39	13.39	13.39	13.39	0.990832	0.963829	1.04713	1.0006	0.0424998	1.03753	1.1272	1.25892	1.14122	0.111362	1.14054	0.0743501	0.097582	1.04713	1.05682	1.14815	1.08403	0.0557408	1.08339	0.0565616	0.0514198	1.02802	1.07647	1.13763	1.0807	0.0549283	0.0604221	1.08006	0.0508264
IPI00971325.1	Ldb3 RCG42332	16	10	12	12.6667	39.58	39.58	33.92	37.6933	1.09648	0.698232	0.77983	0.85818	0.210366	0.879022	0.787046	0.903649	0.856573	0.0614581	0.998127	0.495433	0.0717489	1.08643	0.744732	0.765597	0.865585	0.191538	1.00863	0.483111	0.221282	0.809096	0.679204	0.457088	0.648463	0.178006	0.129829	0.755625	0.274505
IPI00991200.1	Ryr2 Islet-type ryanodine receptor	9	7	8	8	2.082	1.759	2.143	1.99467	1.00925	0.912011	0.928966	0.950077	0.0519447	0.990832	0.954993	0.963829	0.969885	0.0186713	1.02085	0.293042	0.0192511	1.02802	0.972747	0.928966	0.976577	0.0496357	1.02789	0.278869	0.0508262	0.972747	0.972747	1.00925	0.984916	0.0210766	0.185057	1.03667	0.0213994
IPI00991281.1	Apoo apolipoprotein O	3	2	2	2.33333	10.61	10.61	10.61	10.61	0.928966	0.765597	0.580764	0.758442	0.174211	0.630957	0.731139	0.711214	0.691103	0.0530321	0.911214	0.289176	0.0767355	1.04713	1.09648	1.18032	1.10798	0.0673363	1.46086	0.0294643	0.0607741	0.981748	0.711214	0.597035	0.763332	0.197581	0.487957	1.00645	0.25884
IPI00991286.1	Psap sulfated glycoprotein 1 isoform D preproprotein	1	2	1	1.33333	1.627	3.436	1.627	2.23	1.10662	1.08643	1.21339	1.13548	0.0682231	1.8197	1.24738	2.33346	1.80018	0.543301	1.58539	0.0831632	0.301803	0.831764	1.08643	0.963829	0.960673	0.12736	0.84605	0.0626525	0.132574	0.77983	1.15878	0.717794	0.885467	0.238717	0.102708	0.779818	0.269594
IPI00991304.1	Myof myoferlin	3	3	1	2.33333	1.659	1.659	0.4878	1.2686	0.831764	1.58489	2.31206	1.57624	0.740189	0.0731139	0.17378	0.737904	0.328266	0.35831	0.208259	0.0407902	1.09152	0.10666	0.328095	0.229087	0.221281	0.110924	0.140385	0.0418037	0.501282	1.34276	1.51356	1.92309	1.59314	0.298235	0.486671	1.01072	0.1872
IPI01016287.1	Marcks Uncharacterized protein	5	2	2	3	27.51	10.68	11.97	16.72	2.75423	24.4343	4.2462	10.4782	12.1093	9.90832	19.9526	1.35519	10.4054	9.30867	0.993046	0.496914	0.894602	1.7378	14.5881	0.972747	5.76623	7.64957	0.550305	0.302268	1.32662	2.99226	22.2843	1.92309	9.06657	11.4594	0.445258	0.865275	1.26392
IPI01016403.1	Gk glycerol kinase	1	1	1	1	2.481	2.481	2.481	2.481	0.0990832	0.879022	0.862979	0.613695	0.445739	0.0539511	0.011695	0.0121339	0.0259266	0.0242708	0.0422468	0.0746977	0.936135	1.01859	0.824138	0.862979	0.901903	0.102904	1.46963	0.189822	0.114097	1.38038	1.52757	1.6293	1.51242	0.125146	0.0318998	2.46444	0.0827456
IPI01016428.1	Ndufb4 Uncharacterized protein	6	4	3	4.33333	37.21	26.36	18.6	27.39	0.285759	0.133045	0.77983	0.399545	0.338072	0.0954993	0.483059	0.928966	0.502508	0.417074	1.2577	0.378557	0.829984	0.744732	0.77983	0.92045	0.815004	0.0929896	2.03983	0.0798199	0.114097	0.847227	0.510505	0.946237	0.76799	0.228417	0.101271	1.92216	0.297423
IPI01016527.1	Cast calpastatin isoform a	1	2	2	1.66667	1.823	4.348	4.348	3.50633	1.43219	1	1.23595	1.22271	0.216398	1.61436	1.05682	1.28233	1.31784	0.280461	1.0778	0.333758	0.212819	1.23595	0.887156	1.03753	1.05354	0.174946	0.861645	0.177087	0.166055	1.1272	1.15878	0.903649	1.06321	0.139081	0.176427	0.869549	0.130813
